# Supplementary material for: The Combination of CA125 and NSE Is Useful for Predicting Liver Metastasis of Lung Cancer
Source: Hindawi journal article supplement (doi:10.1155/2020/8850873), 2020-12-09
Supplement: f1 [file 8850873.f1.pdf]

| Calcium (mmol/L) |     |
|------------------|-----|
| LM               | NLM |

| CEA (ng/mL) |     |
|-------------|-----|
| LM          | NLM |

| CA - 125 (U/mL) |     |
|-----------------|-----|
| LM              | NLM |

| CA - 153 |
|----------|
| LM       |

|      |      |        |       |        |       |       |
|------|------|--------|-------|--------|-------|-------|
| 2.32 | 2.24 | 5.1    | 9.2   | 411.3  | 91    | 181   |
| 2.21 | 2.31 | 4      | 81    | 6      | 66    | 21    |
| 2.23 | 2    | 38.39  | 3     | 942.2  | 8     | 32    |
| 2.81 | 2.31 | 277    | 1.27  | 253    | 13.48 | 8.35  |
| 2.17 | 2.12 | 79.12  | 2     | 222.1  | 9     | 14    |
| 2.01 | 2.2  | 9.94   | 1     | 9      | 97    | 11    |
| 2.18 | 2.36 | 40.65  | 1.08  | 206.2  | 9.6   | 54.22 |
| 2.17 | 2.31 | 8.36   | 4     | 236.8  | 8     | 11    |
| 2.07 | 2.13 | 4      | 4     | 9      | 6     | 9     |
| 2.44 | 2.05 | 12     | 13.78 | 13.22  | 22    | 7.67  |
| 2.27 | 2.28 | 20.08  | 55    | 272.85 | 8     | 23    |
| 2.39 | 2.33 | 81.87  | 17.04 | 87.38  | 49.58 | 11    |
| 2.17 | 2.26 | 63.62  | 24.99 | 11.87  | 451.4 | 8.5   |
| 2.43 | 2.2  | 2.67   | 53    | 2.81   | 21    | 20.91 |
| 2    | 2.25 | 172    | 1.9   | 9      | 905.4 | 2     |
| 2.02 | 2.32 | 218    | 228.4 | 9      | 58.46 | 11    |
| 2.11 | 2.3  | 0.36   | 1     | 107.7  | 21    | 4.63  |
| 2.32 | 2.42 | 574    | 12    | 12     | 9     | 21    |
| 2.48 | 1.96 | 16.33  | 9.1   | 9      | 56.29 | 9     |
| 2.26 | 2.1  | 1.89   | 1     | 22     | 21    | 21    |
| 2.1  | 2.2  | 54     | 1     | 224    | 54    | 15.6  |
| 2.18 | 2.12 | 209.4  | 7     | 2227   | 60    | 450.2 |
| 2.23 | 2.02 | 32     | 66.37 | 89     | 57    | 3     |
| 2.21 | 1.96 | 217.2  | 8.35  | 26.06  | 91    | 9     |
| 2.16 | 1.83 | 481.9  | 2.91  | 770.2  | 21.2  | 14    |
| 2.1  | 2.3  | 859    | 23    | 32     | 14    | 24.2  |
| 2.28 | 2    | 5.74   | 609   | 10.23  | 14    | 7.93  |
| 2.2  | 2.27 | 10.39  | 23    | 58.31  | 22    | 9     |
| 2.43 | 2.37 | 4      | 1.21  | 21     | 15.17 | 9     |
| 2.16 | 2.17 | 0.93   | 1.17  | 18.79  | 8.26  | 8     |
| 2.2  | 2.55 | 105    | 23    | 1200   | 6     | 13    |
| 2.16 | 2.12 | 12.59  | 3.82  | 144.92 | 30.15 | 23    |
| 2.41 | 2.08 | 13.69  | 2.02  | 1129   | 15.15 | 2     |
| 1.89 | 2.32 | 79     | 68.11 | 1200   | 48.09 | 500   |
| 2    | 2.15 | 64.29  | 21    | 124.4  | 9     | 9     |
| 2.5  | 2.19 | 32     | 46.71 | 8      | 31    | 9     |
| 2.1  | 2.4  | 1      | 15    | 97     | 33    | 9     |
| 2.07 | 2.4  | 1      | 12    | 174    | 7     | 8     |
| 1.98 | 2.4  | 2.89   | 24    | 22     | 9     | 4     |
| 2.08 | 2.17 | 1.74   | 34    | 10.25  | 22    | 13.74 |
| 2.59 | 2.42 | 18.72  | 1     | 121.4  | 66    | 38    |
| 2.14 | 2.32 | 10.37  | 6.21  | 26.87  | 44.91 | 9     |
| 2.01 | 2.23 | 55     | 284.6 | 76     | 29.59 | 11    |
| 1.68 | 2.33 | 172.46 | 38.63 | 197.31 | 26.55 | 74    |
| 2.11 | 2.28 | 1050   | 1     | 7      | 120   | 3     |
| 2.26 | 2.21 | 20.41  | 16.01 | 22.93  | 14.45 | 12    |
| 2.2  | 2.47 | 6      | 44.31 | 28     | 29.5  | 9     |
| 2    | 2.27 | 105    | 0.47  | 82     | 6.67  | 13    |
| 2.1  | 2.14 | 32     | 1.69  | 13     | 12    | 11    |

|      |      |       |       |        |       |       |
|------|------|-------|-------|--------|-------|-------|
| 2.28 | 2.19 | 123.5 | 1.43  | 1854   | 34.42 | 8     |
| 2.01 | 2.32 | 1     | 11.36 | 9      | 23    | 158   |
| 2.02 | 1.28 | 216.8 | 43    | 1221   | 9     | 40.71 |
| 2.32 | 2.48 | 209   | 1     | 6      | 91.97 | 32    |
| 2.16 | 2.24 | 54    | 44.04 | 71     | 15.88 | 21    |
| 2.01 | 2.15 | 720   | 1.56  | 1200   | 25.62 | 21    |
| 2.34 | 2.22 | 29    | 3.95  | 122    | 33.73 | 47    |
| 2.1  | 2.35 | 2     | 1.51  | 41     | 15    | 7.54  |
| 2.42 | 2.26 | 32.42 | 1.44  | 21     | 42.53 | 9     |
| 2.41 | 2.18 | 12    | 28    | 9      | 166   | 2     |
| 2    | 2.5  | 511   | 1     | 9      | 18    | 32    |
| 2.02 | 2.3  | 2.32  | 44    | 5.34   | 143   | 4.69  |
| 2.22 | 2.34 | 1.68  | 4     | 530.1  | 18    | 21    |
| 2.4  | 1.92 | 27.63 | 32    | 12     | 6     | 32    |
| 2.08 | 2.08 | 245.5 | 23    | 72.15  | 77    | 9     |
| 2.24 | 2.43 | 46.45 | 51.57 | 168.9  | 62.18 | 21    |
| 2.3  | 2.66 | 28.63 | 23.56 | 9      | 19.27 | 9.28  |
| 2.35 | 2.09 | 1.88  | 31.96 | 121.6  | 172   | 4     |
| 2.02 | 2.3  | 77.66 | 405   | 31.6   | 271   | 9     |
| 2.52 | 2.24 | 2.23  | 1.19  | 225.3  | 528.4 | 9     |
| 2.43 | 2.58 | 1571  | 45    | 7      | 7     | 9     |
| 1.35 | 2.47 | 4.27  | 4     | 10.59  | 91    | 9     |
| 2.38 | 2.49 | 16.59 | 252.5 | 56.8   | 6     | 56.8  |
| 3.5  | 2.32 | 1     | 3.61  | 22     | 1193  | 121.8 |
| 2.26 | 2.3  | 3     | 1     | 54     | 57    | 21    |
| 1.9  | 2.02 | 3     | 6.72  | 91     | 13.32 | 11    |
| 2.5  | 2.13 | 0.56  | 2.13  | 272.8  | 36.6  | 121   |
| 2.09 | 1.98 | 7.43  | 7.47  | 21     | 23.43 | 13    |
| 2.43 | 2.07 | 428.3 | 25.37 | 488.4  | 52.49 | 201.9 |
| 2.43 | 2.45 | 568.2 | 2.66  | 467    | 59.73 | 231   |
| 2.43 | 2.34 | 49.15 | 67.59 | 111.2  | 22    | 8     |
| 2.26 | 2.14 | 3.69  | 2.58  | 45.53  | 102   | 17.46 |
| 2.15 | 2.2  | 40.19 | 5.2   | 11.94  | 9     | 21    |
| 2.43 | 2.4  | 181   | 12.3  | 38     | 44    | 14    |
| 2.14 | 2.1  | 3.67  | 45    | 125.4  | 64    | 8     |
| 2.5  | 2.2  | 43    | 41    | 21     | 32    | 2     |
| 2.3  | 2.7  | 40.9  | 1050  | 30.73  | 221   | 9     |
| 2.26 | 2.31 | 21.68 | 11    | 29.49  | 8     | 22    |
| 1.93 | 2.32 | 66    | 160.2 | 21     | 7     | 9     |
| 2.08 | 2.2  | 4     | 42    | 257    | 21    | 59.65 |
| 2.25 | 2.16 | 24.56 | 0.05  | 14     | 22.45 | 21    |
| 2.1  | 2.04 | 51    | 1050  | 76     | 317.2 | 2     |
| 2.41 | 2.1  | 32    | 1.42  | 22     | 9     | 11    |
| 2.18 | 2.17 | 1221  | 106.4 | 372.4  | 218.3 | 12    |
| 2.22 | 2.42 | 1.11  | 3     | 24.72  | 7     | 21    |
| 2.15 | 2.34 | 0.81  | 8.85  | 1.62   | 11.51 | 25.9  |
| 2.58 | 2.13 | 32    | 425.8 | 9      | 1213  | 8     |
| 2.05 | 2.51 | 465.7 | 1.86  | 60.85  | 99.5  | 9     |
| 2.75 | 2.11 | 17.24 | 48.41 | 660.35 | 3.05  | 500   |
| 2.42 | 2.12 | 1.16  | 2.97  | 128.3  | 19.95 | 8     |
| 2.19 | 2.24 | 54.76 | 5.83  | 43     | 32    | 21    |

|      |      |       |       |       |        |       |
|------|------|-------|-------|-------|--------|-------|
| 2.06 | 2.16 | 253.9 | 113.9 | 59.62 | 5      | 50.84 |
| 2.32 | 1.8  | 822.3 | 0.41  | 39.33 | 37.07  | 16.02 |
| 2.13 | 2.15 | 4.32  | 4.56  | 12    | 22     | 4.32  |
| 2.02 | 2.4  | 21    | 3     | 9     | 54     | 4     |
| 2.3  | 2.3  | 2.07  | 3     | 170.9 | 693    | 9     |
| 2.3  | 2.19 | 1050  | 41    | 143   | 9      | 12.66 |
| 2.3  | 2.15 | 38.26 | 0.54  | 69.78 | 35.92  | 19    |
| 2.06 | 2.53 | 695.8 | 2.3   | 28.31 | 54     | 8     |
| 2.18 | 2.38 | 2.22  | 105   | 96.44 | 327.58 | 13    |
| 2.5  | 1.96 | 2.15  | 14.91 | 41.05 | 67.94  | 32    |
| 2.19 | 2.56 | 34    | 11.46 | 9     | 52.63  | 17.89 |
| 2.87 | 2.3  | 1     | 89    | 9     | 182    | 1.17  |
| 2.56 | 2.22 | 1.67  | 3.57  | 16.68 | 27.7   | 5     |
| 2.48 | 2.2  | 0.7   | 0.49  | 3     | 12     | 21    |
| 2.35 | 2.1  | 105   | 2     | 3     | 168    | 21    |
| 2.17 | 2.47 | 5.57  | 55.27 | 15.95 | 124.8  | 62.45 |
| 2.37 | 2.47 | 62.64 | 12    | 4     | 73     | 7     |
| 2.15 | 1.91 | 2.48  | 21    | 4.38  | 24     | 12    |
| 2.14 | 2.06 | 24.68 | 14    | 10.03 | 42     | 21    |
| 2.38 | 2.25 | 0.57  | 2     | 8.02  | 7      | 21    |
| 2.17 | 2.07 | 1.01  | 2     | 1200  | 30     | 45.37 |
| 2.17 | 2.8  | 6.65  | 3.87  | 7     | 9      | 1.93  |
| 2    | 2.8  | 32    | 2.37  | 33    | 907.5  | 11    |
| 2.09 | 2.36 | 131.5 | 45.13 | 149   | 192.8  | 12    |
| 2.23 | 2.01 | 105   | 3.79  | 9     | 9      | 21    |
| 2.3  | 2.07 | 2.4   | 2.66  | 73.05 | 47.47  | 11    |
| 2.46 | 2.58 | 0.02  | 4.44  | 62    | 14.22  | 0.17  |
| 3.1  | 2.11 | 1     | 3.12  | 23    | 46     | 28.71 |
| 2.16 | 2.29 | 4.77  | 21    | 16.22 | 37     | 11.66 |
| 2.12 | 2.19 | 3.79  | 2.49  | 53.25 | 5.26   | 12.72 |
| 2.51 | 2.37 | 31    | 23    | 34    | 7      | 3     |
| 2.46 | 2.13 | 28.45 | 32    | 15.27 | 43     | 14    |
| 2.32 | 2.13 | 7.68  | 1     | 30.38 | 9      | 8.04  |
| 2.19 | 2.86 | 4     | 16    | 74    | 54     | 8.54  |
| 2.28 | 2.3  | 164.8 | 47.53 | 612   | 29.2   | 36    |
| 2.2  | 2.33 | 31    | 12    | 54    | 9.27   | 12    |
| 2.67 | 2.55 | 80.94 | 37.13 | 28    | 7.36   | 11    |
| 2.51 | 2.31 | 12    | 54    | 32    | 91     | 21    |
| 2.1  | 2.48 | 5     | 91    | 108   | 61     | 32    |
| 2.2  | 2.49 | 4.57  | 0.92  | 77.6  | 92     | 96.78 |
| 2.29 | 2    | 1.83  | 5.1   | 7.5   | 302.2  | 12.3  |
| 2.16 | 2.04 | 21    | 0.65  | 24    | 17     | 11    |
| 2.33 | 2.14 | 2.46  | 105   | 15.14 | 76     | 12    |
| 2.3  | 2.2  | 13    | 4     | 66    | 41     | 13.23 |
| 2.3  | 2.3  | 45    | 5     | 189   | 21     | 156   |
| 2.26 | 2.2  | 21    | 1     | 9     | 231    | 11    |
| 2.16 | 2.14 | 299   | 43    | 156   | 43     | 13    |
| 2.1  | 2.26 | 1     | 9     | 244   | 6      | 28    |
| 2.17 | 2.23 | 4.9   | 4     | 188.4 | 33     | 91    |
| 2.19 | 2.32 | 4.67  | 149.8 | 21    | 1104   | 11    |
| 2.34 | 2.15 | 30.99 | 1.83  | 5     | 9.45   | 22.7  |

|      |      |       |       |       |       |       |
|------|------|-------|-------|-------|-------|-------|
| 2.23 | 2.1  | 105   | 1     | 16    | 71    | 2     |
| 2.11 | 2.25 | 432   | 4     | 53.16 | 51    | 25.99 |
| 2.3  | 2.21 | 4.52  | 14.58 | 13.18 | 18.37 | 9     |
| 2.1  | 2.38 | 10.5  | 18.88 | 53    | 14.58 | 3.2   |
| 1.87 | 1.96 | 1.51  | 2.85  | 6.84  | 16.11 | 8     |
| 2.28 | 2.15 | 12    | 2.26  | 8     | 63.85 | 12    |
| 2.23 | 2.23 | 71.15 | 1.43  | 2289  | 204.2 | 9.8   |
| 2.02 | 2.25 | 6.1   | 5.38  | 71.01 | 4     | 13.29 |
| 2.14 | 2.15 | 15    | 12.3  | 44    | 51    | 31    |
| 2.08 | 2.3  | 50    | 1     | 19    | 170   | 16    |
| 1.91 | 2.3  | 105   | 53    | 21    | 8     | 11    |
| 2.24 | 2.7  | 46    | 2     | 9     | 9     | 7     |
| 1.89 | 2.1  | 42    | 5     | 321   | 43    | 9     |
| 1.87 | 2.28 | 6.47  | 1050  | 37.92 | 224   | 12.1  |
| 2.1  | 1.75 | 52    | 3.24  | 54    | 247.9 | 46.09 |
| 2.5  | 2.13 | 12    | 3     | 32    | 58    | 13    |
| 2.26 | 2.29 | 38.13 | 21    | 123.6 | 64    | 182.9 |
| 2.3  | 1.98 | 5     | 2     | 32    | 887   | 12    |
| 2.22 | 2.13 | 25    | 19    | 9     | 425   | 43    |
| 2.01 | 2.47 | 12    | 37    | 76    | 44    | 11.87 |
| 1.92 | 2.6  | 23    | 7.97  | 261   | 59.89 | 9     |
|      | 2.59 |       | 3.01  |       | 198.7 |       |
|      | 2.37 |       | 2.25  |       | 86    |       |
|      | 2.25 |       | 55.08 |       | 402.1 |       |
|      | 2.29 |       | 1.85  |       | 151.7 |       |
|      | 2.55 |       | 0.99  |       | 75.77 |       |
|      | 2.38 |       | 1.6   |       | 30.86 |       |
|      | 2.49 |       | 4.39  |       | 20.95 |       |
|      | 2.42 |       | 73.71 |       | 6     |       |
|      | 2.47 |       | 50    |       | 4     |       |
|      | 2.27 |       | 4     |       | 8     |       |
|      | 2.39 |       | 2     |       | 25    |       |
|      | 2.32 |       | 1     |       | 6     |       |
|      | 2.36 |       | 29.79 |       | 86.86 |       |
|      | 1.92 |       | 34    |       | 6     |       |
|      | 2.48 |       | 61.18 |       | 47.21 |       |
|      | 2.42 |       | 1.97  |       | 11.63 |       |
|      | 2.01 |       | 2.64  |       | 103.2 |       |
|      | 2    |       | 23.21 |       | 66    |       |
|      | 2.18 |       | 1.7   |       | 84.73 |       |
|      | 2.3  |       | 4     |       | 11    |       |
|      | 1.98 |       | 5.2   |       | 13    |       |
|      | 2.1  |       | 21    |       | 14    |       |
|      | 2.3  |       | 12    |       | 21    |       |
|      | 2.2  |       | 33    |       | 6     |       |
|      | 2.2  |       | 42    |       | 33    |       |
|      | 1.73 |       | 63    |       | 330   |       |
|      | 2.23 |       | 5     |       | 10    |       |
|      | 2.15 |       | 4.65  |       | 82.87 |       |
|      | 2.21 |       | 4.76  |       | 61.81 |       |
|      | 2.14 |       | 1     |       | 43    |       |

|       |         |         |
|-------|---------|---------|
| 2. 69 | 13. 22  | 17. 37  |
| 2. 67 | 10. 91  | 16. 86  |
| 2. 41 | 151. 7  | 7       |
| 2. 57 | 7. 44   | 29. 28  |
| 2. 51 | 580     | 191. 8  |
| 2. 47 | 0. 97   | 10. 79  |
| 2. 4  | 6. 5    | 29. 33  |
| 2. 58 | 1. 7    | 6. 59   |
| 2. 09 | 3       | 9       |
| 2. 26 | 26. 73  | 59. 49  |
| 2. 44 | 1. 23   | 8       |
| 2     | 4       | 8       |
| 2     | 23      | 6       |
| 2. 43 | 3       | 62      |
| 2. 39 | 3. 78   | 675. 56 |
| 3. 03 | 4. 02   | 26. 09  |
| 2. 14 | 726. 12 | 18. 8   |
| 2. 14 | 4. 59   | 148. 7  |
| 2. 59 | 1. 12   | 42. 66  |
| 2. 09 | 70. 46  | 49. 3   |
| 2. 2  | 62      | 542. 2  |
| 1. 88 | 2. 04   | 68. 78  |
| 2. 27 | 43. 21  | 32      |
| 2. 12 | 745     | 8. 63   |
| 2. 25 | 4. 29   | 39. 14  |
| 2. 23 | 9. 77   | 49. 84  |
| 2. 4  | 2       | 6       |
| 2. 55 | 53      | 21      |
| 2. 25 | 65      | 32      |
| 2. 13 | 19      | 240     |
| 1. 94 | 32      | 13      |
| 2. 23 | 8. 17   | 29. 62  |
| 2. 14 | 1       | 135     |
| 2. 37 | 31      | 7       |
| 2. 32 | 1. 64   | 7. 55   |
| 2. 35 | 97. 26  | 24. 86  |
| 2. 32 | 1. 01   | 20. 16  |
| 2. 34 | 12      | 32      |
| 2. 26 | 4. 45   | 6. 16   |
| 2. 19 | 14      | 6       |
| 2. 06 | 51      | 7       |
| 2. 31 | 1       | 21      |
| 2. 28 | 12      | 6       |
| 2. 35 | 70. 36  | 10. 54  |
| 2. 46 | 22      | 96      |
| 2. 23 | 4       | 37      |
| 2. 7  | 1       | 96      |
| 2. 26 | 2. 1    | 32      |
| 2. 43 | 2. 01   | 24      |
| 2. 08 | 2. 3    | 87      |
| 2     | 3. 34   | 41      |

|       |        |         |
|-------|--------|---------|
| 2. 13 | 1. 04  | 22      |
| 2. 28 | 39. 02 | 257. 1  |
| 2. 1  | 3      | 1200    |
| 2. 3  | 1      | 85      |
| 2. 2  | 12     | 29      |
| 2. 3  | 42     | 9       |
| 2. 2  | 1      | 4       |
| 2. 85 | 4      | 8       |
| 2. 77 | 4      | 33      |
| 2. 61 | 4      | 13      |
| 2. 26 | 17     | 7       |
| 2. 13 | 6      | 6       |
| 2. 25 | 2      | 5       |
| 2. 31 | 4      | 65      |
| 2. 43 | 10. 1  | 52. 97  |
| 2. 47 | 6. 72  | 78. 99  |
| 2. 62 | 5847   | 12      |
| 2. 45 | 4. 24  | 96. 5   |
| 2. 12 | 56. 93 | 396. 61 |
| 2. 19 | 1. 1   | 3       |
| 1. 97 | 4. 9   | 31      |
| 2. 55 | 4      | 76      |
| 2. 31 | 12     | 32      |
| 2     | 3. 3   | 112     |
| 2. 6  | 12     | 22      |
| 2. 46 | 2. 55  | 16. 01  |
| 2. 2  | 2. 51  | 17. 23  |
| 2. 34 | 5. 39  | 12. 43  |
| 5. 13 | 64. 89 | 24. 32  |
| 2. 38 | 7. 76  | 8. 59   |
| 2. 31 | 1. 63  | 4       |
| 1. 96 | 1. 91  | 22      |
| 2. 41 | 4. 22  | 8. 12   |
| 2. 44 | 96. 1  | 22. 53  |
| 2. 5  | 32     | 8       |
| 2. 4  | 138    | 118     |
| 2. 2  | 4      | 23      |
| 2. 3  | 2      | 49      |
| 2. 3  | 32     | 21      |
| 2. 56 | 2. 18  | 4. 42   |
| 2. 3  | 23     | 65      |
| 2. 3  | 3      | 7       |
| 1. 63 | 1      | 127     |
| 2. 28 | 17     | 3       |
| 2. 13 | 32     | 7       |
| 2. 15 | 32     | 21      |
| 2. 2  | 2      | 488     |
| 2. 46 | 5. 11  | 8       |
| 2. 27 | 9      | 121     |
| 2. 2  | 5      | 14      |
| 2. 31 | 477. 3 | 15. 86  |

|       |        |         |
|-------|--------|---------|
| 2. 29 | 1. 42  | 23. 6   |
| 2. 46 | 1. 79  | 115. 7  |
| 2     | 2. 1   | 7       |
| 2. 41 | 18. 97 | 65. 43  |
| 2. 18 | 4      | 5       |
| 1. 67 | 3. 39  | 45. 12  |
| 2. 78 | 10. 77 | 29. 08  |
| 2. 16 | 71. 4  | 112. 3  |
| 2. 34 | 1. 16  | 9. 37   |
| 1. 96 | 6. 28  | 19. 19  |
| 2. 13 | 1. 84  | 19      |
| 2. 39 | 1. 82  | 11. 54  |
| 2. 24 | 0. 57  | 23. 21  |
| 2. 37 | 2. 12  | 168. 5  |
| 2. 09 | 157. 6 | 52      |
| 2. 4  | 4. 35  | 21. 47  |
| 2. 14 | 2. 98  | 21      |
| 2. 34 | 2. 8   | 24. 66  |
| 2. 19 | 6. 29  | 50. 08  |
| 2. 5  | 1      | 18      |
| 2. 3  | 34     | 23      |
| 2     | 32     | 21      |
| 2. 4  | 12     | 21      |
| 2. 6  | 1      | 43      |
| 2. 3  | 1050   | 21      |
| 2. 3  | 12     | 21      |
| 2. 4  | 3      | 43      |
| 2. 18 | 18. 68 | 162. 2  |
| 2. 4  | 21     | 32      |
| 2. 3  | 14     | 9       |
| 2. 2  | 12     | 43      |
| 2. 15 | 23     | 9       |
| 2. 1  | 11     | 8       |
| 2. 13 | 0. 99  | 44. 47  |
| 2. 07 | 2. 45  | 24. 68  |
| 2. 22 | 15. 95 | 12. 76  |
| 2. 51 | 3      | 3       |
| 2. 23 | 11     | 48      |
| 2. 17 | 12. 9  | 11. 76  |
| 2. 41 | 1. 82  | 4       |
| 2. 39 | 37. 28 | 390. 3  |
| 2. 44 | 5. 3   | 86. 66  |
| 2. 19 | 4. 57  | 9       |
| 2. 26 | 10. 21 | 226. 16 |
| 2. 14 | 1. 33  | 21      |
| 2. 33 | 1. 28  | 2. 5    |
| 2. 09 | 1      | 116     |
| 2. 3  | 18     | 59      |
| 2. 07 | 57. 45 | 22      |
| 2. 13 | 1. 85  | 8       |
| 2. 25 | 4. 11  | 15. 15  |

|      |        |        |
|------|--------|--------|
| 1.89 | 2.14   | 44.48  |
| 2.01 | 3.62   | 9.88   |
| 2.26 | 189.4  | 41     |
| 2.24 | 2.45   | 4.69   |
| 2.18 | 1.95   | 45.9   |
| 2.27 | 3.66   | 21.97  |
| 2.33 | 6.72   | 12     |
| 2.31 | 3.92   | 7      |
| 2.15 | 3.02   | 9.24   |
| 2.54 | 2.27   | 57.99  |
| 2.11 | 3      | 31     |
| 2.03 | 7.19   | 19.92  |
| 2.3  | 17     | 6      |
| 2.15 | 4.53   | 67     |
| 2.2  | 1      | 7      |
| 2.2  | 35     | 26     |
| 2.3  | 3      | 32     |
| 2.2  | 6      | 9      |
| 2.7  | 2      | 32     |
| 2.2  | 9      | 6      |
| 2.3  | 98     | 8      |
| 2.1  | 2      | 122    |
| 2.12 | 2      | 9      |
| 2.35 | 11.52  | 37.81  |
| 2.2  | 330.2  | 49.27  |
| 2.21 | 21     | 4      |
| 2.48 | 211.5  | 127    |
| 2.31 | 245.79 | 487.07 |
| 2.06 | 1      | 36     |
| 2.58 | 3.33   | 22     |
| 2.01 | 7.77   | 741.4  |
| 2.27 | 1      | 9      |
| 2.15 | 4      | 7      |
| 2.35 | 13.82  | 13.12  |
| 2.2  | 5      | 15     |
| 2.12 | 1.09   | 18.4   |
| 2.31 | 2.96   | 38.78  |
| 2.37 | 10.73  | 22.11  |
| 1.98 | 23.8   | 62.63  |
| 2.05 | 21.57  | 19     |
| 2    | 1.49   | 16.64  |
| 2.12 | 2.26   | 25     |
| 2.18 | 0.95   | 10.25  |
| 2.09 | 1.41   | 8.7    |
| 2.4  | 4.43   | 13     |
| 2.31 | 54.32  | 7      |
| 2.17 | 16.64  | 73.84  |
| 2.15 | 0.97   | 6.94   |
| 2.21 | 21     | 12     |
| 2.2  | 3.76   | 12     |
| 2.1  | 4      | 37     |



|       |        |         |
|-------|--------|---------|
| 2. 3  | 25     | 54      |
| 2. 3  | 4      | 24      |
| 2. 2  | 42     | 12      |
| 2. 07 | 12     | 9       |
| 2. 34 | 11     | 9       |
| 2. 15 | 27     | 9       |
| 2. 36 | 5. 84  | 21. 11  |
| 1. 85 | 12     | 9       |
| 2. 21 | 4      | 43      |
| 2. 21 | 1      | 168     |
| 2. 6  | 24     | 21      |
| 2. 08 | 1. 8   | 15. 27  |
| 2. 55 | 3. 07  | 178. 9  |
| 2. 24 | 3. 36  | 23. 96  |
| 2. 08 | 1. 48  | 11      |
| 2. 02 | 1      | 8       |
| 2. 37 | 8. 52  | 13. 39  |
| 2. 4  | 2. 27  | 6       |
| 1. 88 | 1. 85  | 343. 87 |
| 2. 53 | 83. 81 | 398. 1  |
| 2. 32 | 7. 41  | 16. 19  |
| 2. 14 | 2. 14  | 201. 2  |
| 1. 96 | 0. 71  | 189. 9  |
| 2. 1  | 2. 26  | 8. 13   |
| 2. 06 | 137. 3 | 1506    |
| 1. 64 | 4. 83  | 10. 42  |
| 1. 97 | 1. 92  | 29. 27  |
| 1. 71 | 8. 88  | 22      |
| 2. 04 | 1. 91  | 5. 68   |
| 2. 09 | 14. 02 | 32      |
| 2. 23 | 4. 38  | 10. 61  |
| 2. 35 | 9. 85  | 11. 45  |
| 2. 11 | 29. 88 | 12      |
| 2. 16 | 12. 36 | 21      |
| 2. 11 | 4. 57  | 17. 3   |
| 2. 05 | 4      | 16      |
| 2. 04 | 32. 51 | 61      |
| 2. 06 | 0. 67  | 31      |
| 2. 3  | 32     | 22      |
| 2. 4  | 1      | 21      |
| 2. 3  | 25     | 7       |
| 2. 5  | 14     | 44      |
| 2. 5  | 21     | 7       |
| 2     | 1      | 30      |
| 2. 49 | 101    | 197     |
| 2. 25 | 1      | 9       |
| 2. 11 | 1      | 13      |
| 1. 62 | 2      | 11      |
| 2. 13 | 43     | 22      |
| 2. 45 | 8      | 66      |
| 2. 16 | 57     | 590     |

|       |        |        |
|-------|--------|--------|
| 2. 2  | 288. 7 | 225. 2 |
| 2. 35 | 12     | 7      |
| 2. 33 | 2      | 32     |
| 2. 15 | 4. 37  | 9. 77  |
| 2. 51 | 19. 3  | 43. 11 |
| 2. 18 | 171. 6 | 6      |
| 2. 42 | 1. 08  | 5. 56  |
| 2. 24 | 2. 53  | 33. 98 |
| 2. 11 | 30. 07 | 8      |
| 2. 5  | 30. 49 | 17. 71 |
| 2. 54 | 2. 2   | 15. 84 |
| 2. 61 | 19. 27 | 15. 3  |
| 2. 4  | 77. 28 | 66. 8  |
| 2. 23 | 12     | 8      |
| 2. 28 | 4      | 6      |
| 2. 01 | 0. 68  | 72. 64 |
| 2. 7  | 2. 51  | 9      |
| 2. 15 | 5. 17  | 348. 9 |
| 2     | 3. 6   | 10. 82 |
| 2. 72 | 4. 86  | 4. 41  |
| 2. 25 | 30. 21 | 62     |
| 2. 62 | 42     | 108    |
| 2. 2  | 21     | 8      |
| 2. 21 | 3. 62  | 19. 21 |
| 2. 36 | 2. 36  | 21     |
| 2. 03 | 312    | 22     |
| 1. 93 | 12. 5  | 17. 69 |
| 1. 83 | 66. 67 | 386. 4 |
| 2. 14 | 0. 84  | 11. 24 |
| 2. 15 | 2. 96  | 17. 26 |
| 2. 55 | 2. 65  | 5. 73  |
| 2. 3  | 25     | 6      |
| 2. 3  | 43     | 34     |
| 2. 4  | 32     | 21     |
| 2. 3  | 2      | 54     |
| 1. 92 | 1      | 32     |
| 1. 79 | 4      | 11     |
| 2. 24 | 21     | 49     |
| 2. 19 | 4. 15  | 42. 36 |
| 2. 35 | 201. 3 | 10. 15 |
| 2. 56 | 4      | 32     |
| 2. 21 | 4      | 9      |
| 2. 07 | 1      | 77     |
| 2. 37 | 1. 7   | 8      |
| 2. 43 | 85. 94 | 22. 55 |
| 2. 21 | 42. 98 | 7      |
| 2. 21 | 48. 12 | 16. 42 |
| 2. 38 | 3. 29  | 8      |
| 2. 59 | 4. 27  | 34. 23 |
| 2. 55 | 7      | 8      |
| 2. 46 | 23     | 61     |

|       |        |         |
|-------|--------|---------|
| 2. 14 | 6. 88  | 488. 83 |
| 2. 3  | 3424   | 77      |
| 2. 37 | 8. 02  | 85. 44  |
| 2. 47 | 1. 12  | 45. 29  |
| 2     | 25. 78 | 12      |
| 2. 13 | 2. 68  | 23. 35  |
| 2. 21 | 2. 53  | 14      |
| 2     | 4. 28  | 20. 82  |
| 2. 17 | 6. 15  | 32      |
| 2. 28 | 80. 8  | 198. 1  |
| 2. 52 | 144    | 207     |
| 2. 4  | 4. 9   | 10. 71  |
| 1. 76 | 5. 43  | 21      |
| 2. 25 | 1. 92  | 7. 79   |
| 2. 02 | 3. 72  | 153     |
| 2. 13 | 6. 8   | 19. 99  |
| 1. 95 | 1. 29  | 1. 69   |
| 2. 18 | 11. 33 | 32      |
| 2. 17 | 2. 66  | 12      |
| 2. 4  | 25     | 8       |
| 2. 2  | 1      | 4       |
| 2. 3  | 14     | 7       |
| 2. 3  | 4      | 9       |
| 2. 2  | 1      | 36      |
| 2. 22 | 3      | 66      |
| 1. 93 | 4      | 11      |
| 2. 2  | 8      | 179     |
| 2. 54 | 18     | 21      |
| 2. 32 | 52     | 76      |
| 2. 14 | 3      | 43      |
| 1. 99 | 4      | 33      |
| 2. 2  | 33. 66 | 65. 18  |
| 2. 04 | 13. 73 | 144. 2  |
| 2. 01 | 24     | 7       |
| 1. 99 | 3      | 156     |
| 2. 2  | 510    | 124. 6  |
| 2. 4  | 1. 8   | 7       |
| 2. 36 | 4. 87  | 357. 9  |
| 2. 4  | 30. 17 | 44. 2   |
| 2. 48 | 35. 37 | 31. 1   |
| 2. 32 | 2. 53  | 7. 05   |
| 2. 08 | 1. 24  | 20. 76  |
| 2. 31 | 1. 3   | 8       |
| 2. 09 | 4      | 8       |
| 2. 38 | 17. 3  | 4       |
| 2. 12 | 54     | 9       |
| 2. 4  | 4. 59  | 320. 09 |
| 2. 45 | 1      | 199     |
| 2. 11 | 1000   | 127. 2  |
| 2. 03 | 3. 49  | 42. 14  |
| 1. 67 | 1. 73  | 86. 63  |

|       |        |        |
|-------|--------|--------|
| 2. 16 | 3. 97  | 26. 56 |
| 2. 14 | 20. 57 | 22. 03 |
| 2. 15 | 19. 43 | 35. 85 |
| 2. 5  | 13. 25 | 26. 77 |
| 2. 24 | 5566   | 280. 8 |
| 2. 3  | 3. 29  | 22. 92 |
| 2. 37 | 2. 66  | 21     |
| 2. 14 | 2. 99  | 1970   |
| 2. 41 | 1. 93  | 20. 38 |
| 2. 1  | 3. 35  | 17. 11 |
| 1. 9  | 2      | 23     |
| 2. 14 | 7      | 33     |
| 1. 82 | 8. 91  | 7      |
| 2. 27 | 12     | 22     |
| 2. 15 | 23     | 23     |
| 2. 21 | 2. 17  | 42. 87 |
| 2. 24 | 14     | 7      |
| 2. 51 | 1      | 25     |
| 2. 47 | 12     | 76     |
| 2. 42 | 1. 34  | 8. 54  |
| 2. 2  | 3. 66  | 21. 05 |
| 2. 44 | 6. 66  | 48. 65 |
| 2. 11 | 3. 4   | 36. 07 |
| 2. 35 | 6. 11  | 30. 7  |
| 2. 34 | 4      | 9      |
| 2. 38 | 1. 78  | 31. 17 |
| 2. 43 | 3. 78  | 15. 89 |
| 2. 38 | 11. 96 | 31. 95 |
| 2. 26 | 4      | 9      |
| 2. 58 | 1. 24  | 750    |
| 2. 23 | 1      | 7      |
| 2. 33 | 4. 35  | 74. 28 |
| 2. 16 | 1. 3   | 16. 8  |
| 2. 28 | 4      | 64     |
| 2. 1  | 1. 18  | 31. 37 |
| 2. 41 | 3. 01  | 18. 38 |
| 2. 01 | 6. 65  | 13     |
| 2. 18 | 0. 8   | 149. 9 |
| 2. 15 | 8. 06  | 35     |
| 2     | 4. 54  | 21     |
| 2. 12 | 2. 01  | 26. 32 |
| 2. 33 | 8. 56  | 10. 11 |
| 2. 48 | 2. 87  | 69. 62 |
| 2. 4  | 32     | 21     |
| 2. 2  | 3      | 14     |
| 1. 92 | 3. 23  | 6      |
| 2. 3  | 9      | 43     |
| 2. 3  | 12     | 7      |
| 2. 3  | 23     | 21     |
| 2. 3  | 1      | 56     |
| 2. 3  | 1050   | 1200   |

|      |       |       |
|------|-------|-------|
| 2    | 14    | 228   |
| 2.2  | 552   | 349   |
| 2.08 | 69    | 9     |
| 1.78 | 4     | 22    |
| 2.16 | 106   | 22    |
| 2.83 | 22    | 6     |
| 2.07 | 4.36  | 81.58 |
| 2.29 | 2     | 21    |
| 2.23 | 3     | 14    |
| 2.2  | 1     | 9     |
| 2.1  | 9.52  | 15.11 |
| 2.19 | 6.6   | 12    |
| 2.35 | 3.03  | 23.66 |
| 2.34 | 2.43  | 10.62 |
| 2.13 | 3.19  | 11.73 |
| 2.53 | 413.9 | 22.73 |
| 2.1  | 4     | 8     |
| 2.28 | 3.09  | 7.11  |
| 2.24 | 4     | 9     |
| 2.16 | 4.02  | 12.81 |
| 2.39 | 13.9  | 36.41 |
| 2.5  | 1.53  | 13.33 |
| 2.8  | 19.69 | 1200  |
| 2.04 | 43.95 | 123   |
| 1.87 | 8.68  | 887.7 |
| 2.4  | 67.41 | 77.15 |
| 2.12 | 2.57  | 17.32 |
| 2.51 | 2.24  | 6.77  |
| 1.89 | 2.9   | 32    |
| 2.23 | 3.32  | 12    |
| 1.94 | 2.63  | 24.13 |
| 2.34 | 10.95 | 32.57 |
| 1.93 | 3.17  | 19.97 |
| 1.95 | 4.09  | 104.1 |
| 2.05 | 13.38 | 85.02 |
| 2.24 | 6.13  | 29.43 |
| 2.16 | 3.42  | 22    |
| 2.25 | 63.23 | 184.3 |
| 2.2  | 23    | 12    |
| 2.3  | 1     | 32    |
| 2.3  | 41    | 9     |
| 2.6  | 12    | 22    |
| 2.3  | 12    | 8     |
| 2.1  | 105   | 586   |
| 2.32 | 6     | 71    |
| 2.33 | 2     | 7     |
| 2.31 | 45    | 54    |
| 2.28 | 14    | 4     |
| 2.25 | 4     | 12    |
| 2.12 | 4     | 51    |
| 2.3  | 78.34 | 42.64 |

|       |        |        |
|-------|--------|--------|
| 2. 24 | 65     | 21     |
| 2. 28 | 230. 3 | 9      |
| 2. 47 | 43. 89 | 30. 23 |
| 2. 29 | 13. 08 | 21. 01 |
| 2. 56 | 4      | 9      |
| 2. 34 | 2. 12  | 33. 84 |
| 2. 2  | 5. 32  | 12. 14 |
| 2. 01 | 23. 6  | 29. 88 |
| 2. 02 | 1      | 46     |
| 2. 47 | 1      | 40     |
| 2     | 2. 17  | 19. 71 |
| 2. 42 | 2. 31  | 9      |
| 2. 43 | 3      | 7      |
| 2. 15 | 0. 96  | 87. 03 |
| 2. 12 | 169. 5 | 739    |
| 1. 95 | 135    | 106. 3 |
| 2. 24 | 77. 55 | 15     |
| 2. 23 | 43. 97 | 21. 19 |
| 2. 43 | 4. 02  | 54. 14 |
| 2. 33 | 37. 83 | 196. 3 |
| 1. 95 | 26. 37 | 32     |
| 1. 78 | 150. 8 | 544. 2 |
| 2. 37 | 36. 13 | 44. 34 |
| 2. 09 | 1. 37  | 12. 09 |
| 2. 12 | 23. 1  | 21     |
| 2. 36 | 1. 98  | 25. 54 |
| 2     | 330. 4 | 439. 5 |
| 2. 43 | 4      | 23     |
| 2. 13 | 49. 46 | 85. 91 |
| 2. 3  | 1      | 16     |
| 2. 3  | 2      | 112    |
| 2. 2  | 3      | 9      |
| 2. 4  | 1      | 8      |
| 2. 3  | 31     | 22     |
| 2. 33 | 43     | 34     |
| 2. 3  | 25     | 43     |
| 2. 17 | 73. 97 | 8      |
| 2. 16 | 15     | 23     |
| 2. 2  | 17. 95 | 9      |
| 2. 21 | 88     | 143    |
| 2. 2  | 5      | 53     |
| 2. 63 | 89     | 205    |
| 2. 29 | 205    | 174    |
| 2. 7  | 1      | 224    |
| 2. 57 | 7. 53  | 36. 31 |
| 2. 46 | 3. 22  | 35. 78 |
| 2. 06 | 521. 1 | 113. 5 |
| 2. 1  | 150. 9 | 31. 6  |
| 2. 39 | 3. 48  | 31. 93 |
| 2. 2  | 1. 15  | 122. 3 |
| 2. 41 | 1. 26  | 24. 49 |

|       |        |        |
|-------|--------|--------|
| 2. 54 | 3. 64  | 47. 03 |
| 2. 26 | 34     | 9      |
| 2. 34 | 34     | 6      |
| 2. 14 | 4      | 7      |
| 2. 36 | 2. 34  | 8      |
| 2. 25 | 1050   | 725    |
| 2. 1  | 34     | 23     |
| 2. 39 | 2. 81  | 12. 6  |
| 2. 01 | 2. 25  | 11. 2  |
| 2. 19 | 1. 68  | 17. 65 |
| 2. 09 | 2. 26  | 68. 53 |
| 2. 1  | 2. 5   | 6. 56  |
| 2. 17 | 3. 17  | 12     |
| 1. 91 | 13. 74 | 12. 23 |
| 2. 07 | 2. 41  | 12     |
| 1. 91 | 2. 94  | 31     |
| 2. 2  | 1      | 21     |
| 2. 2  | 21     | 32     |
| 2. 3  | 32     | 3      |
| 2. 4  | 2      | 9      |
| 2. 4  | 31     | 34     |
| 1. 92 | 23     | 77     |
| 1. 88 | 2      | 7      |
| 2. 61 | 119    | 9      |
| 1. 91 | 4      | 17     |
| 2. 02 | 1      | 64     |
| 2. 62 | 189. 3 | 135. 9 |
| 2. 45 | 1. 63  | 155. 1 |
| 2. 25 | 7. 36  | 11. 88 |
| 2. 35 | 406. 2 | 56. 79 |
| 2. 38 | 1. 79  | 21. 36 |
| 1. 86 | 12. 21 | 7      |
| 2. 63 | 2. 12  | 87     |
| 2. 41 | 2. 75  | 5. 05  |
| 2. 44 | 1. 73  | 4. 74  |
| 2. 45 | 87. 91 | 10. 86 |
| 1. 95 | 13. 55 | 294. 3 |
| 2. 05 | 45. 44 | 53     |
| 2. 27 | 20. 77 | 322. 6 |
| 2. 29 | 157    | 122. 1 |
| 2. 52 | 106. 2 | 345. 9 |
| 2. 16 | 6. 91  | 8. 14  |
| 2. 22 | 3. 24  | 14. 53 |
| 1. 94 | 0. 98  | 50. 25 |
| 1. 88 | 0. 74  | 24. 07 |
| 2. 23 | 20. 41 | 6      |
| 2. 14 | 1. 49  | 58. 09 |
| 2. 3  | 34     | 21     |
| 2. 3  | 2      | 36     |
| 2. 8  | 23     | 9      |
| 2. 18 | 4. 95  | 40. 06 |

|       |        |         |
|-------|--------|---------|
| 2. 24 | 3. 16  | 5. 07   |
| 2. 34 | 12     | 6       |
| 1. 82 | 3      | 27      |
| 2     | 14     | 8       |
| 2. 27 | 2. 72  | 13. 64  |
| 2. 32 | 3. 64  | 6       |
| 2. 52 | 17. 06 | 28. 48  |
| 2. 43 | 3. 13  | 29. 83  |
| 2. 35 | 1. 23  | 40. 27  |
| 2. 29 | 25. 27 | 99. 78  |
| 2. 29 | 8. 67  | 8       |
| 2. 17 | 1. 62  | 123. 33 |
| 2. 15 | 4      | 32      |
| 2. 36 | 3. 62  | 87      |
| 2. 3  | 5. 59  | 36. 95  |
| 1. 87 | 12     | 32      |
| 2. 51 | 36. 66 | 438     |
| 2. 37 | 2. 69  | 30. 65  |
| 2. 45 | 1. 6   | 22. 56  |
| 2. 14 | 2. 51  | 21      |
| 1. 9  | 43. 31 | 49. 81  |
| 2. 03 | 3      | 68. 49  |
| 2. 17 | 3. 61  | 23. 8   |
| 2. 16 | 0. 73  | 8. 91   |
| 2. 38 | 52. 02 | 21      |
| 2. 42 | 5. 06  | 90. 16  |
| 2. 2  | 3. 25  | 115. 2  |
| 2. 15 | 260. 9 | 48. 38  |
| 2. 16 | 5. 34  | 25      |
| 2     | 12     | 17      |
| 2. 1  | 21     | 21      |
| 2. 5  | 43     | 6       |
| 2. 4  | 2      | 9       |
| 2. 2  | 42     | 23      |
| 2. 8  | 12     | 54      |
| 2. 5  | 1      | 47      |
| 2. 46 | 42     | 32      |
| 2. 25 | 3      | 43      |
| 2. 29 | 106. 8 | 25. 08  |
| 2. 24 | 0. 92  | 38. 67  |
| 2. 16 | 7. 95  | 15. 47  |
| 2. 1  | 66     | 9       |
| 2. 24 | 2. 23  | 51. 47  |
| 2. 26 | 1. 61  | 32. 42  |
| 2. 37 | 1. 93  | 23. 31  |
| 2. 4  | 3. 03  | 13. 79  |
| 2. 45 | 0. 79  | 14. 62  |
| 2. 58 | 8. 36  | 14. 59  |
| 2. 26 | 1. 43  | 192. 3  |
| 2. 32 | 1. 69  | 12. 69  |
| 1. 93 | 1      | 8       |



|       |        |         |
|-------|--------|---------|
| 2. 01 | 4      | 91      |
| 2. 22 | 31. 2  | 9. 26   |
| 1. 77 | 8      | 7       |
| 2. 14 | 2. 87  | 15. 86  |
| 2. 02 | 73. 15 | 181. 73 |
| 2. 14 | 12. 43 | 66. 59  |
| 2. 17 | 3. 49  | 49. 95  |
| 2. 31 | 13     | 21      |
| 2. 52 | 3. 27  | 10. 64  |
| 2. 03 | 191. 9 | 22. 9   |
| 1. 89 | 2. 12  | 24      |
| 2     | 7. 7   | 94. 96  |
| 2. 07 | 5. 59  | 21      |
| 2. 08 | 6. 7   | 10. 22  |
| 1. 95 | 1. 37  | 141. 4  |
| 2. 03 | 34     | 22      |
| 2. 15 | 4      | 52      |
| 2. 6  | 105    | 7       |
| 2. 3  | 3      | 32      |
| 2. 5  | 2      | 4       |
| 2. 3  | 32     | 32      |
| 1. 88 | 1      | 66      |
| 2. 24 | 5      | 8       |
| 2. 21 | 35     | 9       |
| 2. 27 | 1      | 80      |
| 2. 5  | 69. 9  | 126. 1  |
| 2. 57 | 3      | 43      |
| 2. 23 | 1      | 56      |
| 2. 55 | 21     | 21      |
| 2. 14 | 28     | 9       |
| 2. 12 | 11     | 9       |
| 2. 11 | 3      | 98      |
| 2. 17 | 13     | 8       |
| 2. 44 | 3. 26  | 14. 78  |
| 2. 47 | 1. 01  | 182. 25 |
| 2. 85 | 4. 29  | 22. 85  |
| 2. 02 | 2. 3   | 33. 62  |
| 2. 31 | 12     | 24      |
| 2. 66 | 0. 64  | 231. 05 |
| 2. 19 | 2. 67  | 31. 88  |
| 2. 16 | 2. 14  | 31. 77  |
| 2. 3  | 45. 64 | 189     |
| 2. 03 | 3. 45  | 12. 97  |
| 2. 31 | 3. 23  | 3. 13   |
| 2. 33 | 2. 43  | 12. 63  |
| 2. 12 | 6. 54  | 42      |
| 2. 06 | 57. 49 | 45. 04  |
| 2. 15 | 7. 23  | 13. 57  |
| 2. 26 | 14. 64 | 10. 44  |
| 2. 15 | 5. 34  | 21      |
| 2. 03 | 2. 46  | 24. 14  |

|       |        |         |
|-------|--------|---------|
| 2. 03 | 2. 62  | 36. 04  |
| 2. 15 | 5. 12  | 250. 6  |
| 2. 25 | 4. 32  | 43      |
| 2. 1  | 6      | 35      |
| 2. 2  | 21     | 32      |
| 2. 8  | 12     | 8       |
| 2. 2  | 53     | 24      |
| 2     | 18     | 124     |
| 2. 28 | 42     | 43      |
| 1. 91 | 4      | 9       |
| 2. 41 | 468. 5 | 56. 09  |
| 1. 88 | 31. 87 | 300. 2  |
| 2. 34 | 1      | 6       |
| 2. 37 | 31     | 9       |
| 2. 29 | 105    | 29      |
| 3. 29 | 38. 54 | 45. 52  |
| 2. 44 | 221    | 7. 29   |
| 2. 81 | 3. 95  | 59. 51  |
| 2. 34 | 14. 88 | 66. 62  |
| 2. 14 | 5. 47  | 61. 47  |
| 2. 03 | 16     | 5       |
| 2. 41 | 2. 44  | 119. 1  |
| 2. 28 | 2. 87  | 84. 53  |
| 2. 42 | 9      | 68. 27  |
| 2. 4  | 2. 34  | 7. 16   |
| 2. 24 | 1. 75  | 181. 57 |
| 2. 05 | 8      | 7       |
| 2. 01 | 31     | 32      |
| 2. 14 | 51     | 45      |
| 2. 22 | 2. 82  | 7. 47   |
| 2. 32 | 0. 52  | 8. 35   |
| 1. 9  | 72     | 68      |
| 2. 4  | 12. 75 | 11. 04  |
| 2. 18 | 23. 37 | 11. 98  |
| 1. 92 | 9. 67  | 36. 61  |
| 2     | 276. 8 | 113. 6  |
| 1. 59 | 1138   | 18      |
| 2. 42 | 8. 99  | 92. 52  |
| 1. 74 | 2. 39  | 7       |
| 2. 38 | 1. 94  | 12      |
| 2. 47 | 7. 31  | 35. 83  |
| 3. 4  | 14     | 22      |
| 2. 3  | 2      | 250     |
| 2. 3  | 8      | 49      |
| 2. 3  | 69     | 15      |
| 2. 2  | 9      | 431     |
| 2. 02 | 5      | 1054    |
| 2. 25 | 86     | 535     |
| 2. 7  | 13     | 43      |
| 2. 34 | 135. 8 | 37. 87  |
| 1. 97 | 16. 41 | 65. 77  |

|       |        |        |
|-------|--------|--------|
| 2. 27 | 6. 4   | 155. 3 |
| 2. 07 | 12     | 9      |
| 2. 53 | 3      | 9      |
| 2. 23 | 5      | 9      |
| 2. 29 | 3. 27  | 9      |
| 2. 24 | 7. 6   | 14. 66 |
| 2. 26 | 21     | 7      |
| 2. 26 | 8. 75  | 26. 16 |
| 2. 34 | 4. 06  | 6. 46  |
| 2. 2  | 3. 66  | 21     |
| 2     | 22     | 6      |
| 2. 13 | 35. 12 | 184. 5 |
| 2. 24 | 5. 98  | 32     |
| 2. 15 | 6. 91  | 70     |
| 2. 06 | 3. 95  | 23. 71 |
| 2. 26 | 34. 24 | 12     |
| 2. 2  | 44     | 7      |
| 1. 99 | 9      | 13     |
| 2. 1  | 42     | 31     |
| 2. 18 | 873. 2 | 139. 7 |
| 2. 26 | 8. 04  | 33. 82 |
| 2. 33 | 4      | 44     |
| 2. 62 | 4. 19  | 51. 09 |
| 2. 39 | 3. 88  | 10. 22 |
| 2. 31 | 2. 2   | 64. 78 |
| 2. 3  | 2. 46  | 22     |
| 2. 98 | 3. 84  | 14. 64 |
| 2. 32 | 3. 21  | 9      |
| 2. 33 | 24. 02 | 716. 6 |
| 2. 21 | 38     | 1200   |
| 2. 03 | 4. 73  | 8. 04  |
| 2. 29 | 268. 9 | 21. 55 |
| 2. 23 | 6. 21  | 130. 1 |
| 2. 22 | 4. 32  | 39. 73 |
| 2. 08 | 2. 68  | 47. 24 |
| 2. 25 | 1. 99  | 5      |
| 2. 3  | 24     | 9      |
| 2. 3  | 21     | 4      |
| 3. 01 | 1      | 24     |
| 2. 13 | 4      | 7      |
| 2. 04 | 1      | 13     |
| 2. 16 | 4. 63  | 136. 5 |
| 2. 21 | 4      | 9      |
| 1. 87 | 1      | 16     |
| 2. 3  | 4. 67  | 19. 38 |
| 2. 52 | 5. 03  | 27. 3  |
| 2. 35 | 6. 87  | 7      |
| 1. 9  | 3. 35  | 6      |
| 2. 35 | 2      | 19     |
| 2. 05 | 25     | 6      |
| 2. 13 | 2. 43  | 8      |

|      |        |        |
|------|--------|--------|
| 2.71 | 2.79   | 142.34 |
| 2.3  | 1      | 99     |
| 2.02 | 2.05   | 63.2   |
| 2.02 | 12.93  | 249.1  |
| 2.13 | 7.6    | 91     |
| 2.06 | 51.02  | 518.7  |
| 2.22 | 13.19  | 30.11  |
| 2.17 | 7.12   | 13.62  |
| 1.99 | 2.7    | 22     |
| 1.96 | 24.05  | 42.27  |
| 2.3  | 1050   | 1200   |
| 2.2  | 2      | 15     |
| 2.1  | 14     | 9      |
| 1.96 | 2      | 9      |
| 2.2  | 4      | 416    |
| 2.42 | 126.2  | 51.49  |
| 1.89 | 11.76  | 120.1  |
| 2.38 | 5      | 12     |
| 2.25 | 31     | 22     |
| 2.24 | 12     | 23     |
| 2.26 | 28.35  | 150.9  |
| 2.22 | 13.68  | 28.28  |
| 0.49 | 6.69   | 5.92   |
| 2.18 | 1      | 13     |
| 2.77 | 31     | 32.97  |
| 2.33 | 31     | 21     |
| 2.72 | 2.08   | 8      |
| 2.11 | 216.17 | 48.38  |
| 2.22 | 1.2    | 31.81  |
| 2    | 12     | 8      |
| 2.11 | 8.53   | 54     |
| 2.17 | 36.34  | 63.03  |
| 2.26 | 3.84   | 8.33   |
| 2.15 | 19.93  | 15     |
| 2.09 | 186.8  | 22     |
| 2.41 | 6.24   | 37.25  |
| 1.71 | 7.2    | 15     |
| 2    | 1.93   | 21     |
| 2.11 | 3.81   | 22.91  |
| 2.15 | 5.28   | 11.35  |
| 2.09 | 8.64   | 3.21   |
| 2.13 | 2.45   | 42     |
| 2.3  | 2      | 53     |
| 2.3  | 105    | 32     |
| 2.3  | 2      | 52     |
| 1.91 | 1      | 10     |
| 1.9  | 23     | 32     |
| 2.42 | 19     | 35     |
| 2.34 | 14     | 18     |
| 2.33 | 7.15   | 31.5   |
| 2.15 | 7      | 174    |

|       |        |        |
|-------|--------|--------|
| 2. 13 | 2      | 34     |
| 2. 25 | 2      | 126    |
| 2. 42 | 1. 03  | 23     |
| 2. 16 | 3. 18  | 135. 9 |
| 2. 37 | 55     | 21     |
| 2. 02 | 2. 06  | 74. 46 |
| 2. 11 | 2. 07  | 4. 77  |
| 2. 01 | 1. 17  | 18. 2  |
| 2. 29 | 3. 7   | 13     |
| 2. 3  | 4. 67  | 4      |
| 2. 12 | 15. 2  | 32     |
| 2. 5  | 2      | 15     |
| 2. 3  | 1      | 49     |
| 2. 2  | 17     | 21     |
| 2. 4  | 2      | 9      |
| 2. 7  | 3      | 32     |
| 2. 3  | 3      | 34     |
| 2. 29 | 6. 18  | 35. 69 |
| 2. 19 | 107. 3 | 16. 46 |
| 2. 41 | 1      | 41     |
| 2. 41 | 2. 44  | 32     |
| 2. 26 | 4. 07  | 15. 78 |
| 1. 98 | 15     | 1022   |
| 2. 12 | 1. 99  | 7. 8   |
| 2. 41 | 26     | 40     |
| 2. 79 | 2      | 3      |
| 2. 32 | 104. 5 | 31. 95 |
| 2. 38 | 23. 82 | 8. 97  |
| 2. 22 | 3. 44  | 62. 92 |
| 2. 38 | 272. 5 | 26     |
| 2. 05 | 3. 24  | 61. 09 |
| 2. 14 | 7. 1   | 7. 25  |
| 2. 13 | 1. 67  | 144    |
| 2. 15 | 9. 99  | 7. 91  |
| 2. 03 | 18. 85 | 100. 6 |
| 1. 9  | 7      | 46     |
| 2. 1  | 2      | 32     |
| 1. 9  | 3. 13  | 13. 06 |
| 2. 3  | 26     | 3      |
| 2. 26 | 8      | 52     |
| 1. 77 | 7      | 10     |
| 2. 29 | 125    | 8      |
| 2. 1  | 235. 5 | 21     |
| 2. 1  | 2. 54  | 52. 53 |
| 2. 08 | 32     | 32     |
| 2. 01 | 21     | 21     |
| 2. 35 | 2. 14  | 8. 86  |
| 2. 22 | 43. 61 | 24. 1  |
| 2. 37 | 1. 57  | 32. 49 |
| 2. 14 | 3. 58  | 6      |
| 2. 31 | 4      | 3      |

|      |       |        |
|------|-------|--------|
| 2.14 | 8.41  | 88.95  |
| 2.01 | 2.17  | 24     |
| 2.13 | 3     | 43     |
| 2.65 | 2.28  | 92     |
| 3.91 | 12.35 | 19.85  |
| 2.2  | 11    | 314.32 |
| 2.32 | 176.9 | 627.5  |
| 1.89 | 1.22  | 85.98  |
| 2.37 | 3.07  | 17.53  |
| 2.24 | 4.55  | 27     |
| 2.13 | 25.71 | 27.64  |
| 2.5  | 21    | 9      |
| 2    | 16    | 31     |
| 2.18 | 14    | 7      |
| 2.25 | 11.14 | 7      |
| 2.3  | 82.69 | 86.32  |
| 2.16 | 25.56 | 19.47  |
| 2.4  | 2.98  | 11     |
| 2.55 | 1.41  | 11.28  |
| 2.05 | 11.14 | 65     |
| 2.32 | 19.59 | 25.13  |
| 2.32 | 37.74 | 318.1  |
| 2.12 | 5.67  | 15.41  |
| 2.08 | 2.26  | 30.79  |
| 2.05 | 97.07 | 62.45  |
| 2.31 | 2.75  | 22.25  |
| 2.3  | 624.5 | 548.3  |
| 2.3  | 9     | 9      |
| 2.2  | 28    | 9      |
| 1.83 | 12    | 21     |
| 1.77 | 31    | 32     |
| 2.52 | 48.33 | 39.82  |
| 2.07 | 210.6 | 75.92  |
| 1.85 | 2.1   | 75.06  |
| 1.93 | 4.98  | 35.37  |
| 2.48 | 809.7 | 28.91  |
| 2.35 | 7.93  | 11.03  |
| 2.01 | 5.9   | 7      |
| 2.01 | 373.4 | 188.3  |
| 2.4  | 2.54  | 41     |
| 2.06 | 54    | 23     |
| 2.3  | 23    | 9      |
| 1.94 | 12    | 6      |
| 2.09 | 21    | 7      |
| 1.84 | 12.64 | 53.53  |
| 2.66 | 50    | 4      |
| 1.92 | 2.6   | 53.83  |
| 2.48 | 105   | 9      |
| 1.9  | 8     | 6      |
| 2.28 | 3.76  | 31.7   |
| 2.26 | 2     | 28     |

|       |        |         |
|-------|--------|---------|
| 2. 28 | 78. 94 | 50. 23  |
| 2. 2  | 1. 2   | 41. 16  |
| 1. 8  | 3. 71  | 42. 32  |
| 2. 48 | 0. 92  | 8       |
| 2. 16 | 2. 1   | 8. 38   |
| 2. 38 | 1. 69  | 12      |
| 2. 15 | 13. 69 | 293. 3  |
| 2. 39 | 17. 29 | 19. 17  |
| 2. 2  | 40. 6  | 29      |
| 2. 4  | 1. 62  | 14. 57  |
| 2. 4  | 5. 18  | 925. 06 |
| 2. 08 | 1. 86  | 17. 52  |
| 2. 32 | 2. 12  | 8       |
| 2. 24 | 1      | 159. 48 |
| 2     | 10. 52 | 67. 53  |
| 1. 95 | 3      | 22      |
| 2. 1  | 53     | 21      |
| 2. 2  | 1      | 8       |
| 2. 3  | 31     | 8       |
| 2. 04 | 41     | 11      |
| 1. 9  | 21     | 51      |
| 2. 08 | 1      | 9       |
| 2. 06 | 23     | 13      |
| 2. 1  | 32     | 15      |
| 2. 38 | 1. 18  | 30. 55  |
| 2. 28 | 1      | 54      |
| 2. 3  | 3. 76  | 38      |
| 2. 02 | 12. 53 | 250. 5  |
| 2. 3  | 11     | 11      |
| 2. 29 | 2. 46  | 27. 05  |
| 2. 01 | 10. 35 | 22. 8   |
| 2. 32 | 1. 34  | 21      |
| 1. 94 | 0. 99  | 97. 06  |
| 1. 98 | 283    | 186     |
| 2. 38 | 12     | 24      |
| 2. 37 | 16     | 21      |
| 2. 29 | 18. 96 | 23. 54  |
| 1. 56 | 6. 62  | 434. 3  |
| 2. 17 | 4      | 21      |
| 2. 35 | 7      | 8       |
| 2. 35 | 14. 19 | 9       |
| 2. 3  | 64     | 65      |
| 2. 37 | 18. 74 | 40. 78  |
| 2. 14 | 1. 17  | 16. 47  |
| 2. 08 | 0. 69  | 75. 53  |
| 2. 3  | 47     | 160     |
| 2. 3  | 10     | 121     |
| 2. 1  | 1000   | 27      |
| 2. 16 | 1      | 22      |
| 2. 23 | 1      | 71      |
| 2. 36 | 17. 68 | 30. 36  |

|      |       |       |
|------|-------|-------|
| 2.38 | 23    | 4     |
| 2    | 1.25  | 1200  |
| 2.2  | 31    | 28    |
| 2.03 | 5.99  | 429.8 |
| 2.3  | 54    | 9     |
| 2.24 | 4     | 14    |
| 2.27 | 69.43 | 6.94  |
| 2.13 | 0.71  | 328.4 |
| 2.13 | 36.07 | 9     |
| 2.9  | 1     | 9     |
| 2.3  | 25    | 46    |
| 2.2  | 40    | 112   |
| 2.3  | 154   | 27    |
| 2.34 | 2     | 109   |
| 2.38 | 12.3  | 12    |
| 2.57 | 27.86 | 841.2 |
| 2.45 | 3     | 44    |
| 2.4  | 1     | 22    |
| 2.1  | 1     | 15    |
| 2.3  | 8.68  | 26.42 |
| 2.16 | 58.8  | 185.6 |
| 2.18 | 11.25 | 68.78 |
| 2.2  | 6601  | 2656  |
| 2.3  | 23    | 41    |
| 2.1  | 81    | 9     |
| 2.3  | 12    | 6     |
| 1.93 | 2.4   | 40.01 |
| 1.82 | 1.47  | 82.02 |
| 2.39 | 70.62 | 43    |
| 2.2  | 60    | 6     |
| 2.1  | 160   | 415   |
| 2.32 | 31    | 9     |
| 2.29 | 37.01 | 98.79 |
| 2.24 | 1.48  | 22.29 |
| 2.16 | 1.77  | 21.28 |
| 1.98 | 43    | 9     |
| 2.1  | 21    | 7     |
| 1.45 | 39    | 129   |
| 2.29 | 50.88 | 81.54 |
| 2.47 | 1.63  | 10.96 |
| 2.06 | 105   | 18.64 |
| 2.46 | 31.23 | 28    |
| 2.46 | 11.1  | 7     |
| 2.22 | 45.57 | 16.37 |
| 2.21 | 21.95 | 39.72 |
| 2.2  | 3.51  | 18.25 |
| 2.22 | 1     | 93.97 |
| 2.22 | 26.86 | 35    |
| 2.33 | 1.66  | 21    |
| 2.28 | 1.12  | 10.42 |
| 2.1  | 1     | 1200  |



|       |         |         |
|-------|---------|---------|
| 2. 1  | 53      | 26      |
| 2. 3  | 6       | 9       |
| 2. 3  | 42      | 8       |
| 2. 1  | 4       | 9       |
| 2. 21 | 65      | 77      |
| 2. 38 | 47      | 334     |
| 2. 49 | 12      | 9       |
| 1. 98 | 4       | 21      |
| 2. 41 | 92. 31  | 323. 3  |
| 2. 07 | 4. 95   | 21      |
| 2. 16 | 86. 86  | 294. 6  |
| 2. 29 | 3. 07   | 32. 76  |
| 2. 22 | 43. 39  | 18. 29  |
| 2. 28 | 73. 4   | 25. 96  |
| 2. 25 | 9       | 100     |
| 2. 17 | 14      | 21      |
| 2. 1  | 25      | 3       |
| 2. 1  | 12. 54  | 86. 34  |
| 2. 36 | 50. 72  | 93. 7   |
| 2. 41 | 243. 5  | 25. 72  |
| 2. 19 | 13      | 5       |
| 2. 18 | 59. 67  | 10. 76  |
| 2. 13 | 3. 23   | 19. 97  |
| 2. 4  | 54. 97  | 223. 8  |
| 1. 92 | 14      | 7       |
| 2. 25 | 1       | 33      |
| 2. 1  | 283. 21 | 462. 68 |
| 2. 2  | 1. 91   | 116. 86 |
| 2. 48 | 135. 7  | 26. 15  |
| 2. 14 | 417. 29 | 317. 15 |
| 2. 17 | 1. 07   | 15. 87  |
| 1. 78 | 12. 5   | 14. 25  |
| 2. 24 | 6. 9    | 9       |
| 2. 21 | 3       | 7       |
| 2. 3  | 14      | 24      |
| 2. 1  | 65      | 9       |
| 1. 91 | 1       | 168     |
| 2. 32 | 2. 37   | 23. 37  |
| 2. 45 | 2. 51   | 55. 05  |
| 2. 31 | 13      | 37      |
| 2. 47 | 4       | 22      |
| 2. 48 | 20. 67  | 21      |
| 1. 9  | 917. 7  | 422. 1  |
| 2. 3  | 5. 68   | 19      |
| 2. 47 | 9. 62   | 24. 35  |
| 2. 15 | 2. 15   | 202     |
| 2. 13 | 0. 91   | 86. 63  |
| 2     | 2. 54   | 42      |
| 2. 1  | 12. 3   | 41      |
| 1. 9  | 239     | 138     |
| 2. 29 | 69. 69  | 19. 17  |

|       |         |        |
|-------|---------|--------|
| 2. 14 | 1. 8    | 32     |
| 2. 2  | 299     | 33     |
| 1. 9  | 23      | 44     |
| 2. 42 | 31      | 32     |
| 2. 25 | 1. 99   | 274. 7 |
| 2. 2  | 4. 37   | 48. 5  |
| 2. 22 | 3. 6    | 77     |
| 2. 17 | 3       | 6      |
| 2. 45 | 4. 02   | 13. 98 |
| 2. 39 | 5. 24   | 7. 8   |
| 2. 29 | 4       | 8      |
| 1. 95 | 1. 4    | 9. 43  |
| 2. 41 | 55. 83  | 7. 15  |
| 2. 44 | 10. 42  | 22. 42 |
| 2. 22 | 925. 99 | 16. 65 |
| 2. 15 | 72. 1   | 37. 04 |
| 2. 18 | 5. 21   | 15     |
| 2     | 4. 61   | 62     |
| 2. 15 | 3. 54   | 149. 6 |
| 2. 34 | 7. 7    | 20. 63 |
| 2. 12 | 9. 13   | 47. 7  |
| 2. 3  | 105     | 9      |
| 2. 3  | 3       | 44     |
| 2. 3  | 21      | 33     |
| 1. 9  | 3       | 6      |
| 2. 13 | 31      | 76     |
| 2     | 1. 62   | 15. 8  |
| 2. 14 | 32      | 51     |
| 2. 18 | 31      | 32     |
| 2. 42 | 0. 93   | 9. 92  |
| 2. 04 | 3. 02   | 102. 9 |
| 2. 14 | 0. 26   | 12     |
| 1. 96 | 2. 34   | 123. 5 |
| 2. 38 | 280. 8  | 109. 2 |
| 2. 05 | 23. 16  | 15. 42 |
| 2. 28 | 40. 33  | 32. 44 |
| 2. 24 | 3. 42   | 38     |
| 2. 6  | 34      | 21     |
| 2. 19 | 8. 05   | 8. 77  |
| 2. 4  | 12      | 21     |
| 2. 11 | 4       | 64     |
| 2. 53 | 8       | 168    |
| 2. 12 | 21      | 9      |
| 2. 3  | 3. 24   | 25. 35 |
| 2. 3  | 3       | 8      |
| 2. 1  | 1. 42   | 42. 85 |
| 2. 03 | 3. 53   | 21     |
| 2. 34 | 27. 26  | 416. 6 |
| 2. 11 | 5. 46   | 21     |
| 2. 4  | 32      | 87     |
| 2. 41 | 3       | 43     |

|       |        |        |
|-------|--------|--------|
| 1. 94 | 21     | 9      |
| 2. 53 | 43     | 44     |
| 2. 5  | 4      | 610    |
| 2. 2  | 8      | 37. 09 |
| 2. 34 | 1. 27  | 10. 71 |
| 2. 38 | 5. 61  | 9      |
| 2. 42 | 70. 71 | 22. 96 |
| 1. 91 | 2. 78  | 26. 54 |
| 2. 32 | 6. 43  | 77. 78 |
| 2. 06 | 303. 9 | 169. 2 |
| 2. 16 | 1      | 61     |
| 2. 37 | 11     | 634    |
| 2. 24 | 3      | 13     |
| 2. 13 | 21     | 52     |
| 2. 22 | 0. 66  | 63. 26 |
| 2. 21 | 29. 33 | 13. 39 |
| 2. 25 | 32     | 9      |
| 2. 13 | 8      | 6      |
| 2. 43 | 13     | 44     |
| 2. 1  | 1. 49  | 8. 4   |
| 2. 2  | 3. 13  | 10. 58 |
| 2. 28 | 16. 15 | 24. 49 |
| 2. 44 | 5. 58  | 16. 66 |
| 2. 47 | 5. 68  | 11. 5  |
| 2. 52 | 23     | 7      |
| 2. 24 | 4      | 8      |
| 2. 07 | 5. 75  | 46. 46 |
| 1. 89 | 14. 06 | 116    |
| 2. 11 | 27. 84 | 222. 7 |
| 2. 04 | 28. 88 | 11. 38 |
| 2. 38 | 12     | 33     |
| 2. 38 | 1000   | 110. 4 |
| 2. 3  | 0. 71  | 34. 39 |
| 2. 42 | 3. 23  | 9. 45  |
| 2. 13 | 12     | 7      |
| 2. 39 | 3. 37  | 8. 97  |
| 1. 98 | 22     | 6      |
| 2. 23 | 56. 85 | 63     |
| 2. 65 | 2. 49  | 23     |
| 2. 14 | 7. 25  | 13. 26 |
| 2. 63 | 3. 22  | 12. 94 |
| 2. 4  | 322    | 755    |
| 1. 9  | 14     | 21     |
| 2. 2  | 13     | 33     |
| 2. 58 | 24     | 75     |
| 2     | 1      | 6      |
| 2. 28 | 0. 73  | 9. 7   |
| 2. 32 | 76. 23 | 19. 76 |
| 2. 53 | 24. 3  | 54. 81 |
| 2. 24 | 4      | 183    |
| 2. 16 | 21     | 33     |

|       |        |         |
|-------|--------|---------|
| 2. 31 | 32     | 23      |
| 2. 6  | 9. 2   | 48. 03  |
| 2. 15 | 2. 16  | 9. 06   |
| 2. 33 | 228. 2 | 162     |
| 2. 43 | 4. 39  | 163. 1  |
| 2. 6  | 86. 06 | 9       |
| 1. 92 | 42     | 62      |
| 2. 37 | 7. 72  | 17. 43  |
| 2. 19 | 3. 02  | 22      |
| 2. 21 | 4. 56  | 14      |
| 2. 4  | 2. 72  | 75. 56  |
| 2. 1  | 2. 46  | 12. 1   |
| 1. 9  | 321    | 32      |
| 1. 9  | 10     | 4       |
| 2. 16 | 8. 06  | 26. 48  |
| 2. 16 | 2      | 186     |
| 2. 24 | 4      | 24      |
| 2     | 12     | 7       |
| 2. 29 | 1219   | 28. 69  |
| 2. 18 | 2. 02  | 38. 84  |
| 2. 27 | 43. 61 | 51. 96  |
| 2. 3  | 12     | 32      |
| 2. 4  | 4      | 8       |
| 2. 53 | 230    | 352     |
| 2. 31 | 85. 03 | 134. 8  |
| 2     | 54     | 9       |
| 2. 2  | 7. 59  | 46. 98  |
| 1. 82 | 16     | 7       |
| 2. 17 | 7. 62  | 565. 08 |
| 2. 11 | 461. 6 | 9       |
| 2. 28 | 114. 6 | 100     |
| 1. 96 | 1. 1   | 37. 11  |
| 2. 25 | 32     | 33      |
| 2. 42 | 1      | 69      |
| 2. 45 | 2. 41  | 7       |
| 2. 31 | 3. 24  | 9       |
| 2. 2  | 1050   | 1200    |
| 2. 55 | 3      | 9       |
| 2. 14 | 3. 78  | 21      |
| 2. 28 | 3. 7   | 37. 83  |
| 2. 06 | 2. 53  | 23      |
| 2. 42 | 23. 4  | 45      |
| 2. 23 | 196    | 80. 93  |
| 2. 5  | 597. 8 | 70. 49  |
| 2. 41 | 4      | 23      |
| 2. 41 | 16. 58 | 17. 57  |
| 2. 16 | 579. 1 | 68      |
| 1. 94 | 1. 73  | 11. 42  |
| 2. 14 | 7. 65  | 123. 5  |
| 2. 13 | 295. 5 | 23. 45  |
| 2. 16 | 2. 08  | 24. 25  |

|       |        |        |
|-------|--------|--------|
| 2. 15 | 22. 42 | 12. 66 |
| 1. 88 | 4. 72  | 9      |
| 2. 14 | 8. 67  | 24. 92 |
| 2. 1  | 1. 62  | 22. 35 |
| 2. 4  | 23. 4  | 158    |
| 2. 3  | 105    | 701    |
| 2. 6  | 6      | 21     |
| 2. 4  | 12     | 55     |
| 2. 47 | 1. 97  | 7. 94  |
| 2. 39 | 4      | 8      |
| 2. 33 | 12     | 7      |
| 2. 27 | 1231   | 1513   |
| 2. 33 | 11. 64 | 57. 4  |
| 2. 25 | 186. 2 | 26. 54 |
| 2. 24 | 2. 8   | 118. 3 |
| 2. 24 | 36. 48 | 21     |
| 1. 99 | 1. 48  | 23. 07 |
| 2. 25 | 33. 48 | 52. 58 |
| 1. 44 | 21     | 9      |
| 2. 3  | 8. 02  | 59. 83 |
| 2. 35 | 2. 31  | 9      |
| 1. 79 | 137. 8 | 115. 8 |
| 1. 87 | 12. 65 | 155. 6 |
| 2. 16 | 4. 87  | 32     |
| 2. 3  | 29. 63 | 71     |
| 2. 1  | 1      | 10     |
| 2. 07 | 43     | 6      |
| 1. 95 | 15     | 215    |
| 2. 24 | 48. 2  | 6      |
| 2. 39 | 1396   | 14. 29 |
| 2. 32 | 25. 24 | 54     |
| 2. 03 | 23     | 7      |
| 2. 55 | 13. 72 | 7      |
| 2. 13 | 1. 14  | 33. 8  |
| 2. 2  | 32     | 32     |
| 1. 85 | 1      | 28     |
| 2. 16 | 43     | 51     |
| 2. 02 | 5. 23  | 44. 17 |
| 2. 31 | 194    | 26     |
| 2. 39 | 2. 4   | 150. 5 |
| 2. 5  | 4      | 23     |
| 2. 27 | 8. 62  | 728    |
| 2. 3  | 12     | 31     |
| 2. 23 | 53     | 116    |
| 1. 97 | 2      | 93     |
| 2. 6  | 8      | 6      |
| 2. 45 | 212. 9 | 869. 2 |
| 2. 21 | 24     | 9      |
| 2. 3  | 841. 6 | 21. 41 |
| 2. 15 | 25. 63 | 88. 15 |
| 2. 15 | 24. 39 | 45. 95 |

|       |         |          |
|-------|---------|----------|
| 2. 09 | 105     | 361      |
| 2. 06 | 1. 47   | 18. 67   |
| 1. 66 | 53. 75  | 21. 15   |
| 2. 47 | 2. 39   | 22       |
| 2. 2  | 10      | 51       |
| 2. 3  | 1       | 8        |
| 2. 7  | 12      | 6        |
| 2. 3  | 3       | 23       |
| 2. 31 | 32      | 43       |
| 2. 09 | 4. 22   | 57. 99   |
| 2. 5  | 1       | 9        |
| 2. 36 | 10. 58  | 22. 89   |
| 2. 32 | 0. 82   | 36. 5    |
| 2. 19 | 3. 73   | 224. 1   |
| 2. 27 | 1. 99   | 14. 19   |
| 2. 3  | 43. 11  | 198. 3   |
| 2. 1  | 2. 26   | 13       |
| 2. 4  | 26. 63  | 32       |
| 2. 46 | 21      | 13       |
| 3     | 4. 32   | 10. 94   |
| 2. 57 | 32      | 8        |
| 1. 98 | 37      | 531      |
| 2. 1  | 54      | 48       |
| 2. 1  | 4. 2    | 78. 15   |
| 2. 14 | 1. 44   | 500      |
| 2. 46 | 2. 54   | 52       |
| 2. 2  | 34      | 21       |
| 2. 4  | 21      | 6        |
| 2. 2  | 5       | 487      |
| 2. 41 | 11      | 38       |
| 2. 1  | 345. 2  | 13. 76   |
| 2. 16 | 1. 28   | 48. 77   |
| 1. 77 | 2. 21   | 18. 52   |
| 2. 09 | 11      | 7        |
| 2. 15 | 4       | 9        |
| 2. 26 | 105     | 77       |
| 2     | 13. 71  | 49. 91   |
| 2. 11 | 53. 87  | 459. 3   |
| 2. 26 | 2. 48   | 8. 36    |
| 2. 16 | 5. 52   | 21       |
| 2. 1  | 3       | 21       |
| 2. 22 | 402     | 78       |
| 2. 35 | 4       | 7        |
| 2. 31 | 15. 55  | 8. 52    |
| 2. 26 | 4. 73   | 126. 8   |
| 2. 46 | 614. 55 | 1169. 44 |
| 2. 2  | 41      | 43       |
| 2. 53 | 59      | 51       |
| 2. 17 | 32      | 21       |
| 2. 49 | 0. 78   | 52. 99   |
| 2. 36 | 2. 89   | 32       |

|       |         |         |
|-------|---------|---------|
| 2. 28 | 7. 86   | 221. 66 |
| 2. 56 | 3. 65   | 160. 56 |
| 2. 05 | 260. 9  | 121. 5  |
| 2. 31 | 3       | 23      |
| 2. 12 | 21      | 76      |
| 2. 46 | 3. 8    | 9. 73   |
| 2. 29 | 86. 44  | 48. 27  |
| 2. 33 | 3. 23   | 76      |
| 2. 06 | 3       | 7       |
| 1. 92 | 22      | 9       |
| 2. 38 | 2. 06   | 57. 8   |
| 2. 17 | 17      | 9       |
| 1. 69 | 148. 06 | 554. 18 |
| 2. 23 | 3. 76   | 9. 18   |
| 1. 84 | 2. 55   | 87. 21  |
| 2. 3  | 1       | 17      |
| 2. 26 | 3. 4    | 85. 13  |
| 2. 21 | 5       | 105     |
| 2. 4  | 105     | 33. 35  |
| 2. 2  | 3. 04   | 93. 21  |
| 2. 34 | 32      | 32      |
| 2     | 1. 69   | 11. 15  |
| 2. 22 | 496     | 117     |
| 2. 19 | 9. 58   | 27. 15  |
| 2. 7  | 23      | 8       |
| 2. 32 | 9. 47   | 45. 77  |
| 2. 13 | 2. 2    | 45. 14  |
| 2. 39 | 70. 62  | 15. 35  |
| 2. 07 | 6       | 98      |
| 2. 33 | 6       | 105     |
| 2. 2  | 8       | 107     |
| 2. 12 | 0. 5    | 6. 37   |
| 2. 01 | 106     | 56. 57  |
| 2. 07 | 6. 43   | 32      |
| 2. 36 | 12. 39  | 68      |
| 1. 82 | 1       | 32      |
| 2. 14 | 24      | 43      |
| 2. 11 | 1000    | 252     |
| 1. 98 | 22. 67  | 60. 76  |
| 2. 27 | 39. 09  | 6       |
| 2. 4  | 7. 28   | 73. 73  |
| 2. 06 | 12      | 55      |
| 2. 2  | 12      | 7       |
| 2. 04 | 112. 4  | 5. 33   |
| 2. 51 | 9. 77   | 6. 94   |
| 2. 03 | 315. 9  | 304     |

| (U/mL) | CA - 199 (U/mL) |       | CYFRA 21 - 1 (ng/mL) |       | NSE ( |
|--------|-----------------|-------|----------------------|-------|-------|
| NLM    | LM              | NLM   | LM                   | NLM   | LM    |
| 8      | 9.1             | 3     | 2.78                 | 5.02  | 19.49 |
| 21     | 32              | 14    | 2.31                 | 2.23  | 149.2 |
| 7.48   | 806.1           | 13    | 43.91                | 2.43  | 69.26 |
| 32     | 61              | 241.8 | 4.16                 | 36.06 | 12.4  |
| 9      | 14              | 21    | 21.44                | 12.25 | 13.4  |
| 6.33   | 14              | 6     | 1.57                 | 1.02  | 6     |
| 9      | 22.05           | 31    | 1.56                 | 1.42  | 9.43  |
| 8      | 579.5           | 13    | 10.15                | 4.5   | 25.86 |
| 21     | 32              | 21    | 23.12                | 2.13  | 16.32 |
| 11     | 13.22           | 21    | 1.54                 | 5.82  | 121.5 |
| 9      | 12              | 24    | 2.43                 | 2.27  | 22.53 |
| 162.4  | 292             | 18.79 | 3.44                 | 2.1   | 18.8  |
| 21     | 6.74            | 40.06 | 8.03                 | 5.89  | 24.72 |
| 8.89   | 21              | 12    | 10.22                | 1.23  | 9     |
| 83.22  | 12              | 48.39 | 24.76                | 2.56  | 22.06 |
| 361    | 1835            | 511.1 | 1.6                  | 2.72  | 16.47 |
| 8      | 5.9             | 3     | 3.43                 | 5.81  | 37.07 |
| 21     | 22              | 15    | 4.51                 | 23.43 | 23.63 |
| 170.3  | 714.3           | 4.54  | 3.84                 | 5.77  | 24.55 |
| 5      | 7.08            | 3     | 9.89                 | 16.04 | 370   |
| 11     | 43.52           | 32    | 25                   | 2.43  | 23.4  |
| 6      | 53.94           | 7     | 67.4                 | 2.91  | 17    |
| 11     | 21              | 4.89  | 5.81                 | 3.42  | 14.87 |
| 5.28   | 12.3            | 5.28  | 9.58                 | 1.32  | 165.8 |
| 9      | 246.2           | 12    | 1.48                 | 5.62  | 22.02 |
| 12     | 12              | 3     | 3.73                 | 3.44  | 12    |
| 21     | 6.69            | 21    | 1.32                 | 2.01  | 12.32 |
| 139.7  | 23              | 21    | 9.5                  | 5.89  | 11.33 |
| 11     | 21              | 4.63  | 3.21                 | 42.78 | 23.2  |
| 43     | 3               | 11    | 12.23                | 2.43  | 21    |
| 12     | 54              | 3     | 8.45                 | 1.32  | 27.19 |
| 15.23  | 180.6           | 2.17  | 4.8                  | 9.21  | 43    |
| 33     | 11              | 3.76  | 2.66                 | 7.21  | 116.1 |
| 11     | 255             | 4     | 32.4                 | 2.49  | 54    |
| 12     | 107.1           | 11    | 1.54                 | 3.83  | 370   |
| 21     | 13              | 11.74 | 4.53                 | 6.29  | 3.21  |
| 12     | 10              | 21    | 10.22                | 5.53  | 14.87 |
| 8      | 9               | 32    | 3.83                 | 23.31 | 87.39 |
| 21     | 3               | 8     | 3.24                 | 2.84  | 118   |
| 21     | 20.6            | 22    | 0.9                  | 8.45  | 16.77 |
| 23     | 1               | 9     | 4.22                 | 12.25 | 18.8  |
| 21     | 3               | 62.01 | 4.2                  | 2.31  | 13    |
| 76.67  | 574             | 21.99 | 16.04                | 2.32  | 39.16 |
| 4      | 16.18           | 14.11 | 3.83                 | 14.6  | 11.44 |
| 9      | 117             | 18    | 2.01                 | 1.25  | 20.46 |
| 5.65   | 4.04            | 8.04  | 3.41                 | 2.71  | 8.99  |
| 21     | 3               | 167.4 | 1.3                  | 6.03  | 48.29 |
| 14.17  | 574             | 7.34  | 2.43                 | 5.64  | 10.93 |
| 11     | 8               | 21    | 2.1                  | 3.19  | 22.06 |



|        |       |       |       |       |       |
|--------|-------|-------|-------|-------|-------|
| 11.87  | 12    | 7.11  | 18.95 | 2.52  | 14.96 |
| 12.36  | 32    | 13    | 2.84  | 2.05  | 32.13 |
| 9      | 175.3 | 11    | 256.2 | 6.27  | 18.6  |
| 77.89  | 263   | 7     | 3.43  | 1.21  | 12.18 |
| 21.99  | 44    | 4.51  | 3.45  | 4.53  | 10.63 |
| 7.67   | 359   | 6.07  | 2.49  | 2.13  | 17.37 |
| 24.29  | 12    | 82.96 | 2.43  | 20.04 | 16.76 |
| 6      | 46    | 32    | 4.32  | 34.56 | 5     |
| 6.26   | 21    | 21    | 5.64  | 5.17  | 21    |
| 2      | 3     | 3     | 4.5   | 10.7  | 21.32 |
| 11     | 12    | 3     | 8.96  | 5.24  | 23.85 |
| 14     | 32    | 119   | 4.53  | 1.4   | 32    |
| 9      | 72.51 | 33    | 32.54 | 32.1  | 151.1 |
| 8      | 4     | 51    | 7.54  | 8.45  | 12.62 |
| 21     | 41.22 | 21    | 32.24 | 234.2 | 50.07 |
| 4.01   | 21.34 | 12.22 | 8.66  | 4.8   | 19    |
| 236.04 | 4     | 13.53 | 5.64  | 34.5  | 12    |
| 21     | 6.83  | 12    | 30.31 | 10.93 | 18.96 |
| 21     | 11.96 | 135   | 1.32  | 6.54  | 23.1  |
| 8      | 14.45 | 3.39  | 1.32  | 9.48  | 13.39 |
| 9      | 11    | 21    | 13.57 | 41.53 | 13.42 |
| 3      | 7.98  | 3     | 1.45  | 4.22  | 370   |
| 32     | 12.16 | 32    | 11.19 | 14.55 | 114   |
| 59.81  | 11    | 11.29 | 2.91  | 47    | 21    |
| 9      | 3     | 34    | 2.32  | 1.34  | 370   |
| 14.21  | 1     | 6.33  | 4.17  | 2.89  | 8.14  |
| 0.95   | 574.2 | 10.6  | 2.14  | 4.65  | 32.12 |
| 11.1   | 3     | 22.32 | 23.1  | 5.42  | 23.6  |
| 16.16  | 22    | 20.54 | 77.69 | 3.11  | 370   |
| 21     | 281.6 | 15.59 | 43.2  | 1.83  | 34    |
| 11     | 20.21 | 21    | 5.45  | 3.99  | 20.61 |
| 9      | 35.96 | 12.6  | 7.62  | 4.16  | 32.33 |
| 11     | 1.56  | 12    | 13.22 | 9.37  | 15.06 |
| 11.66  | 39    | 12    | 6.27  | 3.24  | 32.1  |
| 8      | 87.9  | 11    | 3.8   | 1.54  | 16.95 |
| 21     | 6     | 32    | 92.34 | 1.24  | 11    |
| 45.57  | 39.3  | 44    | 3.11  | 5.64  | 37.21 |
| 11     | 10.88 | 12    | 2.86  | 1.4   | 12.42 |
| 21     | 11    | 21    | 2.43  | 15.54 | 14    |
| 11     | 601   | 7     | 4.29  | 3.73  | 14    |
| 9.8    | 12    | 12    | 4.2   | 3.42  | 9.57  |
| 7.21   | 32    | 9     | 5.85  | 6.27  | 13.59 |
| 12     | 54    | 11    | 234.2 | 4.22  | 16.3  |
| 10.33  | 1.42  | 5.64  | 12.39 | 2.96  | 237.3 |
| 21     | 5.3   | 21    | 3.21  | 4.53  | 56.44 |
| 17.89  | 3     | 11    | 1.21  | 2.43  | 43    |
| 219.5  | 21    | 1708  | 1.91  | 19.64 | 31    |
| 13.4   | 23.1  | 4.72  | 3.58  | 67.8  | 43    |
| 26.6   | 21    | 5.2   | 3.83  | 6.75  | 3.24  |
| 16.72  | 13    | 13.45 | 2.25  | 13.21 | 10.09 |
| 2      | 25.8  | 3     | 7.05  | 2.23  | 49.87 |

|       |       |       |       |       |       |
|-------|-------|-------|-------|-------|-------|
| 8     | 48.58 | 43    | 10.56 | 6.71  | 41.73 |
| 11    | 662.7 | 10.01 | 12.3  | 2.43  | 152.7 |
| 32    | 23    | 3     | 2.95  | 3.21  | 6.4   |
| 4     | 32.1  | 12    | 1.32  | 1.24  | 9.01  |
| 12    | 6.51  | 33    | 53.85 | 24.76 | 63.9  |
| 14.71 | 356   | 21    | 3.45  | 3.21  | 12    |
| 2     | 4.37  | 4.25  | 2.91  | 4.54  | 23.5  |
| 54    | 12    | 11    | 24.76 | 7.43  | 15.09 |
| 11    | 15.84 | 0.16  | 27.16 | 4.5   | 370   |
| 9     | 6.71  | 4.98  | 357.2 | 3.42  | 70.53 |
| 36    | 32    | 5.46  | 5.26  | 3.18  | 21.17 |
| 9     | 15    | 14    | 21.27 | 5.81  | 16.76 |
| 32    | 6.74  | 12.07 | 4.22  | 5.22  | 14.14 |
| 2     | 30.92 | 12.32 | 4.38  | 3.09  | 96.48 |
| 12.69 | 74    | 32    | 7.64  | 5.24  | 8.14  |
| 13    | 3     | 119   | 23.54 | 2.19  | 27.18 |
| 8.98  | 32    | 13    | 83.22 | 2.96  | 149.9 |
| 32    | 5.31  | 3     | 5.91  | 3.27  | 26.39 |
| 21    | 46.79 | 11    | 4.32  | 2.1   | 41    |
| 11    | 5.9   | 3     | 6.43  | 2.64  | 32    |
| 11    | 12.45 | 12    | 3.42  | 3.24  | 10.68 |
| 9     | 8.87  | 3     | 4.53  | 2.49  | 10.43 |
| 21    | 32    | 29.35 | 2.96  | 39.79 | 24.55 |
| 69.03 | 63.82 | 6.42  | 3.53  | 2.31  | 12    |
| 2     | 11    | 9     | 1.21  | 6.27  | 2.41  |
| 8     | 436   | 9.4   | 24.83 | 4.45  | 121.6 |
| 12    | 2     | 30.03 | 4.5   | 2.86  | 37.07 |
| 21    | 3     | 43    | 1.21  | 4.52  | 11.22 |
| 11    | 12.36 | 11    | 5.14  | 2.43  | 22    |
| 2     | 7.85  | 3.47  | 2.01  | 4.45  | 21.43 |
| 9     | 11    | 12    | 10.22 | 35.65 | 34.81 |
| 11    | 3.68  | 43    | 51.16 | 23.31 | 38.71 |
| 21    | 16.48 | 49    | 11.29 | 5.06  | 370   |
| 21    | 16    | 3     | 4.45  | 6.54  | 14    |
| 3     | 433.1 | 45.48 | 75.21 | 8.03  | 46.91 |
| 26.62 | 54    | 15.87 | 3.43  | 3.68  | 12.18 |
| 180.1 | 12    | 8.9   | 4.22  | 32.3  | 121.6 |
| 33    | 3     | 21    | 23.43 | 4.5   | 18.24 |
| 78    | 1205  | 17    | 45.6  | 4.53  | 21.6  |
| 0.63  | 12.55 | 21    | 4.53  | 6.43  | 17.07 |
| 95.12 | 7.82  | 24.6  | 3.38  | 8.53  | 80.12 |
| 21    | 12    | 7.71  | 6.54  | 1.9   | 8.79  |
| 7.16  | 704.1 | 43    | 100.7 | 1.21  | 62.6  |
| 78.67 | 8     | 51    | 4.16  | 1.33  | 29.59 |
| 32    | 125.3 | 7     | 45    | 5.42  | 18.9  |
| 8     | 3     | 120   | 2.64  | 3.45  | 32    |
| 6.26  | 9206  | 12    | 6.43  | 5.81  | 18.94 |
| 6.69  | 172   | 83    | 1.21  | 8.03  | 6.4   |
| 2     | 6.18  | 20    | 7.83  | 8.48  | 15.33 |
| 221   | 21    | 48.44 | 4.37  | 500   | 14.57 |
| 9     | 706   | 9     | 5.81  | 4.76  | 21.4  |

|       |       |       |       |       |       |
|-------|-------|-------|-------|-------|-------|
| 4     | 23    | 32    | 5.43  | 3.42  | 8.14  |
| 4     | 17.43 | 11    | 1.01  | 3.83  | 23.5  |
| 1.9   | 52.37 | 1.9   | 2.82  | 2.68  | 31.43 |
| 40.22 | 41    | 6.1   | 9.37  | 3.44  | 12    |
| 2     | 2.04  | 5.03  | 4.66  | 1.21  | 26.6  |
| 20.73 | 3     | 9.55  | 1.32  | 3.54  | 12.32 |
| 21    | 422.2 | 3     | 4.8   | 23.31 | 14.51 |
| 21    | 266.8 | 32    | 15    | 2.34  | 230.6 |
| 32    | 26    | 33    | 3.43  | 3.43  | 32.1  |
| 12    | 4     | 170   | 1.6   | 3.43  | 21.21 |
| 170.3 | 9     | 8     | 2.84  | 2.32  | 43    |
| 8.31  | 12    | 12    | 1.4   | 3.84  | 10.93 |
| 9     | 21    | 67    | 19.43 | 16.04 | 3.21  |
| 2     | 29.4  | 12    | 24.88 | 342.1 | 19.67 |
| 8.19  | 4     | 134.8 | 1.34  | 2.43  | 184.7 |
| 15    | 9     | 21    | 5.24  | 3.47  | 14    |
| 14    | 32    | 15    | 17.53 | 34.51 | 30.98 |
| 7     | 12    | 103   | 1.48  | 2.01  | 13.59 |
| 9     | 12    | 6     | 2.84  | 4.16  | 18.34 |
| 11    | 76    | 15    | 4.29  | 1.71  | 121.5 |
| 11    | 11    | 11    | 1.45  | 6.45  | 2.41  |
| 21    |       | 64.66 |       | 2.32  |       |
| 14    |       | 21    |       | 24.41 |       |
| 13    |       | 54.2  |       | 7.69  |       |
| 8     |       | 9.58  |       | 2.1   |       |
| 38.48 |       | 37.16 |       | 3.05  |       |
| 5.87  |       | 5.97  |       | 1.48  |       |
| 11.29 |       | 0.3   |       | 4.5   |       |
| 14    |       | 2.5   |       | 4.19  |       |
| 8     |       | 32    |       | 11.32 |       |
| 9     |       | 14    |       | 1.32  |       |
| 8     |       | 6.42  |       | 2.43  |       |
| 9     |       | 12    |       | 3.83  |       |
| 43.59 |       | 1.9   |       | 4.5   |       |
| 8     |       | 3     |       | 1.87  |       |
| 57.88 |       | 28.64 |       | 2.68  |       |
| 14.53 |       | 56.3  |       | 65.3  |       |
| 4     |       | 3     |       | 7.89  |       |
| 21    |       | 23    |       | 1.34  |       |
| 22    |       | 42    |       | 3.23  |       |
| 14.21 |       | 3     |       | 2.91  |       |
| 13.23 |       | 25    |       | 1.24  |       |
| 11    |       | 9     |       | 54.24 |       |
| 9.06  |       | 21    |       | 2.32  |       |
| 11.18 |       | 322   |       | 1.54  |       |
| 34.91 |       | 21    |       | 7.64  |       |
| 21    |       | 21    |       | 2.86  |       |
| 11    |       | 7     |       | 32.1  |       |
| 32    |       | 4.37  |       | 2.1   |       |
| 14.92 |       | 14.92 |       | 15.54 |       |
| 8.06  |       | 8     |       | 3.43  |       |

|       |       |       |
|-------|-------|-------|
| 12    | 25.44 | 2.64  |
| 17.64 | 9.47  | 3.47  |
| 9     | 22    | 3.48  |
| 17.63 | 15.17 | 5.43  |
| 11    | 21.86 | 1.23  |
| 2     | 7.83  | 0.93  |
| 18.06 | 31.88 | 1.23  |
| 9     | 15.35 | 8.61  |
| 9     | 12    | 4.19  |
| 12    | 34.07 | 6.43  |
| 21    | 21    | 4.8   |
| 65.45 | 13    | 1.21  |
| 9     | 11    | 1.21  |
| 9     | 11    | 1.87  |
| 11    | 3.48  | 1.6   |
| 3.2   | 23    | 4.22  |
| 62.76 | 3     | 3.83  |
| 300   | 4.97  | 26.86 |
| 42.4  | 34.52 | 10.75 |
| 11.27 | 12.6  | 3.67  |
| 27.74 | 168.8 | 52    |
| 11    | 7.23  | 5.06  |
| 9     | 22.41 | 4.25  |
| 8.35  | 12.82 | 1.88  |
| 11    | 15.32 | 2.6   |
| 11    | 46.53 | 1.21  |
| 9     | 6     | 1.33  |
| 11    | 11    | 3.24  |
| 115   | 9     | 4.16  |
| 21    | 26    | 8.45  |
| 11    | 21    | 2.52  |
| 31    | 5.26  | 32.1  |
| 29    | 16    | 3.81  |
| 3     | 3     | 2.49  |
| 2     | 12    | 3.24  |
| 21    | 18.79 | 8.86  |
| 8     | 6.18  | 53.28 |
| 2     | 15    | 2.43  |
| 11    | 34.54 | 6.27  |
| 13.43 | 4     | 4.53  |
| 7     | 11    | 1.6   |
| 8     | 5     | 4.22  |
| 2     | 3     | 6.43  |
| 34.93 | 12.96 | 2.27  |
| 2     | 21    | 2.31  |
| 8     | 21    | 21.43 |
| 22.4  | 13    | 37.3  |
| 8     | 1.87  | 6.67  |
| 12    | 12.4  | 4.53  |
| 21    | 11    | 3.04  |
| 9     | 34    | 7.43  |

|       |       |       |
|-------|-------|-------|
| 32    | 21    | 24.76 |
| 11    | 5.63  | 4.57  |
| 7.02  | 21    | 2.1   |
| 11    | 8     | 7.11  |
| 21    | 29    | 0.67  |
| 8     | 12    | 12.25 |
| 9     | 21    | 35.65 |
| 11.73 | 12    | 8.96  |
| 21    | 12    | 5.89  |
| 9     | 11    | 16.04 |
| 3     | 7     | 3.27  |
| 9     | 18    | 7.64  |
| 12    | 14    | 2.86  |
| 12    | 16    | 4.29  |
| 2.31  | 6.29  | 3.24  |
| 9     | 7.26  | 2.13  |
| 21    | 32.27 | 23.06 |
| 25.11 | 39.43 | 18.05 |
| 89    | 11    | 4.22  |
| 7     | 5.79  | 1.32  |
| 67    | 11.94 | 4.22  |
| 18    | 12    | 2.13  |
| 51    | 1.21  | 1.32  |
| 3.3   | 5.47  | 1.32  |
| 12    | 33    | 1.54  |
| 35.33 | 10.78 | 65.3  |
| 3.32  | 8.54  | 1.55  |
| 4.54  | 5.47  | 19.21 |
| 30.83 | 8.62  | 1.53  |
| 8     | 12    | 41.32 |
| 21    | 41    | 5.27  |
| 9     | 21    | 4.58  |
| 11.18 | 32    | 3.66  |
| 21    | 21    | 3.54  |
| 8     | 10    | 5.42  |
| 12    | 41    | 2.32  |
| 103.7 | 23    | 1.21  |
| 13    | 49    | 1.33  |
| 33    | 3     | 0.67  |
| 9     | 7.98  | 3.22  |
| 8     | 12    | 35.65 |
| 9     | 8     | 1.3   |
| 6.35  | 8     | 1.71  |
| 21    | 51    | 24.76 |
| 21    | 21    | 3.24  |
| 9     | 13    | 1.3   |
| 117   | 16    | 8.48  |
| 21    | 11.6  | 16.04 |
| 76    | 8     | 45.66 |
| 14    | 21    | 3.43  |
| 20.59 | 68.36 | 5.26  |

|       |       |        |
|-------|-------|--------|
| 11    | 16.32 | 4.91   |
| 9     | 12.72 | 4.34   |
| 11    | 15    | 1.25   |
| 59.6  | 21    | 4.22   |
| 11.64 | 12    | 4.53   |
| 1.2   | 2     | 1.23   |
| 10.77 | 21.37 | 4.22   |
| 14.5  | 11    | 12.71  |
| 20.82 | 0.94  | 1.88   |
| 4     | 8.43  | 4.15   |
| 11    | 43    | 6.7    |
| 13.98 | 9.31  | 11.33  |
| 4.24  | 12.43 | 11.6   |
| 32    | 4.67  | 1.73   |
| 32    | 5.51  | 23.31  |
| 9     | 43    | 16.04  |
| 23    | 3     | 1.54   |
| 9     | 6.21  | 4.16   |
| 6.69  | 11.1  | 4.32   |
| 14    | 12    | 3.43   |
| 12    | 11    | 3.43   |
| 17.72 | 12    | 111.21 |
| 4     | 14    | 1.34   |
| 321   | 4     | 1.34   |
| 11    | 208   | 2.95   |
| 57.28 | 12    | 2.32   |
| 14.95 | 12    | 3.44   |
| 29.54 | 144.7 | 4.68   |
| 8     | 9     | 8.03   |
| 21    | 23    | 12.25  |
| 5     | 22    | 3.45   |
| 21.35 | 21    | 2.32   |
| 7.75  | 10    | 16.04  |
| 7     | 7.7   | 5.89   |
| 21    | 10.28 | 2.84   |
| 14.41 | 0.6   | 24.13  |
| 6     | 21    | 4.32   |
| 32    | 32    | 3.73   |
| 8.52  | 33.17 | 8.45   |
| 9     | 9.66  | 4.43   |
| 13.38 | 23    | 1.32   |
| 9     | 106.3 | 8.4    |
| 8     | 3     | 3.83   |
| 23.05 | 11.61 | 1.23   |
| 12    | 574   | 4.22   |
| 11.82 | 4.83  | 1.21   |
| 40.01 | 21    | 4.22   |
| 2     | 4     | 2.43   |
| 13    | 21    | 4.22   |
| 8     | 6.68  | 2.27   |
| 14.23 | 20.53 | 2.7    |

|       |       |       |
|-------|-------|-------|
| 24    | 14.36 | 4.53  |
| 8     | 5.8   | 3.79  |
| 12    | 11.3  | 4.42  |
| 16.62 | 18.75 | 4.3   |
| 28.71 | 20.91 | 6.54  |
| 11    | 12.1  | 2.59  |
| 8     | 34    | 23.2  |
| 11    | 14    | 6.63  |
| 21    | 12    | 21.32 |
| 11    | 13.43 | 1.71  |
| 11    | 12    | 1.32  |
| 8.27  | 7.09  | 1.91  |
| 11    | 34    | 5.43  |
| 21.2  | 6     | 5.64  |
| 32    | 12    | 5.42  |
| 9     | 8     | 1.43  |
| 22    | 30    | 1.21  |
| 21    | 24    | 4.64  |
| 12    | 3     | 256.2 |
| 21    | 88    | 2.32  |
| 8     | 13    | 5.85  |
| 9     | 6     | 3.24  |
| 65.57 | 21    | 1.48  |
| 9     | 9.45  | 10.37 |
| 13.72 | 852.8 | 3.27  |
| 23.54 | 12    | 3.45  |
| 1.54  | 18.38 | 15.33 |
| 21    | 11    | 2.64  |
| 9     | 14    | 2.43  |
| 13    | 15.72 | 3.67  |
| 2     | 2.96  | 8.31  |
| 4     | 4     | 1.21  |
| 9     | 12    | 4.53  |
| 12    | 12    | 3.42  |
| 32    | 53    | 7.54  |
| 11    | 8.39  | 4.32  |
| 9     | 77.14 | 1.21  |
| 24    | 12.48 | 2.1   |
| 39.21 | 10.2  | 5.63  |
| 12    | 4.32  | 12.12 |
| 4.86  | 30.6  | 3.21  |
| 21    | 3     | 12.31 |
| 24.92 | 7.64  | 1.43  |
| 7.73  | 21    | 43.23 |
| 11    | 12    | 4.32  |
| 8     | 3     | 2.32  |
| 23    | 197   | 44.4  |
| 9     | 17.37 | 2.43  |
| 8     | 13    | 5.32  |
| 4     | 158   | 2.43  |
| 51.78 | 16    | 4.64  |

|       |       |       |
|-------|-------|-------|
| 20.82 | 8     | 2.32  |
| 22    | 8     | 1.43  |
| 8     | 32    | 8.96  |
| 11    | 3     | 2.52  |
| 11    | 21    | 1.91  |
| 32    | 12    | 2.43  |
| 13    | 0.6   | 1.48  |
| 21    | 12    | 2.31  |
| 11    | 3     | 16.04 |
| 14    | 11    | 1.54  |
| 11    | 3     | 1.3   |
| 32    | 12    | 2.18  |
| 49.58 | 16.58 | 4.94  |
| 99    | 13.73 | 4.2   |
| 12    | 21    | 1.17  |
| 2.34  | 9     | 4.22  |
| 9     | 8.01  | 1.25  |
| 8     | 36.89 | 1.32  |
| 58    | 12    | 1.45  |
| 66.58 | 5.55  | 64.3  |
| 15.03 | 21    | 1.21  |
| 10.57 | 10.29 | 2.49  |
| 11    | 3.38  | 4.84  |
| 8.43  | 10.25 | 4.64  |
| 8     | 277.4 | 25.58 |
| 21    | 15.26 | 20.82 |
| 11    | 10.8  | 4.64  |
| 21    | 12    | 10.9  |
| 6.66  | 9.3   | 7.53  |
| 21    | 23    | 4.36  |
| 23    | 13    | 2.71  |
| 26.12 | 10.39 | 12.23 |
| 11    | 12    | 4.43  |
| 11    | 12    | 44.4  |
| 24.22 | 14    | 5.43  |
| 11    | 21    | 23.12 |
| 25.7  | 12    | 1.52  |
| 9     | 11    | 2.3   |
| 21    | 24    | 1.24  |
| 21    | 3     | 1.98  |
| 21    | 8     | 1.3   |
| 24.29 | 11    | 3.21  |
| 11    | 21    | 4.32  |
| 11    | 3     | 3.43  |
| 21    | 61    | 2.86  |
| 21    | 6     | 2.86  |
| 2     | 21    | 23.43 |
| 11    | 23    | 4.17  |
| 21    | 21    | 2.43  |
| 64    | 43    | 4.17  |
| 69    | 3     | 234.2 |



|       |        |       |
|-------|--------|-------|
| 14    | 9.79   | 2.86  |
| 40.06 | 32     | 4.94  |
| 21    | 23     | 6.43  |
| 3.21  | 6.86   | 5.89  |
| 21    | 3      | 8.9   |
| 9     | 7.87   | 3.31  |
| 8.79  | 8.47   | 2.95  |
| 25.18 | 21     | 2.09  |
| 22    | 17.74  | 3.02  |
| 9     | 6.75   | 2.94  |
| 8.62  | 2.99   | 2.5   |
| 16.36 | 18.66  | 2.38  |
| 26.81 | 9.23   | 2.91  |
| 39.28 | 3      | 1.23  |
| 11    | 3      | 1.45  |
| 20.33 | 6.61   | 3.42  |
| 9     | 41.25  | 4.53  |
| 126.7 | 5.98   | 4.22  |
| 7.36  | 22     | 3.83  |
| 29.48 | 6.58   | 2.27  |
| 21    | 10.6   | 4.63  |
| 128   | 4.56   | 36.6  |
| 8     | 32     | 3.43  |
| 7.02  | 4.79   | 2.56  |
| 21    | 21     | 1.95  |
| 11    | 4.53   | 3.42  |
| 25.56 | 25.05  | 14.42 |
| 5     | 54.68  | 68.18 |
| 9     | 4.6    | 1.85  |
| 10.55 | 0.77   | 1.85  |
| 21    | 32     | 0.85  |
| 8.43  | 21     | 10.18 |
| 11    | 9      | 5.64  |
| 11.72 | 3      | 2.18  |
| 13.98 | 44     | 5.89  |
| 21    | 6      | 2.1   |
| 9     | 5      | 2.01  |
| 9     | 11     | 8.03  |
| 23    | 9.73   | 4.29  |
| 38.67 | 24.81  | 1.54  |
| 7     | 11     | 3.48  |
| 32    | 32     | 2.96  |
| 31    | 16     | 23.54 |
| 9     | 70.59  | 4.22  |
| 4     | 37.88  | 6.43  |
| 9     | 19.64  | 4.22  |
| 21.99 | 18.4   | 4.22  |
| 51    | 3      | 1.25  |
| 2     | 598.44 | 3.83  |
| 9     | 3      | 1.32  |
| 23    | 11     | 6.43  |

|       |       |       |
|-------|-------|-------|
| 15    | 11    | 1.87  |
| 6.5   | 21    | 26.32 |
| 12    | 5.7   | 10.86 |
| 6.43  | 5.75  | 1.19  |
| 12    | 6.6   | 5.81  |
| 2     | 24.03 | 3.04  |
| 13    | 21    | 2.2   |
| 8     | 3     | 3.87  |
| 11    | 16.64 | 7.34  |
| 12    | 3.72  | 2.23  |
| 11    | 99.25 | 5.74  |
| 5     | 3     | 5.43  |
| 12    | 32    | 21.32 |
| 9     | 3.57  | 6.96  |
| 23    | 78.76 | 6.71  |
| 11    | 30.08 | 2.37  |
| 21    | 13.38 | 3.24  |
| 11    | 11    | 5.26  |
| 9     | 21    | 7.4   |
| 11    | 14    | 7.33  |
| 11.57 | 27    | 7.35  |
| 32.47 | 11    | 2.23  |
| 14.65 | 11    | 7.33  |
| 73.03 | 12    | 5.26  |
| 38.81 | 3     | 2.78  |
| 121   | 21    | 24.76 |
| 24.22 | 23    | 1.54  |
| 32    | 36    | 2.01  |
| 8     | 4     | 5.26  |
| 21    | 18    | 24.2  |
| 9     | 23    | 2.18  |
| 9.83  | 15.9  | 1.53  |
| 21    | 2.15  | 4.57  |
| 21    | 32    | 5.81  |
| 11    | 14    | 1.54  |
| 1.32  | 12    | 2.32  |
| 34    | 11    | 5.02  |
| 43.74 | 10.9  | 3.61  |
| 11    | 13.42 | 1.43  |
| 9     | 21    | 8.13  |
| 6.51  | 3.07  | 2.44  |
| 11.24 | 12    | 4.19  |
| 2     | 31    | 1.21  |
| 11    | 21    | 4.22  |
| 11    | 81.75 | 1.23  |
| 8     | 12    | 1.21  |
| 21    | 45.82 | 1.21  |
| 9     | 191   | 2.13  |
| 14.5  | 15.89 | 20.63 |
| 19.49 | 11.78 | 4.32  |
| 9.28  | 9.33  | 5.31  |

|       |       |        |
|-------|-------|--------|
| 23.88 | 13.36 | 2.68   |
| 31    | 11.37 | 18.19  |
| 12.2  | 50.86 | 1.3    |
| 66.41 | 21.3  | 61     |
| 29.84 | 3328  | 5.32   |
| 7.05  | 5.78  | 3.97   |
| 12    | 3     | 14.32  |
| 277.6 | 6.48  | 5.65   |
| 8     | 12    | 2      |
| 11    | 9.69  | 4.04   |
| 29.54 | 7     | 6.54   |
| 23    | 21    | 3.43   |
| 11    | 1.55  | 8.96   |
| 11    | 10    | 4.29   |
| 10.15 | 3     | 3.27   |
| 12.78 | 16.08 | 7.64   |
| 8     | 21    | 2.96   |
| 21    | 21    | 23.54  |
| 8     | 14    | 4.16   |
| 9     | 43    | 4.57   |
| 11    | 10.36 | 1.45   |
| 21    | 6.72  | 2.32   |
| 9     | 18.2  | 2.55   |
| 9     | 23    | 3.36   |
| 9     | 42    | 1.21   |
| 11    | 23.52 | 1.95   |
| 11    | 17.8  | 2.42   |
| 4.45  | 31.78 | 2.41   |
| 8     | 12    | 1.32   |
| 7.41  | 32    | 6.27   |
| 9     | 13    | 1.6    |
| 0.62  | 14    | 2.13   |
| 3     | 2.36  | 1.87   |
| 21    | 21    | 1.21   |
| 7.19  | 22.14 | 2.42   |
| 8     | 31.64 | 2.25   |
| 21    | 21    | 2.43   |
| 21    | 5.97  | 2.75   |
| 9     | 1.65  | 6.09   |
| 12    | 3     | 14.32  |
| 9     | 21    | 17.69  |
| 33.82 | 20.25 | 2.91   |
| 7.75  | 10.45 | 3.43   |
| 12    | 7     | 3.43   |
| 9     | 17    | 1.34   |
| 9     | 14    | 2.13   |
| 11    | 32    | 3.43   |
| 7.46  | 7     | 4.17   |
| 21    | 7     | 123.43 |
| 21    | 1     | 24.76  |
| 7.49  | 101   | 1.91   |

|        |       |       |
|--------|-------|-------|
| 9      | 264   | 24.2  |
| 9      | 8     | 2.86  |
| 21     | 3     | 3.44  |
| 11     | 624   | 4.16  |
| 21     | 12    | 2.23  |
| 50.84  | 2     | 3.79  |
| 114.3  | 1.91  | 3.47  |
| 21     | 22    | 2.91  |
| 26     | 9     | 5.06  |
| 21     | 8     | 4.01  |
| 12     | 11    | 4.32  |
| 21     | 9.92  | 4.57  |
| 9      | 21    | 3.07  |
| 2      | 18.45 | 3.24  |
| 5.48   | 7.26  | 17.68 |
| 17.67  | 13.52 | 8.95  |
| 4      | 11    | 1.32  |
| 2      | 7.27  | 4.53  |
| 8      | 21    | 2.43  |
| 8.61   | 7.89  | 4.8   |
| 8      | 9.71  | 1.21  |
| 2.3    | 3.1   | 1.21  |
| 180.13 | 2     | 4.22  |
| 45.6   | 28.64 | 79    |
| 65.57  | 50.4  | 7.82  |
| 23.4   | 13.4  | 10.8  |
| 3.11   | 8.57  | 3.09  |
| 14.38  | 3.36  | 2.07  |
| 32     | 4.54  | 3.54  |
| 0.62   | 61    | 7.54  |
| 12     | 7.93  | 7.54  |
| 46.09  | 9.26  | 2.65  |
| 21     | 12    | 2.97  |
| 12     | 329.8 | 1.88  |
| 12     | 3.11  | 10.77 |
| 42     | 27.13 | 2.64  |
| 0.95   | 12    | 10.18 |
| 32.1   | 235.6 | 5.83  |
| 21     | 8     | 1.21  |
| 20.73  | 32    | 3.43  |
| 11.33  | 7     | 1.24  |
| 66.41  | 32    | 3.52  |
| 8      | 12    | 1.33  |
| 16.18  | 1     | 2.23  |
| 21     | 11    | 5.06  |
| 32     | 11    | 4.57  |
| 9      | 54    | 3.45  |
| 9      | 33    | 5.81  |
| 25.7   | 13    | 5.06  |
| 89.81  | 21    | 1.21  |
| 32.87  | 21    | 5.81  |

|       |       |       |
|-------|-------|-------|
| 14.58 | 21    | 7.32  |
| 21    | 32    | 6.43  |
| 91.31 | 10.5  | 23.13 |
| 73    | 29    | 7.11  |
| 8     | 12    | 43.45 |
| 9     | 29.78 | 2.43  |
| 21    | 6.54  | 7.44  |
| 11    | 13.32 | 3.43  |
| 12    | 12    | 1.25  |
| 2     | 7     | 21.13 |
| 2.17  | 7.36  | 3.83  |
| 2.31  | 33    | 4.5   |
| 3     | 21    | 1.32  |
| 4.84  | 4.24  | 2.08  |
| 78.67 | 14.6  | 2.78  |
| 51.78 | 25.81 | 7.32  |
| 32    | 14.3  | 34.8  |
| 8     | 67.77 | 5.64  |
| 2     | 11.23 | 4.65  |
| 29.76 | 64.27 | 4.54  |
| 13    | 43    | 2.43  |
| 9     | 21    | 10.3  |
| 11    | 21    | 4.5   |
| 7     | 5.97  | 5.25  |
| 11    | 21    | 4.32  |
| 21    | 7.85  | 2.32  |
| 63.69 | 3.98  | 45.6  |
| 11    | 11    | 3.24  |
| 21.99 | 3     | 10.18 |
| 11    | 42    | 0.32  |
| 4     | 21    | 2.32  |
| 16.62 | 9     | 1.24  |
| 8     | 31    | 5.06  |
| 21.3  | 66    | 0.85  |
| 12    | 3     | 3.79  |
| 11    | 12    | 2.01  |
| 21    | 31    | 1.21  |
| 25.08 | 21    | 24.76 |
| 9     | 29.42 | 2.67  |
| 38    | 13    | 55.33 |
| 44    | 21    | 2.32  |
| 12    | 29    | 3.81  |
| 3     | 13    | 342.1 |
| 13    | 54    | 2.1   |
| 9     | 27.43 | 3.21  |
| 9     | 11    | 3.43  |
| 51    | 9.06  | 8.61  |
| 11    | 10.2  | 7.5   |
| 9     | 26.41 | 4.44  |
| 18.28 | 32    | 3.12  |
| 12    | 16.36 | 4.36  |

|       |       |       |
|-------|-------|-------|
| 13.95 | 25.5  | 3.67  |
| 13.95 | 13    | 4.8   |
| 21.99 | 15    | 6.43  |
| 11    | 11    | 1.21  |
| 2.1   | 11    | 4.22  |
| 23.45 | 32.4  | 32.4  |
| 11.58 | 9     | 4.32  |
| 2     | 14.8  | 4.66  |
| 31    | 0.81  | 3.54  |
| 11    | 14.82 | 25.88 |
| 12    | 32    | 6.13  |
| 8.31  | 6.34  | 32.32 |
| 21    | 3     | 7.43  |
| 26.83 | 11.89 | 26.43 |
| 21    | 12    | 2.71  |
| 32    | 22    | 3.43  |
| 8     | 7     | 1.24  |
| 4     | 21    | 1.21  |
| 35.6  | 27    | 1.33  |
| 31    | 9     | 1.98  |
| 30.83 | 574   | 5.42  |
| 9     | 88    | 8.15  |
| 23    | 22    | 5.26  |
| 15    | 13    | 1.4   |
| 21    | 30    | 2.96  |
| 12    | 26    | 4.01  |
| 72.97 | 27.76 | 2.13  |
| 26.82 | 228.2 | 19.71 |
| 8.5   | 3     | 2.31  |
| 9     | 12.42 | 1.31  |
| 11    | 21    | 1.03  |
| 21    | 11    | 1.23  |
| 19    | 2.21  | 3.83  |
| 2     | 15.83 | 2.27  |
| 2     | 5.3   | 3.62  |
| 30.91 | 10.93 | 1.77  |
| 54.3  | 6.53  | 3.43  |
| 4     | 7.51  | 8.74  |
| 16.3  | 1.71  | 8     |
| 59.42 | 523.5 | 4.74  |
| 46.88 | 156.9 | 25.82 |
| 3.43  | 6.57  | 6.29  |
| 22    | 5.6   | 2.01  |
| 12    | 13    | 6.04  |
| 9     | 9.48  | 57.43 |
| 9     | 32    | 5.68  |
| 11    | 54.15 | 11.16 |
| 10.57 | 186   | 4.32  |
| 9     | 6     | 2.32  |
| 29.84 | 21    | 2.32  |
| 14.42 | 5.93  | 10.28 |

|       |       |       |
|-------|-------|-------|
| 8     | 8.58  | 0.85  |
| 9     | 33    | 16.04 |
| 21    | 73    | 2.32  |
| 21    | 21    | 1.3   |
| 9.94  | 3     | 2.5   |
| 12    | 32    | 4.31  |
| 21.71 | 5.17  | 4.06  |
| 22    | 14.45 | 1.56  |
| 21    | 3.81  | 9.22  |
| 9     | 517.8 | 6.01  |
| 9     | 3     | 1.32  |
| 18.29 | 46.83 | 2.13  |
| 12    | 12    | 1.87  |
| 8     | 15.78 | 1.21  |
| 14.69 | 5.35  | 1.21  |
| 21    | 14    | 1.45  |
| 36.66 | 1.82  | 1.23  |
| 17.11 | 7.01  | 1.62  |
| 14.35 | 28.1  | 7.14  |
| 9     | 1.4   | 11.37 |
| 15.7  | 32    | 9.56  |
| 24.2  | 3     | 22.45 |
| 11.92 | 21.37 | 1.95  |
| 21    | 6.25  | 1.8   |
| 9     | 3     | 32.12 |
| 9     | 31.3  | 1.45  |
| 21    | 3     | 23.43 |
| 9     | 10.27 | 15.31 |
| 9     | 21    | 23.1  |
| 23    | 12    | 1.33  |
| 11    | 54    | 10.18 |
| 12    | 6     | 1.21  |
| 11.15 | 21    | 4.64  |
| 9     | 21    | 10.77 |
| 9     | 21    | 1.91  |
| 4     | 11    | 24.76 |
| 32    | 21    | 5.89  |
| 8     | 6     | 2.32  |
| 42.36 | 25.69 | 3.81  |
| 23    | 2.93  | 2.96  |
| 12    | 0.6   | 2.01  |
| 11    | 11    | 2.86  |
| 10.02 | 12.62 | 3.41  |
| 10.77 | 6.78  | 2.66  |
| 9.27  | 6.7   | 1.99  |
| 13.17 | 3     | 3.44  |
| 11.24 | 13.44 | 4.31  |
| 7.48  | 13.96 | 2.74  |
| 8.89  | 15.26 | 156.7 |
| 35.66 | 17.44 | 3.83  |
| 0.2   | 10    | 4.8   |

|               |       |       |
|---------------|-------|-------|
| 9             | 33    | 4.22  |
| 9             | 55.97 | 1.45  |
| 2             | 21    | 1.21  |
| 21            | 12    | 20.68 |
| 0.3           | 11    | 1.89  |
| 39.3          | 36.64 | 6.82  |
| 21            | 10.98 | 2.69  |
| 11            | 14    | 1.43  |
| 8             | 14.03 | 1.79  |
| 44.05         | 57.99 | 2.13  |
| 13            | 23    | 2.54  |
| 31            | 13.85 | 1.43  |
| 8             | 11    | 2.41  |
| 21            | 19.29 | 7.1   |
| 117           | 4.71  | 12.25 |
| 11            | 11    | 2.01  |
| 2             | 22    | 2.1   |
| 4             | 3.8   | 0.67  |
| 21            | 3     | 3.43  |
| 44.05         | 4     | 1.34  |
| 21            | 12    | 2.32  |
| 16.98         | 3     | 3.84  |
| 20.25         | 61    | 1.4   |
| 9             | 9     | 2.43  |
| 117           | 12    | 1.4   |
| 33.2          | 3     | 43.31 |
| 13            | 3     | 24.76 |
| 21            | 9     | 2.18  |
| 73            | 3     | 5.81  |
| 99            | 326   | 3.79  |
| 34            | 11    | 3.43  |
| 9             | 15    | 16.04 |
| 121           | 12    | 5.89  |
| 9             | 10.44 | 9.16  |
| <b>292.34</b> | 11    | 1.21  |
| 11.92         | 9.18  | 1.32  |
| 21            | 10.59 | 4.5   |
| 7             | 11    | 3.83  |
| 21.88         | 3     | 4.53  |
| 32            | 12.81 | 14.95 |
| 20.25         | 10.43 | 3.43  |
| 9.8           | 43.32 | 35.7  |
| 57.28         | 11.15 | 4.92  |
| 6.85          | 27.53 | 12.43 |
| 32            | 12    | 8.96  |
| 22            | 33.26 | 8.89  |
| 12.55         | 13    | 5.81  |
| 21            | 23.27 | 2.91  |
| 9             | 14.97 | 4.29  |
| 8             | 29.46 | 2.86  |
| 9             | 10.17 | 82.5  |



|       |       |       |
|-------|-------|-------|
| 11    | 3.01  | 9.37  |
| 9     | 7.83  | 2.88  |
| 9.34  | 97    | 3.43  |
| 21    | 93.21 | 1.3   |
| 6.46  | 21    | 1.48  |
| 23    | 11    | 2.64  |
| 5     | 11    | 1.71  |
| 6     | 22    | 1.21  |
| 9     | 3     | 2.1   |
| 15.3  | 18    | 1.48  |
| 21    | 60.87 | 2.64  |
| 22    | 50.57 | 9.97  |
| 31.5  | 12    | 4.24  |
| 8     | 98    | 2.18  |
| 9     | 21    | 24.76 |
| 8.43  | 3     | 4.29  |
| 8.67  | 8.41  | 2.23  |
| 59.51 | 25.24 | 147.2 |
| 9     | 3     | 23.06 |
| 22.78 | 12.06 | 2.17  |
| 2.5   | 13.66 | 8.89  |
| 21    | 60    | 8.31  |
| 2     | 9     | 1.23  |
| 2     | 1.44  | 22.34 |
| 9     | 12.78 | 2.43  |
| 1.35  | 3.8   | 4.8   |
| 8     | 12    | 3.83  |
| 12    | 5.32  | 1.21  |
| 20.28 | 2.43  | 1.45  |
| 4.69  | 4.69  | 1.87  |
| 9     | 9.82  | 2.2   |
| 1.36  | 11    | 1.2   |
| 12.1  | 18.29 | 4.22  |
| 161.8 | 12.6  | 4.92  |
| 21    | 17.99 | 15.58 |
| 11    | 3.42  | 2.32  |
| 8     | 1.98  | 38.29 |
| 33    | 30.51 | 23.11 |
| 21    | 23    | 14.43 |
| 21    | 3     | 4.01  |
| 14.26 | 32    | 2.96  |
| 11    | 29    | 1.24  |
| 11.92 | 145   | 3.81  |
| 11    | 32    | 16.04 |
| 10.32 | 8     | 23.54 |
| 21    | 574   | 1.4   |
| 11    | 5     | 1.48  |
| 222.2 | 12    | 3.43  |
| 89.81 | 21    | 8.15  |
| 32    | 44.16 | 3.21  |
| 21    | 166.5 | 3.81  |

|        |         |       |
|--------|---------|-------|
| 34.04  | 0.6     | 4.21  |
| 12     | 21      | 1.21  |
| 11     | 33      | 2.23  |
| 33     | 13      | 8.15  |
| 21     | 12      | 5.33  |
| 12     | 4.54    | 39.22 |
| 21     | 21      | 12.56 |
| 9      | 33      | 1.82  |
| 11     | 7.43    | 3.55  |
| 21     | 32.96   | 1.21  |
| 22     | 2       | 2.43  |
| 32     | 44.47   | 2.32  |
| 4      | 54      | 5.65  |
| 32.23  | 98.01   | 4.65  |
| 12     | 8.49    | 15.67 |
| 21     | 13      | 5.43  |
| 21     | 13      | 10.22 |
| 71.2   | 30      | 1.48  |
| 32     | 54      | 1.4   |
| 15.95  | 8.18    | 4.01  |
| 43     | 19.87   | 1.4   |
| 61.81  | 22      | 34.51 |
| 21     | 32      | 5.29  |
| 7.59   | 17.47   | 1.32  |
| 8.62   | 59.19   | 11.16 |
| 11     | 12      | 3.21  |
| 2      | 18.7    | 6.43  |
| 8      | 14      | 1.21  |
| 349.11 | 2460.09 | 1.32  |
| 11.09  | 25      | 152.5 |
| 45.57  | 61.52   | 4.73  |
| 43     | 13.73   | 2.77  |
| 58.73  | 14.23   | 10.38 |
| 32.49  | 4.32    | 44.43 |
| 7.78   | 12      | 4.17  |
| 21     | 12      | 3.81  |
| 21     | 32      | 3.79  |
| 2      | 11      | 1.24  |
| 21     | 12      | 2.64  |
| 2      | 43      | 4.32  |
| 11     | 21      | 1.54  |
| 23     | 9.54    | 3.43  |
| 4.22   | 71      | 4.32  |
| 8      | 15      | 2.32  |
| 14.45  | 3       | 5.73  |
| 12     | 9.81    | 8.92  |
| 4      | 3       | 1.2   |
| 9      | 5.26    | 1.23  |
| 26     | 3       | 1.87  |
| 2      | 29      | 6.43  |
| 1.6    | 14.31   | 4.22  |

|       |       |       |
|-------|-------|-------|
| 21    | 15.14 | 2.27  |
| 15.63 | 11    | 33    |
| 8     | 9.59  | 6.27  |
| 11.12 | 13.23 | 2.14  |
| 12    | 5.43  | 2.58  |
| 8     | 90.75 | 33.54 |
| 8.98  | 114.8 | 3.43  |
| 11.64 | 11.04 | 35.96 |
| 21    | 12    | 6.08  |
| 23    | 3.69  | 41.21 |
| 21    | 24    | 3.43  |
| 10.03 | 21    | 2.01  |
| 23    | 11    | 16.04 |
| 9.92  | 12    | 1.4   |
| 11    | 57    | 1.71  |
| 8     | 23.38 | 4.01  |
| 130.7 | 25.03 | 2.32  |
| 25    | 3     | 4.01  |
| 21    | 12    | 3.24  |
| 13    | 3     | 5.26  |
| 35.63 | 7.71  | 6.1   |
| 12    | 14.56 | 8.13  |
| 8.18  | 7.53  | 3.86  |
| 17    | 17    | 1.6   |
| 4.97  | 14    | 4.8   |
| 13    | 11    | 1.21  |
| 4.29  | 3     | 4.53  |
| 23    | 11    | 3.42  |
| 2     | 574   | 1.6   |
| 12    | 11    | 3.42  |
| 11    | 15.23 | 3.84  |
| 8     | 17.81 | 35.99 |
| 8     | 3     | 52.2  |
| 11    | 12    | 5.64  |
| 13    | 13    | 5.84  |
| 21.07 | 21    | 4.52  |
| 11    | 12    | 10.74 |
| 32    | 21    | 0.43  |
| 21    | 4.1   | 2.03  |
| 63.57 | 6.29  | 342.1 |
| 4.24  | 23    | 8.64  |
| 11.12 | 11    | 3.52  |
| 21    | 15    | 9.37  |
| 11    | 21    | 8.45  |
| 8.64  | 21    | 6.54  |
| 54.03 | 3     | 5.89  |
| 21    | 32    | 4.57  |
| 6.69  | 7     | 4.16  |
| 8     | 13    | 5.64  |
| 1.28  | 306   | 6.35  |
| 137   | 11    | 9.97  |

|       |       |       |
|-------|-------|-------|
| 6     | 143   | 5.33  |
| 43    | 23    | 2.1   |
| 31    | 3     | 48.46 |
| 8     | 38.52 | 23.41 |
| 1     | 33    | 3.83  |
| 2     | 5.87  | 4.5   |
| 21    | 2.18  | 2.04  |
| 12    | 12.59 | 4.53  |
| 12    | 14    | 2.6   |
| 11    | 21    | 4.34  |
| 12    | 21    | 5.83  |
| 22    | 8     | 1.43  |
| 9     | 12    | 3.43  |
| 9     | 32    | 1.98  |
| 8.27  | 43    | 5.83  |
| 10.83 | 18    | 2.78  |
| 9     | 11    | 23.31 |
| 21    | 28.43 | 3.45  |
| 13    | 52.68 | 5.26  |
| 87    | 3     | 2.52  |
| 33    | 1.34  | 4.16  |
| 9     | 18.28 | 81.24 |
| 32    | 270   | 4.01  |
| 32    | 4.22  | 100.6 |
| 33    | 7     | 1.78  |
| 18    | 10    | 1.21  |
| 32    | 26.07 | 36.54 |
| 10.83 | 22.96 | 3.89  |
| 32    | 7.1   | 5.85  |
| 11    | 4.53  | 5.19  |
| 2     | 12.1  | 4.13  |
| 13.23 | 11.48 | 27.61 |
| 6     | 197.6 | 17.69 |
| 14.71 | 16.78 | 3.73  |
| 2     | 16.08 | 8.48  |
| 5.65  | 3     | 2.1   |
| 11    | 21    | 4.54  |
| 11.66 | 19.26 | 1.3   |
| 10.55 | 39    | 3.21  |
| 11    | 12    | 5.85  |
| 9     | 12    | 4.57  |
| 13.11 | 21    | 7.35  |
| 8     | 3     | 3.21  |
| 13    | 26.65 | 5.81  |
| 1.77  | 21    | 5.33  |
| 9     | 3     | 3.45  |
| 11    | 7.18  | 23.43 |
| 2.3   | 7.91  | 7.99  |
| 5.02  | 67.45 | 2.31  |
| 8     | 11    | 1.23  |
| 9     | 21    | 3.42  |

|       |       |       |
|-------|-------|-------|
| 9     | 10.94 | 1.45  |
| 63.23 | 11.45 | 6.43  |
| 7     | 31    | 4.5   |
| 7.36  | 7.36  | 4.8   |
| 12.35 | 121.9 | 1.23  |
| 4.86  | 20.39 | 1.24  |
| 22    | 6.46  | 48.46 |
| 11.33 | 12.93 | 3.43  |
| 8.94  | 9.64  | 1.69  |
| 9     | 31    | 1.51  |
| 13.11 | 12    | 2.82  |
| 12    | 8     | 3.27  |
| 11    | 12    | 10.22 |
| 11    | 31    | 7.35  |
| 87.24 | 3     | 24.76 |
| 9     | 0.6   | 3.45  |
| 11    | 6.18  | 2.01  |
| 9     | 11    | 2.1   |
| 9     | 13.69 | 3.83  |
| 8     | 11    | 1.32  |
| 31    | 9.61  | 27.23 |
| 11.82 | 407.7 | 86.5  |
| 12.98 | 9.89  | 1.09  |
| 7.54  | 6.44  | 3.12  |
| 4     | 23.21 | 2.32  |
| 6     | 4.72  | 2.64  |
| 21.35 | 6.14  | 234.2 |
| 21.07 | 21    | 4.16  |
| 9     | 62    | 2.91  |
| 7.41  | 12    | 1.21  |
| 21    | 91    | 2.32  |
| 14    | 9     | 3.21  |
| 12    | 31    | 1.87  |
| 8     | 6.3   | 1.23  |
| 4     | 8.78  | 2.21  |
| 12    | 10.91 | 5.18  |
| 11    | 23.04 | 37.63 |
| 4     | 3     | 1.21  |
| 9     | 37.88 | 8.96  |
| 3.11  | 14    | 5.24  |
| 11    | 21    | 4.17  |
| 21    | 9     | 3.27  |
| 11    | 11    | 3.24  |
| 3     | 3     | 4.66  |
| 16.02 | 17.17 | 1.87  |
| 7     | 12    | 6.43  |
| 2.32  | 40.6  | 1.45  |
| 21    | 3     | 342.1 |
| 23.27 | 21    | 2.01  |
| 9.39  | 8.87  | 28.46 |
| 14    | 15    | 1.25  |

|       |       |       |
|-------|-------|-------|
| 11    | 6.16  | 3.43  |
| 13.09 | 112.3 | 1.32  |
| 9     | 35.06 | 1.32  |
| 2     | 11    | 1.16  |
| 24.49 | 27.41 | 7.48  |
| 9     | 21    | 36.08 |
| 33.88 | 10.02 | 3.81  |
| 11    | 12    | 4.63  |
| 22    | 3     | 2.55  |
| 55.86 | 29.29 | 36.82 |
| 7     | 6.58  | 2.31  |
| 7.41  | 9.12  | 5.17  |
| 2.33  | 35.52 | 28.61 |
| 1     | 21.29 | 1.32  |
| 8.86  | 9.97  | 34.2  |
| 11    | 21    | 4.53  |
| 19.38 | 21    | 3.81  |
| 11    | 21    | 3.84  |
| 9     | 32    | 2.32  |
| 8     | 10    | 2.01  |
| 2     | 21    | 5.81  |
| 22    | 4     | 10.77 |
| 65    | 18632 | 4.22  |
| 11    | 12    | 16.04 |
| 14    | 11.42 | 3.37  |
| 99    | 12    | 1.32  |
| 23    | 13    | 10.18 |
| 14.95 | 4.65  | 40.13 |
| 12.78 | 11    | 23.43 |
| 43    | 7.58  | 23.42 |
| 23.27 | 10.62 | 4.32  |
| 12    | 21    | 4.8   |
| 4     | 6.6   | 2.31  |
| 11    | 31    | 1.23  |
| 11    | 24    | 5.89  |
| 2     | 11    | 2.01  |
| 17.83 | 5.17  | 16.04 |
| 21    | 21.05 | 1.32  |
| 21    | 11    | 2.27  |
| 2.1   | 11    | 1.32  |
| 9     | 12    | 2.32  |
| 11    | 23    | 1.21  |
| 27.83 | 69.03 | 1.43  |
| 32.1  | 6.8   | 2.17  |
| 4.78  | 12.46 | 6.2   |
| 12    | 12    | 3.43  |
| 7.05  | 4     | 234.2 |
| 9     | 9     | 1.24  |
| 64    | 7     | 3.81  |
| 81    | 12    | 35.65 |
| 2     | 14.78 | 1.34  |

|       |       |        |
|-------|-------|--------|
| 11    | 21    | 1.25   |
| 21    | 15.03 | 1.45   |
| 12    | 147   | 6.43   |
| 321   | 3     | 11.73  |
| 21    | 34    | 1.24   |
| 12.31 | 33    | 5.81   |
| 10.46 | 4.23  | 3.47   |
| 121.8 | 21    | 6.43   |
| 4     | 3     | 4.19   |
| 13    | 83    | 3.43   |
| 11    | 21    | 7.54   |
| 21    | 16    | 4.16   |
| 11    | 13    | 3.45   |
| 21    | 6     | 0.85   |
| 9.94  | 11    | 2.32   |
| 43    | 122   | 14.24  |
| 2     | 3     | 1.45   |
| 9     | 32    | 5.43   |
| 8     | 3     | 342.1  |
| 9     | 20.35 | 1.7    |
| 11    | 6.44  | 27.75  |
| 8     | 10.6  | 1.93   |
| 76.88 | 5125  | 5.13   |
| 31    | 13    | 1.43   |
| 21    | 21    | 342.1  |
| 2     | 12    | 342.1  |
| 11.28 | 11    | 2.27   |
| 11    | 1.3   | 3.53   |
| 5.48  | 22    | 2.32   |
| 9     | 29    | 2.01   |
| 9     | 12    | 35.65  |
| 2     | 24    | 8.45   |
| 20.62 | 160.8 | 1.48   |
| 86.14 | 2.69  | 4.5    |
| 59.65 | 11    | 8.45   |
| 21    | 13    | 4.16   |
| 11    | 8     | 4.57   |
| 11    | 11    | 3.73   |
| 75.34 | 8.43  | 12.99  |
| 33.5  | 4.6   | 4.85   |
| 6.67  | 25    | 6.43   |
| 2     | 9     | 31.21  |
| 12    | 10.21 | 0.81   |
| 7.4   | 31.48 | 32.1   |
| 103.7 | 834.9 | 5.43   |
| 20.07 | 19.1  | 5.64   |
| 23    | 10.74 | 52.93  |
| 38.81 | 14    | 14.54  |
| 21    | 12    | 7.76   |
| 31    | 32    | 123.43 |
| 4.84  | 5     | 0.32   |

|       |       |        |
|-------|-------|--------|
| 11    | 8     | 2.32   |
| 32    | 32    | 4.16   |
| 9     | 12    | 7.64   |
| 53.05 | 12    | 3.79   |
| 11    | 141   | 3.21   |
| 10.81 | 249   | 2.1    |
| 9     | 31    | 3.81   |
| 4     | 3     | 1.32   |
| 55.48 | 545.5 | 53.4   |
| 11    | 12    | 12.42  |
| 53.05 | 100   | 16.06  |
| 23.02 | 16.04 | 16.42  |
| 9     | 5.66  | 4.33   |
| 11.1  | 12    | 5.53   |
| 11    | 8     | 7.33   |
| 21    | 3     | 4.01   |
| 11    | 3     | 2.91   |
| 25.67 | 10.3  | 2.18   |
| 12    | 0.6   | 1.4    |
| 12    | 23.15 | 8.45   |
| 15.95 | 12    | 6.45   |
| 23    | 7.8   | 2.22   |
| 86.37 | 11.52 | 31.15  |
| 23.52 | 6168  | 4.33   |
| 2     | 11    | 1.21   |
| 16    | 21    | 3.42   |
| 31    | 3.21  | 4.53   |
| 1.91  | 11    | 1.21   |
| 15.28 | 52.6  | 10.15  |
| 61.25 | 12.43 | 65.3   |
| 6.46  | 14    | 32.4   |
| 7.76  | 18.8  | 3.21   |
| 5     | 12    | 67.3   |
| 13    | 3     | 3.73   |
| 32.23 | 17    | 3.24   |
| 20.07 | 2     | 1.21   |
| 32    | 5     | 1.3    |
| 12    | 28.86 | 6.43   |
| 12    | 24.42 | 2.72   |
| 10    | 13    | 3.83   |
| 31    | 12    | 2.13   |
| 20.67 | 7.22  | 4.53   |
| 37.43 | 26.37 | 2.02   |
| 11    | 5.64  | 1.99   |
| 4.87  | 41    | 32.2   |
| 11    | 12    | 3.31   |
| 12    | 10.11 | 23.84  |
| 3.21  | 12    | 3.24   |
| 4     | 701   | 4.22   |
| 6     | 1     | 123.43 |
| 104.2 | 14.32 | 5.65   |



|       |       |        |
|-------|-------|--------|
| 13    | 6.43  | 3.42   |
| 13.95 | 12    | 1.43   |
| 21    | 21    | 2.96   |
| 9.85  | 32    | 3.21   |
| 32    | 25.91 | 24.76  |
| 9     | 13.22 | 8.45   |
| 21    | 22.2  | 4.16   |
| 19    | 21    | 4.32   |
| 2     | 11    | 1.83   |
| 11.49 | 28.08 | 3.65   |
| 43    | 3     | 4.5    |
| 15.53 | 11.2  | 1.78   |
| 6.71  | 9.51  | 3.83   |
| 9     | 11    | 1.23   |
| 73.73 | 8.61  | 1.32   |
| 11.58 | 12    | 9.86   |
| 9     | 1.76  | 1.93   |
| 31    | 17.27 | 6.32   |
| 10.32 | 53.82 | 13.32  |
| 73.03 | 5.48  | 12.31  |
| 81.56 | 34.86 | 7.33   |
| 21    | 12    | 1.54   |
| 9     | 20    | 5.81   |
| 7     | 21    | 3.81   |
| 9     | 21    | 23.43  |
| 4     | 18    | 2.32   |
| 2     | 12    | 2.43   |
| 22    | 3     | 1.6    |
| 7     | 12    | 1.21   |
| 8.34  | 8.15  | 2.14   |
| 35.6  | 236.1 | 3.44   |
| 11.72 | 5.24  | 21.43  |
| 32.47 | 34.71 | 32.4   |
| 71.2  | 198   | 12.48  |
| 32    | 12.9  | 6.54   |
| 21    | 21    | 35.65  |
| 3.43  | 61    | 7.54   |
| 8     | 15    | 1.33   |
| 16.56 | 14.92 | 223.43 |
| 11    | 29    | 2.43   |
| 9     | 7     | 8.45   |
| 31    | 10    | 5.26   |
| 13    | 12    | 2.32   |
| 19.86 | 24.17 | 4.21   |
| 9     | 3     | 1.23   |
| 9.06  | 344.4 | 16.12  |
| 9     | 12    | 12.43  |
| 54.03 | 661.9 | 16.04  |
| 2     | 41.15 | 23.54  |
| 24.92 | 3     | 5.06   |
| 21    | 11    | 4.29   |

|       |       |        |
|-------|-------|--------|
| 11    | 3     | 12.25  |
| 9     | 3     | 2.49   |
| 11    | 48    | 5.89   |
| 8     | 17.19 | 3.51   |
| 21    | 12.44 | 3.48   |
| 2     | 27.03 | 1.23   |
| 12    | 12.22 | 1.21   |
| 7     | 10.52 | 4.14   |
| 12    | 3     | 56.2   |
| 23    | 228.6 | 1.48   |
| 6.43  | 54    | 1.3    |
| 32    | 3     | 123.43 |
| 26.81 | 21    | 3.44   |
| 4     | 3     | 2.91   |
| 19.47 | 30.66 | 2.32   |
| 10.1  | 3     | 5.81   |
| 21    | 3     | 1.3    |
| 22    | 22    | 2.64   |
| 21    | 32    | 3.43   |
| 11    | 3.56  | 3.43   |
| 13.64 | 13.48 | 1.54   |
| 9     | 9.05  | 2.32   |
| 12    | 21.42 | 1.56   |
| 14.69 | 11.96 | 4.4    |
| 21    | 22    | 1.32   |
| 8     | 15    | 4.8    |
| 24.29 | 14.6  | 4.56   |
| 13    | 115.5 | 9.01   |
| 12    | 1.54  | 5.75   |
| 16.98 | 21    | 1.21   |
| 21    | 3     | 1.3    |
| 99    | 43.92 | 34.21  |
| 13.01 | 8.59  | 13.51  |
| 26.28 | 9.24  | 2.45   |
| 11    | 11    | 4.5    |
| 60.85 | 26    | 1.32   |
| 22    | 2     | 4.8    |
| 8     | 1.54  | 13.45  |
| 21    | 3     | 15.37  |
| 32    | 10.91 | 1.4    |
| 12.79 | 10.48 | 4.64   |
| 161.8 | 22    | 2.32   |
| 8     | 12    | 8.48   |
| 12    | 8     | 5.89   |
| 8     | 75    | 23.54  |
| 11    | 11    | 2.91   |
| 98.79 | 5.5   | 2.23   |
| 13    | 22.4  | 4.29   |
| 43    | 50.66 | 2.32   |
| 3     | 13    | 4.01   |
| 103   | 12    | 4.29   |

|        |        |        |
|--------|--------|--------|
| 21     | 21     | 2. 23  |
| 11     | 33     | 3. 1   |
| 8      | 22     | 1. 29  |
| 12     | 19. 52 | 4. 62  |
| 163. 1 | 11     | 6. 11  |
| 9      | 27. 23 | 4. 8   |
| 9      | 34     | 12. 4  |
| 7. 46  | 17. 3  | 1. 26  |
| 21     | 12     | 2. 36  |
| 21     | 3      | 4. 32  |
| 8. 19  | 30. 45 | 65. 3  |
| 11     | 15. 89 | 3. 27  |
| 31     | 21     | 1. 43  |
| 11     | 181    | 3. 21  |
| 2. 31  | 7. 34  | 39. 98 |
| 16. 97 | 245    | 5. 01  |
| 14     | 11     | 2. 01  |
| 16. 02 | 3      | 3. 42  |
| 11     | 6. 94  | 4. 94  |
| 8. 45  | 8. 51  | 43. 21 |
| 9      | 14     | 3. 23  |
| 95. 12 | 41     | 3. 43  |
| 4. 63  | 8      | 1. 43  |
| 136    | 12     | 6. 27  |
| 30. 01 | 32. 52 | 8. 54  |
| 9      | 19     | 4. 19  |
| 8      | 47. 43 | 4. 53  |
| 9      | 2      | 4. 53  |
| 21     | 29. 21 | 1. 23  |
| 8. 64  | 14     | 4. 78  |
| 21     | 3. 87  | 25. 73 |
| 200. 2 | 76. 42 | 1. 23  |
| 9      | 21     | 4. 57  |
| 9      | 6      | 16. 04 |
| 9      | 31     | 3. 83  |
| 16     | 21     | 8. 61  |
| 135    | 21     | 2. 13  |
| 3      | 3      | 2. 27  |
| 8      | 1. 34  | 5. 32  |
| 11     | 13     | 24. 42 |
| 9      | 21     | 11. 56 |
| 83. 22 | 85. 91 | 5. 42  |
| 9      | 602. 2 | 23. 54 |
| 21     | 13. 77 | 23. 43 |
| 14     | 19     | 9. 34  |
| 21     | 27. 15 | 2. 63  |
| 19. 4  | 26. 32 | 8. 54  |
| 5. 58  | 4. 47  | 26. 92 |
| 2      | 2. 35  | 1. 81  |
| 9. 11  | 13. 99 | 5. 32  |
| 21     | 26. 59 | 1. 91  |

|       |        |       |
|-------|--------|-------|
| 8     | 66     | 3.54  |
| 9     | 12     | 2.32  |
| 22.84 | 18.43  | 7.35  |
| 7.94  | 11     | 3.45  |
| 23.88 | 53     | 2.95  |
| 41    | 9      | 10.18 |
| 11.27 | 21     | 4.54  |
| 7.13  | 11     | 8.03  |
| 6.29  | 6.6    | 4.57  |
| 9     | 3      | 1.54  |
| 2.34  | 11     | 4.8   |
| 65.3  | 12.78  | 34.95 |
| 3.43  | 351.58 | 4.22  |
| 7.16  | 15.13  | 2.35  |
| 4     | 21.61  | 3.75  |
| 21    | 14     | 4.21  |
| 12    | 12     | 32.1  |
| 21    | 14.6   | 4.26  |
| 21    | 3      | 2.23  |
| 14.41 | 15.66  | 6.27  |
| 9     | 31     | 1.43  |
| 18.42 | 11.45  | 17.54 |
| 11    | 17.41  | 42.19 |
| 11    | 2.14   | 3.73  |
| 22    | 56     | 5.24  |
| 26.83 | 19     | 3.27  |
| 8.45  | 12     | 5.64  |
| 9     | 5      | 4.32  |
| 9     | 46.08  | 3.17  |
| 77.2  | 3.46   | 20.47 |
| 11    | 660.7  | 1.23  |
| 10    | 12     | 2.27  |
| 9     | 34.54  | 2.27  |
| 4     | 3.31   | 10.64 |
| 12    | 9      | 1.21  |
| 200.2 | 10     | 23.43 |
| 65    | 471    | 2.64  |
| 14.54 | 16.31  | 6.27  |
| 32    | 65     | 342.1 |
| 22.64 | 8.84   | 39.98 |
| 4     | 33     | 2.13  |
| 36.67 | 10.66  | 2.43  |
| 21    | 21     | 2.78  |
| 11    | 12     | 3.45  |
| 23    | 12     | 2.43  |
| 90    | 6      | 1.54  |
| 11.43 | 3      | 1.87  |
| 8     | 3      | 4.8   |
| 87.3  | 12.14  | 2.32  |
| 24.29 | 21.12  | 2.89  |
| 4.95  | 9.52   | 1.32  |

|        |       |       |
|--------|-------|-------|
| 105    | 20.79 | 4.53  |
| 11     | 8.51  | 2.35  |
| 27.43  | 21.06 | 5.25  |
| 8      | 32    | 2.08  |
| 8.04   | 21    | 3.73  |
| 8      | 32    | 1.43  |
| 9      | 32    | 2.32  |
| 9      | 14    | 7.64  |
| 23     | 11    | 2.91  |
| 3.17   | 7     | 2.32  |
| 117    | 14    | 2.78  |
| 7.92   | 26.87 | 17.83 |
| 9      | 5.51  | 7.76  |
| 9      | 1.81  | 2.7   |
| 4      | 23.91 | 6.27  |
| 4      | 2.5   | 3.83  |
| 2      | 22.13 | 2.36  |
| 19.49  | 22    | 4.64  |
| 17.89  | 12    | 10.77 |
| 43     | 0.6   | 2.49  |
| 26.48  | 21    | 2.32  |
| 11     | 269   | 2.32  |
| 21     | 3     | 7.54  |
| 32     | 8.86  | 4.87  |
| 21     | 3.84  | 13.3  |
| 32     | 3.9   | 1.02  |
| 4      | 12    | 3.43  |
| 8      | 11    | 3.43  |
| 25.56  | 73    | 3.43  |
| 89.81  | 12    | 2.1   |
| 16     | 59.61 | 3.43  |
| 4.22   | 22.87 | 34.51 |
| 9      | 3     | 2.23  |
| 9      | 11    | 1.6   |
| 8      | 11    | 2.27  |
| 72     | 39    | 1.23  |
| 13.25  | 18.2  | 4.22  |
| 54     | 3.82  | 7.64  |
| 9      | 6.08  | 5.68  |
| 21     | 41    | 1.01  |
| 32     | 3     | 10.74 |
| 21     | 267   | 5.81  |
| 15.71  | 6     | 2.32  |
| 12     | 8.67  | 1.32  |
| 222.2  | 139.6 | 2.65  |
| 144.72 | 256.4 | 42.1  |
| 40.71  | 43    | 2.18  |
| 9      | 23    | 23.43 |
| 11     | 23    | 2.49  |
| 17.4   | 6.45  | 4.31  |
| 21     | 1.23  | 6.32  |

|       |         |       |
|-------|---------|-------|
| 21    | 574     | 2.13  |
| 37.87 | 1088.68 | 6.43  |
| 121   | 60.52   | 7.16  |
| 21    | 3       | 23.54 |
| 2     | 11      | 4.16  |
| 10.41 | 7.27    | 1.72  |
| 9     | 3.52    | 9.87  |
| 9.8   | 21      | 11.23 |
| 21    | 21      | 4.22  |
| 9     | 12      | 1.32  |
| 18.04 | 22.54   | 3.48  |
| 3     | 76      | 1.32  |
| 9.86  | 13      | 1.32  |
| 21    | 12.48   | 3.84  |
| 9     | 23.64   | 5.81  |
| 13.74 | 22      | 3.45  |
| 30.81 | 2.39    | 2.01  |
| 35    | 34      | 23.31 |
| 80    | 11      | 2.27  |
| 58.73 | 117.4   | 4.23  |
| 21    | 12      | 2.32  |
| 4.59  | 12.19   | 6.43  |
| 89.81 | 12      | 123.4 |
| 5.75  | 46.5    | 2.65  |
| 9     | 7       | 1.21  |
| 21    | 27.52   | 2.41  |
| 2     | 665.34  | 3.42  |
| 5.43  | 16.45   | 7.11  |
| 9     | 11      | 4.29  |
| 7     | 251     | 13.43 |
| 110   | 9       | 24.76 |
| 8.53  | 12.16   | 1.7   |
| 29.09 | 15.61   | 6.43  |
| 7     | 12      | 67.86 |
| 9     | 8.47    | 8.03  |
| 9     | 24      | 3.81  |
| 7.75  | 12      | 256.2 |
| 115   | 237.7   | 3.21  |
| 22.81 | 14.52   | 3.81  |
| 12.64 | 11.24   | 1.95  |
| 14    | 54.25   | 4     |
| 21    | 3       | 23.31 |
| 9     | 12      | 4.32  |
| 6.33  | 8.5     | 39.84 |
| 39.88 | 9.59    | 6.82  |
| 41.43 | 12      | 446.2 |

| $\mu$ g/L) | TPSA (ng/L) |      |
|------------|-------------|------|
|            | LM          | NLM  |
| 18.8       | 0.87        | 5.6  |
| 15         | 1.22        | 1.32 |
| 23.25      | 2.42        | 0.34 |
| 57.89      | 0.26        | 0.86 |
| 12         | 0.25        | 0.26 |
| 6          | 1.2         | 0.15 |
| 10.29      | 0.97        | 0.87 |
| 22.5       | 2.12        | 1.54 |
| 17.25      | 1.32        | 1.2  |
| 8.34       | 1.54        | 1.87 |
| 39.16      | 1.43        | 0.87 |
| 24.38      | 1.98        | 1.22 |
| 14.59      | 0.86        | 0.39 |
| 21         | 0.7         | 2.32 |
| 38.05      | 1.43        | 0.37 |
| 14.49      | 1.53        | 0.54 |
| 14.87      | 5.3         | 76   |
| 10.69      | 0.85        | 1.54 |
| 21.83      | 0.54        | 6.3  |
| 16.77      | 2.54        | 0.87 |
| 12.09      | 7.8         | 0.87 |
| 6.36       | 5.64        | 0.66 |
| 13.59      | 0.87        | 1.06 |
| 370        | 3.21        | 5.3  |
| 4.3        | 0.34        | 1.53 |
| 14.41      | 1.3         | 7.4  |
| 9          | 2.42        | 1.98 |
| 23.5       | 0.86        | 1.98 |
| 41.06      | 1.34        | 1.64 |
| 12.33      | 1.3         | 0.98 |
| 11.36      | 0.97        | 0.54 |
| 11.03      | 0.98        | 0.87 |
| 26.01      | 0.96        | 1    |
| 16.06      | 1.87        | 0.46 |
| 23.1       | 1.32        | 2.7  |
| 13.81      | 1.75        | 1.3  |
| 18         | 1.3         | 2.56 |
| 21.17      | 1.17        | 0.98 |
| 2.41       | 0.79        | 0.87 |
| 9.01       | 2.26        | 1.43 |
| 12.93      | 1.43        | 1.34 |
| 21.05      | 0.76        | 1.47 |
| 11.02      | 0.26        | 0.87 |
| 32.38      | 0.97        | 0.89 |
| 17         | 0.26        | 2.32 |
| 13.51      | 1.2         | 0.78 |
| 12.26      | 0.65        | 2.32 |
| 12         | 0.66        | 0.53 |
| 17.3       | 3.2         | 1.3  |

|       |      |      |
|-------|------|------|
| 184.7 | 0.65 | 5.6  |
| 24.13 | 1.54 | 1.14 |
| 10.13 | 2.7  | 1.53 |
| 3.21  | 2.32 | 1.54 |
| 14.46 | 1.98 | 0.98 |
| 58.2  | 0.21 | 6.3  |
| 23.85 | 0.56 | 0.48 |
| 21    | 1.43 | 1.3  |
| 14.7  | 0.9  | 0.76 |
| 16.03 | 0.89 | 0.54 |
| 14    | 0.46 | 0.54 |
| 16.47 | 0.99 | 0.86 |
| 17.07 | 0.64 | 1.98 |
| 43    | 0.43 | 1.54 |
| 6.36  | 1.23 | 1.98 |
| 23.46 | 0.12 | 0.98 |
| 22    | 1.3  | 2.32 |
| 27.55 | 2.32 | 1.2  |
| 78    | 0.98 | 1.06 |
| 25.76 | 1.2  | 1.25 |
| 14.41 | 1.26 | 1.3  |
| 21.83 | 0.58 | 0.87 |
| 25.71 | 1.32 | 1.45 |
| 34    | 0.97 | 2.54 |
| 21.2  | 1.65 | 1.43 |
| 32.02 | 5.3  | 1.3  |
| 10.87 | 0.93 | 3.5  |
| 18.4  | 1.32 | 0.98 |
| 23    | 0.76 | 3.4  |
| 8.14  | 3.5  | 0.96 |
| 19.2  | 1.21 | 1.21 |
| 31.08 | 2.43 | 0.98 |
| 14    | 0.23 | 1.53 |
| 14.01 | 2.12 | 1.2  |
| 21    | 1.54 | 1.76 |
| 9     | 0.65 | 1.23 |
| 14    | 1.26 | 1.98 |
| 16.87 | 1.23 | 0.54 |
| 21.53 | 0.97 | 1.54 |
| 12.4  | 1.98 | 1.54 |
| 15.74 | 1.54 | 0.76 |
| 78    | 0.99 | 0.66 |
| 11.42 | 2.31 | 0.87 |
| 30.89 | 0.54 | 0.09 |
| 32.22 | 1.35 | 0.54 |
| 12    | 1.76 | 0.9  |
| 27.79 | 1.98 | 7.4  |
| 17.8  | 0.94 | 5.3  |
| 20.83 | 1.53 | 0.34 |
| 12    | 2.42 | 1.3  |
| 17.07 | 0.98 | 1.54 |



|       |      |      |
|-------|------|------|
| 12.27 | 1.67 | 1.75 |
| 12.35 | 0.41 | 1.4  |
| 12    | 0.33 | 1.98 |
| 51.64 | 0.54 | 0.87 |
| 18.24 | 1.03 | 0.97 |
| 38.44 | 1.32 | 1.34 |
| 68.27 | 0.78 | 0.68 |
| 2.1   | 0.86 | 1.43 |
| 6.55  | 7.4  | 1.54 |
| 20.95 | 0.65 | 1.45 |
| 13.15 | 1.86 | 3.56 |
| 11.64 | 1.2  | 0.54 |
| 257.1 | 0.98 | 0.43 |
| 10.58 | 0.65 | 0.94 |
| 32    | 1.98 | 0.54 |
| 10.92 | 1.43 | 0.79 |
| 15.18 | 1.32 | 2.99 |
| 21    | 0.76 | 0.26 |
| 19.65 | 1    | 1.54 |
| 18    | 1.98 | 1.23 |
| 10.7  | 7.8  | 1.65 |
| 13.53 | 7.4  | 0.76 |
| 47.67 | 1.22 | 0.87 |
| 22.29 | 5.3  | 2.08 |
| 32.85 | 0.97 | 1.2  |
| 205.7 | 1.75 | 0.4  |
| 105.4 | 7.4  | 1.03 |
| 32    | 2.99 | 0.23 |
| 8     | 0.21 | 0.26 |
| 11.07 | 0.54 | 1.54 |
| 16.76 | 0.87 | 0.34 |
| 3.21  | 0.23 | 1.32 |
| 27.94 | 7.15 | 1.56 |
| 21    | 0.78 | 0.99 |
| 23.1  | 5.67 | 1.76 |
| 12.81 | 1.3  | 1.01 |
| 43    | 0.79 | 3.54 |
| 11.64 | 0.46 | 1.54 |
| 16.77 | 7.4  | 1.4  |
| 12    | 1.76 | 0.46 |
| 16.87 | 3.83 | 1.45 |
| 11.59 | 1.76 | 0.85 |
| 14    | 0.57 | 1.53 |
| 12    | 1.98 | 2.1  |
| 6.4   | 5.6  | 5.5  |
| 32    | 1.43 | 1.98 |
| 25.63 | 1.2  | 1.54 |
| 21.63 | 0.87 | 0.54 |
| 21    | 0.87 | 0.22 |
| 96.74 | 1.3  | 2.32 |
| 9.47  | 2.32 | 1.67 |

|       |      |      |
|-------|------|------|
| 16.47 | 1.65 | 0.98 |
| 12.8  | 12.3 | 0.99 |
| 15.05 | 1.36 | 0.35 |
| 22.8  | 0.43 | 0.09 |
| 49.88 | 0.18 | 1.23 |
| 14    | 2.1  | 5.3  |
| 2.34  | 1.76 | 0.86 |
| 9.07  | 5.56 | 2.1  |
| 15    | 1.54 | 1.06 |
| 9     | 0.87 | 0.87 |
| 19.65 | 0.99 | 1.76 |
| 16.87 | 1.54 | 0.56 |
| 21    | 0.54 | 1.57 |
| 23.1  | 2.3  | 1.87 |
| 12.43 | 2.99 | 1.34 |
| 32.67 | 1.3  | 2.1  |
| 11.64 | 0.71 | 0.33 |
| 23    | 0.86 | 0.7  |
| 6.55  | 1.54 | 0.86 |
| 14.87 | 0.43 | 1.54 |
| 15.8  | 0.56 | 1.65 |
| 26.68 |      | 0.69 |
| 18.22 |      | 1.87 |
| 41.51 |      | 1.67 |
| 25.07 |      | 2.32 |
| 18.51 |      | 1.32 |
| 22.76 |      | 1.23 |
| 4.88  |      | 0.39 |
| 32    |      | 0.86 |
| 22.6  |      | 0.34 |
| 20.95 |      | 0.61 |
| 17.29 |      | 0.26 |
| 23.6  |      | 1.98 |
| 8.79  |      | 0.26 |
| 32.32 |      | 0.99 |
| 20.38 |      | 2.08 |
| 15.22 |      | 2.4  |
| 145.5 |      | 0.35 |
| 9     |      | 1.2  |
| 11.7  |      | 2.1  |
| 52    |      | 0.12 |
| 12    |      | 1.3  |
| 184.7 |      | 0.45 |
| 12.18 |      | 0.26 |
| 22.65 |      | 1.54 |
| 21.17 |      | 0.54 |
| 9     |      | 1.56 |
| 13.4  |      | 1.23 |
| 11.23 |      | 0.76 |
| 22.56 |      | 1.3  |
| 15.6  |      | 1.75 |

|       |      |
|-------|------|
| 12.58 | 1.23 |
| 12.33 | 0.67 |
| 13.36 | 0.65 |
| 52.57 | 0.98 |
| 32.12 | 0.31 |
| 53.01 | 1.24 |
| 110   | 1.43 |
| 21    | 0.97 |
| 5.64  | 5.6  |
| 29.59 | 0.72 |
| 21    | 1.68 |
| 8.79  | 1.2  |
| 17.29 | 5.6  |
| 14    | 0.54 |
| 23    | 0.54 |
| 39.16 | 1.34 |
| 14.14 | 0.87 |
| 73.9  | 0.36 |
| 16.3  | 3.56 |
| 9.63  | 2.24 |
| 17.79 | 5.32 |
| 34.96 | 0.26 |
| 24    | 1    |
| 9.32  | 1.3  |
| 12.55 | 1.53 |
| 16    | 1.53 |
| 34.96 | 0.87 |
| 14    | 1.06 |
| 184.7 | 0.54 |
| 39.16 | 1.87 |
| 1.32  | 1.65 |
| 23.17 | 0.59 |
| 15.65 | 1.3  |
| 41    | 0.87 |
| 70.46 | 1.98 |
| 46.55 | 1.43 |
| 27.16 | 1.32 |
| 21    | 0.9  |
| 12    | 0.54 |
| 8.14  | 1.22 |
| 16.76 | 1.3  |
| 8.14  | 1.4  |
| 23.1  | 0.97 |
| 11.42 | 2.32 |
| 39.16 | 0.54 |
| 22.6  | 0.99 |
| 32    | 5.3  |
| 41.88 | 0.34 |
| 12.82 | 7.4  |
| 12    | 2.7  |
| 12    | 6.3  |

|       |      |
|-------|------|
| 40.59 | 0.61 |
| 15.18 | 0.99 |
| 12.68 | 2.32 |
| 9     | 1.53 |
| 23.72 | 0.26 |
| 49.87 | 1.78 |
| 48.29 | 0.87 |
| 32.1  | 1.54 |
| 15.82 | 2.31 |
| 21    | 7.8  |
| 32    | 0.9  |
| 10.63 | 0.86 |
| 23.1  | 2.99 |
| 4.53  | 0.54 |
| 123   | 1.76 |
| 101.4 | 0.65 |
| 46.74 | 1.54 |
| 39.37 | 1.23 |
| 23.2  | 0.99 |
| 19.23 | 0.98 |
| 22    | 0.54 |
| 31    | 2.32 |
| 2.43  | 3.2  |
| 32.22 | 2.99 |
| 13    | 0.87 |
| 32    | 2.76 |
| 11.76 | 3.56 |
| 10.66 | 0.87 |
| 12    | 1.54 |
| 22.65 | 1.86 |
| 191.5 | 2.43 |
| 9.01  | 1.32 |
| 21.94 | 0.5  |
| 15    | 5.6  |
| 11.76 | 0.66 |
| 17.37 | 0.99 |
| 15.52 | 0.61 |
| 11    | 1.68 |
| 18    | 1.76 |
| 12.9  | 0.52 |
| 370   | 1.32 |
| 12    | 1.75 |
| 15.6  | 0.54 |
| 15.5  | 1.3  |
| 14    | 1.98 |
| 10.69 | 1.34 |
| 370   | 3.3  |
| 28.34 | 2.12 |
| 31.15 | 0.97 |
| 13.39 | 0.98 |
| 58.35 | 0.41 |

|       |      |
|-------|------|
| 9.37  | 1.98 |
| 18.3  | 1.23 |
| 6.55  | 1.4  |
| 12.8  | 2.31 |
| 21.32 | 2.7  |
| 21    | 6.3  |
| 21    | 0.99 |
| 13.39 | 2.31 |
| 9.56  | 0.73 |
| 11.82 | 0.34 |
| 10.63 | 1.75 |
| 14.4  | 0.87 |
| 13.53 | 0.75 |
| 9.22  | 1.75 |
| 14    | 0.87 |
| 18.11 | 0.98 |
| 23    | 0.54 |
| 7.7   | 0.87 |
| 13    | 0.54 |
| 5.5   | 1.3  |
| 18.34 | 0.87 |
| 14    | 0.46 |
| 14.95 | 0.86 |
| 15.52 | 0.46 |
| 7.95  | 0.54 |
| 31    | 1.54 |
| 12    | 1.98 |
| 42.3  | 0.33 |
| 32    | 1.23 |
| 23.6  | 1.54 |
| 16.76 | 0.26 |
| 17.46 | 0.34 |
| 12    | 1.28 |
| 26.17 | 2.12 |
| 16.6  | 1.43 |
| 13.62 | 1.98 |
| 107.6 | 0.97 |
| 10.69 | 2.99 |
| 21.57 | 1.43 |
| 370   | 1.58 |
| 21.1  | 0.28 |
| 17.8  | 1.34 |
| 10.67 | 2.42 |
| 27.5  | 1.4  |
| 4     | 0.26 |
| 22.53 | 0.54 |
| 23.43 | 0.72 |
| 19.01 | 0.87 |
| 18.24 | 1.54 |
| 17    | 1.56 |
| 28.44 | 0.89 |

|       |       |
|-------|-------|
| 145.5 | 0.34  |
| 11.76 | 0.99  |
| 11.66 | 3.5   |
| 107.6 | 3.5   |
| 16.87 | 0.32  |
| 12    | 1.23  |
| 6.36  | 1.32  |
| 43.61 | 0.97  |
| 12    | 1.75  |
| 20.79 | 0.46  |
| 14    | 1.43  |
| 60.13 | 1.35  |
| 14.41 | 0.26  |
| 12    | 2.31  |
| 12    | 1.98  |
| 15.52 | 0.7   |
| 9     | 0.26  |
| 15.82 | 1.06  |
| 107.6 | 1.23  |
| 12    | 0.87  |
| 39.16 | 0.56  |
| 6.55  | 0.98  |
| 17    | 1.65  |
| 15.35 | 1.78  |
| 15.13 | 0.54  |
| 23.4  | 0.54  |
| 15.98 | 1.19  |
| 16.77 | 1.3   |
| 8.79  | 1.98  |
| 25.4  | 0.87  |
| 14.98 | 0.98  |
| 14.87 | 1.2   |
| 48.29 | 7.4   |
| 21.17 | 7.4   |
| 11.22 | 0.46  |
| 13.99 | 1.65  |
| 21.16 | 0.53  |
| 21.4  | 0.41  |
| 22    | 1.16  |
| 22    | 2.7   |
| 17    | 1.65  |
| 13.17 | 2.26  |
| 17.4  | 1.53  |
| 11.51 | 1.2   |
| 21    | 0.87  |
| 15    | 1.2   |
| 14    | 1.22  |
| 21.2  | 0.79  |
| 14    | 1.76  |
| 12.62 | 3.2   |
| 14    | 0.786 |

|       |       |
|-------|-------|
| 52    | 0.87  |
| 13.93 | 0.66  |
| 102.2 | 1.43  |
| 23.1  | 0.26  |
| 9     | 0.99  |
| 12    | 1.34  |
| 11.9  | 1.45  |
| 14    | 0.45  |
| 12    | 5.5   |
| 29.59 | 0.87  |
| 12    | 5.3   |
| 15    | 2.99  |
| 24.99 | 0.87  |
| 34.11 | 0.65  |
| 60.12 | 0.67  |
| 23.85 | 2.1   |
| 1.32  | 2.56  |
| 23.85 | 1.54  |
| 27.19 | 0.87  |
| 37.5  | 6.94  |
| 66.77 | 1.3   |
| 13.36 | 0.35  |
| 58.57 | 3.21  |
| 6.74  | 1.86  |
| 22.12 | 1.54  |
| 9.82  | 0.5   |
| 10.93 | 4.6   |
| 19    | 0.7   |
| 43    | 7.4   |
| 22.06 | 7.8   |
| 12.85 | 1.65  |
| 21    | 1.75  |
| 12    | 2.12  |
| 16.12 | 1.54  |
| 27.68 | 0.97  |
| 21    | 0.99  |
| 13.57 | 1.54  |
| 11    | 0.43  |
| 32    | 3.2   |
| 17.37 | 1.98  |
| 15.52 | 7.4   |
| 25.35 | 1.53  |
| 4.53  | 0.7   |
| 10.7  | 0.26  |
| 34.96 | 1.23  |
| 34.96 | 1.98  |
| 21    | 1.65  |
| 41    | 0.54  |
| 16.76 | 1.967 |
| 28.57 | 1.43  |
| 30.89 | 0.54  |

|       |       |
|-------|-------|
| 23.38 | 0.89  |
| 19.52 | 0.34  |
| 12    | 0.786 |
| 20.64 | 1.24  |
| 17.42 | 0.87  |
| 11    | 1.25  |
| 20.96 | 0.87  |
| 7.67  | 0.93  |
| 9.9   | 0.41  |
| 3.96  | 1.23  |
| 13.4  | 0.84  |
| 7.15  | 2.12  |
| 12.68 | 1.06  |
| 271.9 | 1.2   |
| 39.16 | 6.3   |
| 21.83 | 0.66  |
| 11.36 | 1.45  |
| 9.12  | 0.97  |
| 121.6 | 0.98  |
| 32    | 0.61  |
| 17.44 | 1.78  |
| 15.8  | 2.7   |
| 17.07 | 1.06  |
| 72.96 | 0.43  |
| 8.59  | 0.75  |
| 43    | 3.21  |
| 21.2  | 0.48  |
| 22.5  | 1.2   |
| 10.5  | 0.97  |
| 14    | 3.2   |
| 31    | 0.54  |
| 11    | 0.9   |
| 18.34 | 1.43  |
| 14    | 1.75  |
| 20.46 | 1.53  |
| 78    | 0.72  |
| 14.87 | 1.76  |
| 12.93 | 0.26  |
| 20.14 | 1.98  |
| 65.97 | 2.12  |
| 12.3  | 1.3   |
| 17.07 | 2.7   |
| 23.1  | 0.87  |
| 15.28 | 1.4   |
| 12.37 | 1.2   |
| 15.36 | 1.53  |
| 12    | 0.66  |
| 14.32 | 0.87  |
| 12    | 0.98  |
| 21    | 0.89  |
| 60.13 | 0.9   |



|       |      |
|-------|------|
| 12.4  | 1.54 |
| 17    | 5.6  |
| 15.84 | 0.77 |
| 32.8  | 0.76 |
| 17.46 | 0.94 |
| 9.01  | 4.6  |
| 14    | 5.4  |
| 21    | 3.5  |
| 23.6  | 0.97 |
| 20.64 | 1.76 |
| 8.46  | 1.75 |
| 8.7   | 1.53 |
| 14    | 0.43 |
| 40.23 | 1.53 |
| 21    | 1.53 |
| 26.36 | 1.22 |
| 22.16 | 2.01 |
| 11.81 | 1.54 |
| 13.94 | 0.61 |
| 21    | 1.3  |
| 21    | 1.3  |
| 10.63 | 0.76 |
| 23.1  | 7.8  |
| 9.35  | 0.99 |
| 17.29 | 1.76 |
| 12.1  | 1.54 |
| 52.67 | 0.87 |
| 13.93 | 0.58 |
| 10.93 | 0.54 |
| 101.6 | 0.43 |
| 11.36 | 1.89 |
| 14.14 | 0.1  |
| 250.2 | 0.97 |
| 27.19 | 0.54 |
| 32.1  | 1.23 |
| 62.85 | 5.12 |
| 15.15 | 0.87 |
| 21.1  | 0.87 |
| 21.32 | 1.56 |
| 23.27 | 1.32 |
| 17.12 | 1.32 |
| 18.33 | 0.87 |
| 3     | 0.61 |
| 6.55  | 0.33 |
| 13.43 | 0.87 |
| 21.32 | 0.65 |
| 107.6 | 0.97 |
| 17    | 0.87 |
| 39.45 | 3.5  |
| 21    | 0.43 |
| 13.45 | 0.23 |

|       |      |
|-------|------|
| 11.51 | 0.94 |
| 78    | 3.56 |
| 13.86 | 0.53 |
| 32.22 | 0.65 |
| 21    | 4.6  |
| 17.29 | 1.43 |
| 11.44 | 1.43 |
| 21    | 1.32 |
| 9.7   | 1.32 |
| 11.78 | 7.4  |
| 12.09 | 3.5  |
| 19.01 | 1.43 |
| 19    | 2.31 |
| 13.43 | 1.34 |
| 16.7  | 1.32 |
| 9     | 0.41 |
| 13.43 | 1.76 |
| 4.53  | 0.26 |
| 8.14  | 1.54 |
| 31.05 | 1.23 |
| 12.84 | 0.78 |
| 13.81 | 0.78 |
| 35.15 | 3.36 |
| 39.93 | 1.67 |
| 9.21  | 1.76 |
| 9.7   | 0.67 |
| 26.16 | 0.41 |
| 11.88 | 1.35 |
| 22.59 | 0.33 |
| 370   | 0.66 |
| 3.21  | 2.32 |
| 23.1  | 1.54 |
| 10.68 | 0.87 |
| 11.64 | 2.7  |
| 9.52  | 1.85 |
| 28.02 | 1.26 |
| 12    | 3.5  |
| 16.04 | 0.94 |
| 21.76 | 0.94 |
| 4.12  | 1.43 |
| 9.39  | 1.75 |
| 29.43 | 1.9  |
| 12    | 1.98 |
| 12.1  | 1.32 |
| 13.81 | 0.98 |
| 22.6  | 1.34 |
| 38.44 | 0.54 |
| 49.88 | 1.54 |
| 12    | 2.13 |
| 12.8  | 1.2  |
| 23.2  | 0.99 |

|       |      |
|-------|------|
| 1.32  | 0.56 |
| 23.1  | 0.99 |
| 16.47 | 0.79 |
| 184.7 | 0.51 |
| 23.2  | 1.32 |
| 13.43 | 1.34 |
| 13.4  | 2.91 |
| 32    | 0.87 |
| 12.4  | 76   |
| 41    | 2.54 |
| 12.99 | 1.76 |
| 77.01 | 1.16 |
| 24.8  | 0.31 |
| 24.62 | 1.43 |
| 24.82 | 0.51 |
| 21.49 | 0.78 |
| 63.9  | 2.32 |
| 1.6   | 0.87 |
| 2.41  | 0.87 |
| 12    | 0.26 |
| 43    | 0.99 |
| 52.55 | 0.46 |
| 12    | 76   |
| 14.71 | 2.7  |
| 9.6   | 0.15 |
| 21.79 | 3.56 |
| 12.68 | 0.76 |
| 23.15 | 0.65 |
| 32    | 0.87 |
| 32    | 0.23 |
| 18.85 | 0.75 |
| 12.4  | 5.6  |
| 11    | 1.75 |
| 7.95  | 1.43 |
| 18.34 | 2.56 |
| 13.64 | 0.87 |
| 41    | 0.43 |
| 18.92 | 0.87 |
| 43    | 0.87 |
| 18.6  | 0.66 |
| 18.6  | 0.61 |
| 10.68 | 0.43 |
| 12.3  | 1.3  |
| 32    | 1.76 |
| 8.3   | 1.76 |
| 11    | 0.54 |
| 14.95 | 2.32 |
| 49.88 | 0.54 |
| 12.8  | 1.32 |
| 12    | 1.43 |
| 78.95 | 1.32 |

|       |      |
|-------|------|
| 78    | 1.2  |
| 9.02  | 1.54 |
| 16.32 | 0.97 |
| 13.43 | 0.65 |
| 23.43 | 1.67 |
| 21.3  | 1.76 |
| 12.71 | 0.78 |
| 61.01 | 0.49 |
| 48.29 | 1.32 |
| 23.2  | 2.54 |
| 21    | 2.56 |
| 32    | 0.7  |
| 13.81 | 0.98 |
| 17.96 | 0.52 |
| 12    | 0.65 |
| 54    | 0.86 |
| 17.8  | 0.99 |
| 31.54 | 0.7  |
| 9.91  | 0.53 |
| 23    | 5.6  |
| 31    | 2.7  |
| 22.53 | 1.75 |
| 15.42 | 0.43 |
| 16.09 | 1.4  |
| 9.35  | 1.75 |
| 4.64  | 0.26 |
| 54    | 5.7  |
| 21    | 0.87 |
| 8.27  | 0.52 |
| 13.1  | 1.2  |
| 34.96 | 0.54 |
| 15.82 | 0.54 |
| 32    | 1.89 |
| 10.93 | 1.43 |
| 17    | 0.26 |
| 25.35 | 2.32 |
| 51.04 | 0.54 |
| 21.4  | 0.26 |
| 31.94 | 0.29 |
| 370   | 3.56 |
| 12.8  | 0.56 |
| 17.25 | 0.46 |
| 20.95 | 0.61 |
| 17.29 | 0.26 |
| 37.75 | 1.3  |
| 21.09 | 0.76 |
| 12.52 | 0.67 |
| 11.16 | 0.65 |
| 12.71 | 2.43 |
| 148   | 0.65 |
| 44.18 | 2.32 |

|       |      |
|-------|------|
| 10.89 | 1.43 |
| 38.61 | 1.43 |
| 14.54 | 1.75 |
| 1.32  | 3.2  |
| 49.87 | 0.66 |
| 76.3  | 1.54 |
| 7.6   | 3.5  |
| 30.42 | 0.3  |
| 13.43 | 0.46 |
| 15.65 | 2.7  |
| 11.36 | 3.56 |
| 2.41  | 4.3  |
| 4.2   | 1.54 |
| 13    | 0.67 |
| 14.84 | 0.87 |
| 32    | 0.99 |
| 7.95  | 0.56 |
| 15.82 | 0.87 |
| 9     | 76   |
| 13.81 | 0.54 |
| 9.01  | 1.43 |
| 48.29 | 1.17 |
| 11.78 | 2.32 |
| 16.47 | 1.98 |
| 15    | 0.43 |
| 11.32 | 1.43 |
| 32.13 | 0.67 |
| 35.3  | 0.79 |
| 12.54 | 0.65 |
| 33.21 | 1.89 |
| 11.7  | 1.45 |
| 14.41 | 1.3  |
| 24.55 | 1.98 |
| 16.87 | 1.54 |
| 41.77 | 0.87 |
| 21.67 | 0.75 |
| 3.067 | 2.6  |
| 16.12 | 1.16 |
| 21.64 | 1.54 |
| 15.2  | 2.42 |
| 4.48  | 0.87 |
| 15.44 | 0.43 |
| 11.9  | 0.21 |
| 15.39 | 0.43 |
| 12.4  | 1.32 |
| 20.3  | 1.4  |
| 8.98  | 1.53 |
| 11.2  | 1.22 |
| 9     | 0.9  |
| 12    | 1.43 |
| 18.4  | 0.55 |

|       |      |
|-------|------|
| 28.57 | 1.32 |
| 8.43  | 0.89 |
| 49.88 | 5.3  |
| 48.29 | 0.46 |
| 19.8  | 0.87 |
| 11.42 | 0.79 |
| 19.28 | 3.36 |
| 2.12  | 0.98 |
| 12.06 | 0.03 |
| 17.57 | 2.35 |
| 14.54 | 1.32 |
| 12.32 | 0.46 |
| 7.73  | 2.99 |
| 101.6 | 1.98 |
| 15.18 | 0.54 |
| 13.43 | 1.75 |
| 12    | 1.54 |
| 11.34 | 1.21 |
| 16.07 | 0.45 |
| 17.77 | 0.21 |
| 14.14 | 7.4  |
| 17.25 | 1.43 |
| 22.6  | 0.86 |
| 18.82 | 1.54 |
| 14.5  | 1.3  |
| 12    | 1.53 |
| 6.23  | 3.2  |
| 17.46 | 1.3  |
| 12    | 2.32 |
| 41    | 3.56 |
| 14.84 | 5.6  |
| 12    | 0.87 |
| 12.18 | 0.54 |
| 14    | 1.65 |
| 121.6 | 1.98 |
| 23.85 | 0.46 |
| 15.82 | 1.43 |
| 11.22 | 1.34 |
| 17.08 | 1.98 |
| 36.58 | 2.32 |
| 25.88 | 0.78 |
| 7.73  | 2.56 |
| 14.96 | 0.37 |
| 49.56 | 1.34 |
| 32.12 | 0.34 |
| 15.98 | 0.09 |
| 55.64 | 1.54 |
| 18.74 | 1.56 |
| 24.55 | 1.12 |
| 22.06 | 0.86 |
| 16.77 | 0.7  |

|       |      |
|-------|------|
| 17.25 | 0.54 |
| 32    | 1.3  |
| 17.29 | 2.56 |
| 12.89 | 1.43 |
| 17.29 | 1.68 |
| 12.43 | 2.54 |
| 13.16 | 0.49 |
| 32.1  | 0.67 |
| 17.3  | 0.87 |
| 21    | 7.4  |
| 7.73  | 7.4  |
| 12.8  | 2.1  |
| 32    | 3.21 |
| 14.12 | 1.4  |
| 51.64 | 0.45 |
| 11.52 | 0.54 |
| 21    | 1.3  |
| 13.4  | 1.54 |
| 11.78 | 0.87 |
| 14    | 0.98 |
| 32.22 | 1.2  |
| 23    | 2.99 |
| 8.24  | 0.54 |
| 18.6  | 2.32 |
| 8.24  | 1.54 |
| 37.78 | 0.94 |
| 14    | 3.5  |
| 49.87 | 5.3  |
| 25.35 | 0.45 |
| 370   | 0.98 |
| 14.41 | 0.87 |
| 16.77 | 0.98 |
| 21    | 1.06 |
| 13.31 | 0.72 |
| 9.01  | 0.99 |
| 12    | 1.43 |
| 4.53  | 1.2  |
| 11.2  | 1.53 |
| 11.42 | 2.01 |
| 19.65 | 0.33 |
| 29.07 | 0.87 |
| 23    | 7.4  |
| 25.35 | 1.02 |
| 10.12 | 0.88 |
| 13.51 | 0.86 |
| 29.59 | 1.75 |
| 13.81 | 0.98 |
| 35.8  | 0.87 |
| 13.31 | 0.26 |
| 47.49 | 1.23 |
| 100.8 | 2.99 |

|       |      |
|-------|------|
| 17.5  | 1.54 |
| 14.01 | 1.43 |
| 41    | 1.98 |
| 19.2  | 2.12 |
| 21    | 0.97 |
| 13.59 | 0.87 |
| 23.2  | 0.99 |
| 8.14  | 0.87 |
| 19.65 | 2.32 |
| 12    | 1.98 |
| 18.79 | 0.56 |
| 32.67 | 0.76 |
| 17.21 | 1.43 |
| 23.6  | 0.54 |
| 12.4  | 1.43 |
| 19.49 | 0.95 |
| 15.27 | 0.78 |
| 46.72 | 0.76 |
| 43.9  | 0.65 |
| 5.26  | 0.89 |
| 26.13 | 3.36 |
| 13.34 | 1.32 |
| 22.12 | 0.76 |
| 24.31 | 0.87 |
| 32    | 0.54 |
| 43.39 | 0.86 |
| 21.17 | 1.42 |
| 12.32 | 1.75 |
| 9.76  | 2.1  |
| 15.65 | 0.7  |
| 2.41  | 0.79 |
| 8.79  | 0.46 |
| 12.4  | 0.46 |
| 11.58 | 0.76 |
| 370   | 2    |
| 15.43 | 0.43 |
| 32    | 2.32 |
| 32    | 0.87 |
| 4.53  | 1.54 |
| 6.85  | 0.86 |
| 10.47 | 0.54 |
| 11.22 | 1.76 |
| 7.73  | 2.4  |
| 32    | 1.3  |
| 12    | 2.32 |
| 43    | 1.2  |
| 14    | 1.43 |
| 32    | 1.98 |
| 11.2  | 1.45 |
| 93.74 | 0.26 |
| 61.82 | 3.3  |



|       |      |
|-------|------|
| 12.07 | 0.45 |
| 23    | 0.56 |
| 12    | 1.54 |
| 12    | 0.46 |
| 14.7  | 2.34 |
| 38.88 | 0.4  |
| 32.1  | 0.35 |
| 3.51  | 1.21 |
| 20.52 | 1.32 |
| 23.85 | 1.53 |
| 21    | 0.86 |
| 23.97 | 0.46 |
| 43    | 0.65 |
| 10.62 | 2.32 |
| 39.16 | 1.54 |
| 18    | 5.3  |
| 10.68 | 1.43 |
| 14    | 1.43 |
| 14.41 | 1.87 |
| 16.51 | 0.09 |
| 22.06 | 0.56 |
| 23    | 1.75 |
| 23.13 | 1.67 |
| 14.55 | 0.4  |
| 22.75 | 0.29 |
| 23.13 | 0.93 |
| 17.34 | 1.43 |
| 14.82 | 0.87 |
| 12.09 | 1.23 |
| 3.85  | 0.66 |
| 20.46 | 1.36 |
| 55.72 | 1.77 |
| 20.58 | 1.32 |
| 13.37 | 1.54 |
| 43.77 | 0.98 |
| 8.14  | 0.87 |
| 23    | 1.32 |
| 19.65 | 2.01 |
| 15.18 | 1.98 |
| 20.46 | 1.43 |
| 32    | 2.13 |
| 26.49 | 0.89 |
| 32.1  | 1.83 |
| 23.63 | 1.4  |
| 18.89 | 0.69 |
| 45.23 | 0.98 |
| 21    | 2.32 |
| 9.01  | 0.26 |
| 14.41 | 0.85 |
| 22.6  | 2.7  |
| 22.6  | 1.59 |

|       |      |
|-------|------|
| 9     | 0.34 |
| 18.9  | 6.3  |
| 271.9 | 1.21 |
| 9.6   | 0.1  |
| 27.25 | 0.65 |
| 14.73 | 1.2  |
| 10.57 | 1.56 |
| 13    | 1.75 |
| 21    | 1.2  |
| 13    | 3.5  |
| 18.6  | 5.3  |
| 41.77 | 1.54 |
| 23    | 1.43 |
| 11.33 | 1.43 |
| 21    | 1.21 |
| 28.57 | 2.32 |
| 34.72 | 1.65 |
| 1.32  | 0.87 |
| 9.32  | 1.76 |
| 23.6  | 1.23 |
| 23.1  | 1.5  |
| 16.22 | 0.87 |
| 17.05 | 0.67 |
| 17.29 | 1.22 |
| 10.93 | 1.98 |
| 12    | 0.46 |
| 22.06 | 0.87 |
| 8.79  | 2.1  |
| 43.2  | 1.2  |
| 32    | 0.61 |
| 13.1  | 0.98 |
| 26.58 | 0.65 |
| 16.47 | 2    |
| 30.04 | 2.26 |
| 23    | 0.48 |
| 13.4  | 1.58 |
| 11.22 | 7.8  |
| 8.37  | 1.53 |
| 15.5  | 0.54 |
| 21    | 0.26 |
| 12.62 | 0.43 |
| 12.4  | 1.23 |
| 14.7  | 7.4  |
| 12.4  | 0.98 |
| 2.41  | 0.54 |
| 9     | 1.43 |
| 12    | 0.34 |
| 23.85 | 1.87 |
| 18.53 | 1.34 |
| 31.15 | 2.14 |
| 21.4  | 1.2  |

|       |      |
|-------|------|
| 31.18 | 1.2  |
| 14    | 0.87 |
| 21.34 | 1.3  |
| 48.29 | 1.49 |
| 13.39 | 0.76 |
| 14.87 | 1.9  |
| 12.33 | 2.34 |
| 21    | 0.75 |
| 23    | 1.32 |
| 11    | 2.7  |
| 12    | 2.1  |
| 6     | 0.85 |
| 12    | 0.99 |
| 12.18 | 0.61 |
| 13.81 | 2.31 |
| 21.83 | 0.14 |
| 19.01 | 1.54 |
| 12.93 | 1.32 |
| 42.47 | 1.23 |
| 11.42 | 2.99 |
| 22.06 | 1.54 |
| 70.56 | 0.87 |
| 13.4  | 1.43 |
| 27.19 | 0.95 |
| 20.95 | 2.1  |
| 16.77 | 1.75 |
| 10.71 | 0.16 |
| 15.02 | 0.18 |
| 15.82 | 1.54 |
| 17.48 | 0.23 |
| 269.9 | 5.5  |
| 20.95 | 1.54 |
| 16.27 | 3.2  |
| 16    | 0.61 |
| 19.02 | 0.87 |
| 12    | 1.67 |
| 15    | 0.99 |
| 13.78 | 2.68 |
| 21.17 | 0.87 |
| 12.4  | 0.87 |
| 11    | 0.54 |
| 32.22 | 2.32 |
| 43.89 | 0.79 |
| 14.42 | 0.79 |
| 23    | 2.42 |
| 19.01 | 4.6  |
| 25.57 | 0.79 |
| 27.7  | 0.98 |
| 16.35 | 1.65 |
| 8.23  | 6.3  |
| 21    | 0.45 |

|       |      |
|-------|------|
| 10.7  | 1.43 |
| 6.36  | 0.66 |
| 12    | 0.98 |
| 23    | 0.87 |
| 29.59 | 5.3  |
| 2.17  | 0.98 |
| 22.84 | 2.97 |
| 87.39 | 2.32 |
| 21.73 | 0.32 |
| 13.49 | 1.76 |
| 9.76  | 0.46 |
| 32    | 1.43 |
| 6.36  | 7.4  |
| 12.1  | 0.66 |
| 12.3  | 1.98 |
| 47.14 | 1.32 |
| 23.4  | 0.54 |
| 10.15 | 1.45 |
| 25.32 | 76   |
| 43    | 0.54 |
| 15.61 | 0.09 |
| 13.83 | 5.43 |
| 19.57 | 0.34 |
| 14.84 | 0.76 |
| 23.64 | 3.3  |
| 15.07 | 2.1  |
| 12    | 1.54 |
| 8.79  | 0.87 |
| 6.36  | 0.39 |
| 16.3  | 1.98 |
| 21    | 0.43 |
| 21.17 | 1.54 |
| 43    | 0.26 |
| 10.69 | 0.98 |
| 6.77  | 0.45 |
| 19.96 | 0.98 |
| 28.22 | 2.1  |
| 4     | 1.54 |
| 25.63 | 0.7  |
| 21    | 1.54 |
| 12.4  | 0.46 |
| 21    | 1.23 |
| 12.3  | 1.32 |
| 12.3  | 1.4  |
| 23    | 0.98 |
| 4.53  | 0.54 |
| 9.01  | 5.3  |
| 14.95 | 1.43 |
| 9     | 0.43 |
| 222.3 | 0.67 |
| 14    | 0.26 |

|       |       |
|-------|-------|
| 12    | 4.35  |
| 18.33 | 5.3   |
| 15.65 | 0.46  |
| 22.83 | 0.65  |
| 22.08 | 0.05  |
| 370   | 1.4   |
| 9.3   | 0.09  |
| 19.23 | 1.65  |
| 14.79 | 2.11  |
| 15.28 | 13.34 |
| 2.53  | 0.46  |
| 9.16  | 1.43  |
| 34.81 | 1.76  |
| 14.41 | 0.9   |
| 23.1  | 2.53  |
| 107.6 | 0.86  |
| 9     | 0.46  |
| 11.44 | 2.56  |
| 12.4  | 0.66  |
| 13.93 | 1.65  |
| 6.36  | 1.967 |
| 9.35  | 0.39  |
| 10.69 | 5.5   |
| 51.64 | 1.43  |
| 40.87 | 1.43  |
| 6.36  | 1.75  |
| 15    | 1.54  |
| 34.81 | 2.24  |
| 43    | 1.4   |
| 9     | 2.1   |
| 32    | 0.99  |
| 12.8  | 0.87  |
| 39.33 | 7.4   |
| 23.1  | 0.54  |
| 121.6 | 1.98  |
| 16.77 | 1.65  |
| 25.23 | 1.32  |
| 20.27 | 0.4   |
| 52.55 | 0.61  |
| 17.25 | 2.43  |
| 11    | 0.46  |
| 5.6   | 1.54  |
| 8.4   | 1.12  |
| 23.06 | 5.3   |
| 13.32 | 1.43  |
| 14    | 1.4   |
| 60.13 | 1.43  |
| 8.24  | 0.54  |
| 16.87 | 6.3   |
| 21    | 0.87  |
| 21.43 | 1.56  |

|       |      |
|-------|------|
| 23.85 | 1.2  |
| 14.54 | 1.2  |
| 370   | 0.61 |
| 49.88 | 2.54 |
| 12    | 1.98 |
| 25.63 | 1.3  |
| 12.82 | 0.67 |
| 5.6   | 1.76 |
| 12.37 | 0.41 |
| 18.33 | 1.43 |
| 18.34 | 1.54 |
| 22.53 | 0.61 |
| 32.1  | 1.06 |
| 23    | 2.7  |
| 9.21  | 0.76 |
| 2.52  | 0.67 |
| 10.68 | 1.98 |
| 11.2  | 1.54 |
| 20.95 | 2.01 |
| 20.38 | 0.93 |
| 16.26 | 1.32 |
| 14.41 | 2.4  |
| 14.87 | 1.54 |
| 5     | 1.54 |
| 18.8  | 1.53 |
| 12.3  | 1.86 |
| 54.32 | 2.01 |
| 12    | 1.36 |
| 21    | 1.43 |
| 14.14 | 2.1  |
| 39.16 | 1.68 |
| 13    | 1.98 |
| 14.91 | 1.98 |
| 8.9   | 1.65 |
| 15.32 | 2.99 |
| 15.65 | 0.34 |
| 60.13 | 1.43 |
| 43    | 0.97 |
| 14.74 | 0.87 |
| 10.47 | 0.98 |
| 21    | 1.54 |
| 17.25 | 0.26 |
| 21.32 | 1.89 |
| 34    | 4.6  |
| 32    | 7.8  |
| 14    | 1.65 |
| 35.89 | 0.58 |
| 14    | 1.2  |
| 23.59 | 1.3  |
| 31.56 | 0.26 |
| 67    | 2.32 |

|       |      |
|-------|------|
| 184.7 | 1.54 |
| 9.01  | 1.43 |
| 15.65 | 1.45 |
| 17.29 | 0.7  |
| 38.44 | 1.43 |
| 8.34  | 1.43 |
| 1.32  | 1.43 |
| 17.07 | 0.26 |
| 18.16 | 3.21 |
| 16.76 | 0.87 |
| 215.4 | 1.54 |
| 21    | 2.12 |
| 14.96 | 0.54 |
| 21    | 0.26 |
| 20.95 | 0.98 |
| 13.4  | 0.54 |
| 6.55  | 1.87 |
| 21.71 | 2.32 |
| 16.04 | 0.53 |
| 15.43 | 1.43 |
| 12.3  | 2.65 |
| 12.3  | 1.87 |
| 6.15  | 2.43 |
| 17.96 | 0.87 |
| 23.6  | 5.3  |
| 8.14  | 0.46 |
| 21.3  | 1.54 |
| 87.39 | 0.46 |
| 19.91 | 2.54 |
| 43    | 1.98 |
| 21    | 0.87 |
| 13.2  | 0.76 |
| 9     | 1.75 |
| 20.94 | 2.32 |
| 11.67 | 5.3  |
| 14    | 0.98 |
| 11.5  | 0.78 |
| 149.2 | 1.36 |
| 9.98  | 0.12 |
| 4.53  | 1.54 |
| 32.12 | 0.26 |
| 102.2 | 0.87 |
| 17.82 | 8.55 |
| 102.2 | 1.23 |
| 13    | 0.97 |
| 134.9 | 0.43 |
| 27.1  | 0.98 |
| 5.5   | 0.23 |
| 13    | 1.2  |
| 22.6  | 0.66 |
| 11.87 | 0.87 |

|       |      |
|-------|------|
| 23    | 0.34 |
| 21    | 1.06 |
| 25.63 | 2.32 |
| 107.6 | 1.98 |
| 27.94 | 1.43 |
| 17.05 | 0.98 |
| 18.4  | 0.34 |
| 128.3 | 2.32 |
| 10.88 | 0.76 |
| 38.56 | 0.98 |
| 14.46 | 1.22 |
| 11.44 | 1.54 |
| 25.35 | 0.87 |
| 41    | 1.43 |
| 12.4  | 1.23 |
| 23.4  | 0.23 |
| 32.38 | 3.21 |
| 24    | 4.34 |
| 3.21  | 0.97 |
| 7.5   | 1.32 |
| 15.52 | 0.87 |
| 19    | 2.12 |
| 14.87 | 5.3  |
| 11.44 | 0.61 |
| 15.5  | 1.23 |
| 13.83 | 1.53 |
| 27.15 | 1.3  |
| 32.12 | 0.79 |
| 13.4  | 1.54 |
| 10.69 | 1.3  |
| 13.26 | 0.7  |
| 13.43 | 0.75 |
| 12.4  | 0.96 |
| 38.44 | 5.5  |
| 17.37 | 6.3  |
| 12    | 0.98 |
| 32    | 2.32 |
| 23.72 | 0.98 |
| 9     | 2.54 |
| 22.65 | 2.7  |
| 13    | 1.3  |
| 11.78 | 1.98 |
| 12.4  | 0.34 |
| 15.36 | 1.32 |
| 32    | 0.54 |
| 18.33 | 5.5  |
| 13    | 1.22 |
| 12    | 1.54 |
| 12    | 0.87 |
| 22.6  | 0.66 |
| 10.7  | 0.46 |



|        |       |
|--------|-------|
| 13. 2  | 1. 98 |
| 11. 64 | 1. 34 |
| 22. 53 | 1. 93 |
| 13. 83 | 1. 67 |
| 20. 2  | 1. 54 |
| 12. 32 | 1. 23 |
| 8. 21  | 1. 14 |
| 16. 74 | 0. 5  |
| 23. 15 | 0. 97 |
| 15. 93 | 0. 66 |
| 32     | 0. 43 |
| 43     | 1. 34 |
| 3. 21  | 1. 43 |
| 21. 3  | 1. 87 |
| 23. 61 | 1. 34 |
| 9. 8   | 1. 23 |
| 23. 4  | 0. 98 |
| 32     | 0. 61 |
| 11. 16 | 0. 76 |
| 19. 32 | 0. 87 |
| 12. 1  | 0. 87 |
| 11. 83 | 1. 32 |
| 15. 24 | 2. 12 |
| 12. 15 | 2. 43 |
| 21. 21 | 2. 13 |
| 12. 32 | 3. 56 |
| 21     | 0. 3  |
| 18. 71 | 1. 54 |
| 19. 5  | 0. 23 |
| 16     | 1. 2  |
| 11. 67 | 1. 06 |
| 21. 3  | 1. 47 |
| 38. 61 | 1. 65 |
| 43. 12 | 1. 43 |
| 23. 2  | 5. 6  |
| 29. 59 | 1. 68 |
| 101. 6 | 0. 87 |
| 12. 27 | 2. 32 |
| 21. 17 | 0. 76 |
| 19     | 76    |
| 39. 96 | 0. 54 |
| 67     | 1. 75 |
| 21. 17 | 0. 98 |
| 14. 41 | 0. 54 |
| 43. 77 | 0. 54 |
| 102. 2 | 2. 31 |
| 19. 29 | 1. 43 |
| 29. 12 | 1. 29 |
| 35. 61 | 1. 23 |
| 60. 13 | 0. 56 |
| 43     | 0. 98 |

|       |       |
|-------|-------|
| 11.44 | 1.43  |
| 23.77 | 1.67  |
| 14.73 | 1.67  |
| 15.4  | 1.16  |
| 28.7  | 1.16  |
| 15.18 | 0.66  |
| 3.6   | 1.76  |
| 10.69 | 1.5   |
| 10.2  | 1.3   |
| 9     | 0.57  |
| 11    | 1.3   |
| 14.33 | 0.98  |
| 18.34 | 0.46  |
| 11.36 | 0.786 |
| 23.63 | 1.42  |
| 13.62 | 1.53  |
| 17.25 | 0.54  |
| 10.67 | 1.32  |
| 12    | 2.32  |
| 12.53 | 1.54  |
| 100.5 | 0.97  |
| 12    | 0.76  |
| 11.67 | 1.17  |
| 23.4  | 1.75  |
| 14.24 | 0.68  |
| 22.76 | 1.3   |
| 11.64 | 0.99  |
| 4.53  | 0.66  |
| 10.63 | 1.54  |
| 23.41 | 1.4   |
| 13.19 | 1.2   |
| 13    | 0.97  |
| 48.29 | 1.65  |
| 13.39 | 1.3   |
| 10.93 | 0.87  |
| 18.24 | 0.99  |
| 1.32  | 1.43  |
| 34.81 | 0.43  |
| 14    | 0.64  |
| 19.4  | 2.12  |
| 13.77 | 1.32  |
| 21    | 1.54  |
| 18.53 | 0.26  |
| 30.04 | 0.97  |
| 15.32 | 0.87  |
| 15.95 | 0.97  |
| 26.89 | 5.5   |
| 12.98 | 0.76  |
| 12.95 | 0.21  |
| 21    | 2.32  |
| 19.01 | 2.43  |

|       |      |
|-------|------|
| 101.6 | 1.3  |
| 43    | 1.54 |
| 14.95 | 0.87 |
| 208.5 | 0.87 |
| 12    | 1.3  |
| 41.73 | 1.4  |
| 7.95  | 0.46 |
| 3.21  | 0.9  |
| 19.29 | 0.34 |
| 1.21  | 0.54 |
| 10.69 | 0.54 |
| 13.92 | 7.4  |
| 43.21 | 1.3  |
| 15.88 | 0.34 |
| 17.87 | 1.09 |
| 13.39 | 0.43 |
| 8.5   | 1.54 |
| 13.55 | 0.78 |
| 15    | 0.43 |
| 18.94 | 2.97 |
| 34.21 | 1.34 |
| 21.45 | 5.6  |
| 22.96 | 2.12 |
| 40.63 | 2.31 |
| 13    | 0.97 |
| 22.53 | 0.87 |
| 21.3  | 0.61 |
| 43.2  | 0.54 |
| 61.86 | 0.76 |
| 64.39 | 0.9  |
| 21.21 | 0.87 |
| 16.47 | 3.56 |
| 22.06 | 0.65 |
| 125.1 | 1.54 |
| 121.5 | 0.87 |
| 15.5  | 1.3  |
| 22.6  | 1.45 |
| 29.27 | 1.56 |
| 52.55 | 0.26 |
| 32    | 0.67 |
| 14    | 0.87 |
| 5.32  | 0.64 |
| 20.95 | 2.7  |
| 14.95 | 1.43 |
| 101.6 | 0.87 |
| 8.79  | 1.68 |
| 13.43 | 0.65 |
| 14.87 | 0.87 |
| 13.2  | 0.26 |
| 18.93 | 1.43 |
| 12.43 | 0.48 |

|       |      |
|-------|------|
| 12    | 1.76 |
| 10.68 | 5.6  |
| 32    | 2.87 |
| 10.7  | 1.2  |
| 13    | 0.56 |
| 25.63 | 0.39 |
| 11.67 | 0.72 |
| 17.25 | 0.9  |
| 22    | 1.34 |
| 17.21 | 1.74 |
| 11.36 | 0.26 |
| 94.47 | 1.43 |
| 22.77 | 0.98 |
| 16.88 | 1.76 |
| 14    | 1.54 |
| 24.32 | 3.56 |
| 13.26 | 1.23 |
| 21    | 2.32 |
| 4.53  | 1.98 |
| 17.08 | 0.34 |
| 17.69 | 2.54 |
| 16.76 | 1.54 |
| 5     | 0.97 |
| 15.81 | 0.59 |
| 22.33 | 1.54 |
| 12    | 1.54 |
| 25.63 | 0.99 |
| 43.77 | 2.99 |
| 12    | 0.34 |
| 20.95 | 1.65 |
| 17.83 | 1.9  |
| 22.44 | 2.43 |
| 7.63  | 1.87 |
| 21.17 | 1.43 |
| 102.2 | 1.3  |
| 8.14  | 3.2  |
| 8.97  | 2.54 |
| 20.41 | 3.4  |
| 17.91 | 1.54 |
| 11.67 | 0.87 |
| 10.7  | 4.6  |
| 12.3  | 0.93 |
| 12    | 1.54 |
| 21    | 1.76 |
| 25.28 | 2.32 |
| 24.56 | 2.78 |
| 15.52 | 0.87 |
| 87.39 | 1.54 |
| 23.6  | 0.76 |
| 28.11 | 1.14 |
| 199.2 | 0.43 |

|       |      |
|-------|------|
| 12.4  | 1.3  |
| 21.83 | 5.6  |
| 32    | 1.2  |
| 43.77 | 0.46 |
| 12    | 1.23 |
| 13.06 | 1.3  |
| 22.5  | 1.32 |
| 87.39 | 0.86 |
| 14    | 0.56 |
| 32    | 2.99 |
| 16.56 | 1.3  |
| 32.12 | 0.76 |
| 4.41  | 0.87 |
| 15.5  | 5.3  |
| 54.74 | 0.54 |
| 52.55 | 1.4  |
| 19.57 | 0.94 |
| 32    | 0.72 |
| 12    | 1.54 |
| 12.72 | 1.43 |
| 11.22 | 0.98 |
| 13.59 | 1.76 |
| 39.43 | 1.3  |
| 12    | 0.43 |
| 15.5  | 0.86 |
| 12.32 | 0.97 |
| 23.32 | 1    |
| 15.52 | 0.99 |
| 23    | 1.43 |
| 48.29 | 0.61 |
| 17    | 0.54 |
| 39.79 | 0.41 |
| 16.47 | 1.06 |
| 9     | 1.42 |
| 28.71 | 0.66 |
| 27.19 | 9.19 |
| 13.39 | 1.87 |
| 12    | 1.76 |
| 15    | 0.66 |
| 23.13 | 1.35 |
| 15    | 5.43 |
| 15.6  | 0.86 |
| 27.94 | 1.32 |
| 8.23  | 2.7  |
| 2.94  | 1.16 |
| 21    | 3.2  |
